# Supplementary material for: Endosymbiont Dominated Bacterial Communities in a Dwarf Spider
Source: PubMed Central journal article supplement (PMC4338242; doi:10.1371/journal.pone.0117297), 2015-02-23
Supplement: pone.0117297.s002.pdf [file pone.0117297.s002.pdf]

| OTU    | Number of reads |      | Greengenes taxonomic classification                                                                                                                                                                              |
|--------|-----------------|------|------------------------------------------------------------------------------------------------------------------------------------------------------------------------------------------------------------------|
|        | Wol-            | Wol+ |                                                                                                                                                                                                                  |
| Otu111 | 7               | 0    | Bacteria(100);Proteobacteria(100);Alphaproteobacteria(100);PB21(100);unclassified(100);unclassified(100);unclassified(100);unclassified(100);unclassified(100);unclassified(100);                                |
| Otu112 | 1               | 2    | Bacteria(100);Cyanobacteria(100);Chloroplasts(100);Dinophysis(100);unclassified(100);unclassified(100);unclassified(100);unclassified(100);unclassified(100);unclassified(100);                                  |
| Otu113 | 2               | 0    | Bacteria(100);Bacteroidetes(100);Bacteroidales(100);vadinBC27(100);unclassified(100);unclassified(100);unclassified(100);unclassified(100);unclassified(100);unclassified(100);                                  |
| Otu114 | 1               | 1    | Bacteria(100);Firmicutes(100);Clostridia(100);Clostridiales(100);Ruminococcus(100);p-1082-a5(100);Unclassified(100);unclassified(100);unclassified(100);unclassified(100);                                       |
| Otu115 | 8               | 0    | Bacteria(100);Proteobacteria(100);Gammaproteobacteria(100);Enterobacteriales_Enterobacteriaceae(100);Yersinia(100);unclassified(100);unclassified(100);unclassified(100);unclassified(100);unclassified(100);    |
| Otu116 | 5               | 0    | Bacteria(100);Firmicutes(100);Clostridia(100);Clostridiales(100);Johnsonella(100);Eubacterium_cf_saburreum_oral_strain_C27KA(100);Unclassified(100);unclassified(100);unclassified(100);unclassified(100);       |
| Otu117 | 2               | 1    | Bacteria(100);TM7(100);TM7-1(100);K20-27(100);unclassified(100);unclassified(100);unclassified(100);unclassified(100);unclassified(100);unclassified(100);unclassified(100);                                     |
| Otu118 | 1               | 0    | Bacteria(100);Bacteroidetes(100);Bacteroidales(100);Porphyromonadaceae(100);Porphyromonas_canis(100);Unclassified(100);unclassified(100);unclassified(100);unclassified(100);unclassified(100);                  |
| Otu119 | 1               | 0    | Bacteria(100);ABY1_OD1(100);FW129(100);Unclassified(100);unclassified(100);unclassified(100);unclassified(100);unclassified(100);unclassified(100);unclassified(100);                                            |
| Otu120 | 1               | 1    | Bacteria(100);Firmicutes(100);Clostridia(100);Peptostreptococaceae(100);Frigovirgula_patagoniensis(100);Clostridium_sticklandii(100);unclassified(100);unclassified(100);unclassified(100);unclassified(100);    |
| Otu121 | 4               | 1    | Bacteria(100);Actinobacteria(100);Actinobacteridae(100);Bifidobacteriaceae(100);Gardnerella(100);unclassified(100);unclassified(100);unclassified(100);unclassified(100);unclassified(100);unclassified(100);    |
| Otu122 | 2               | 2    | Bacteria(100);ZB3(100);Unclassified(100);unclassified(100);unclassified(100);unclassified(100);unclassified(100);unclassified(100);unclassified(100);unclassified(100);                                          |
| Otu123 | 1               | 0    | Bacteria(100);Proteobacteria(100);Gammaproteobacteria(100);Methylococaceae(100);Hyd24-01(100);unclassified(100);unclassified(100);unclassified(100);unclassified(100);unclassified(100);                         |
| Otu124 | 1               | 0    | Bacteria(100);Lentisphaerae(100);Victivallales(100);Victivallaceae(100);Unclassified(100);unclassified(100);unclassified(100);unclassified(100);unclassified(100);unclassified(100);unclassified(100);           |
| Otu125 | 1               | 0    | Bacteria(100);Proteobacteria(100);Gammaproteobacteria(100);Ferrimonadaceae(100);Unclassified(100);unclassified(100);unclassified(100);unclassified(100);unclassified(100);unclassified(100);                     |
| Otu126 | 1               | 1    | Bacteria(100);Firmicutes(100);Mollicutes(100);Spiroplasma_citri(100);Unclassified(100);unclassified(100);unclassified(100);unclassified(100);unclassified(100);unclassified(100);                                |
| Otu127 | 1               | 1    | Bacteria(100);Firmicutes(100);Clostridia(100);Peptostreptococaceae(100);Peptoniphilus(100);Peptoniphilus_indolicus(100);unclassified(100);unclassified(100);unclassified(100);unclassified(100);                 |
| Otu128 | 1               | 2    | Bacteria(100);Firmicutes(100);Desulfotomaculum(100);Desulfotomaculum_thermocisternum(100);Unclassified(100);unclassified(100);unclassified(100);unclassified(100);unclassified(100);unclassified(100);           |
| Otu129 | 1               | 0    | Bacteria(100);Verrucomicrobia(100);Spartobacteria(100);Chthoniobacter(100);unclassified(100);unclassified(100);unclassified(100);unclassified(100);unclassified(100);unclassified(100);                          |
| Otu130 | 1               | 2    | Bacteria(100);WS6(100);Unclassified(100);unclassified(100);unclassified(100);unclassified(100);unclassified(100);unclassified(100);unclassified(100);unclassified(100);                                          |
| Otu131 | 1               | 0    | Bacteria(100);Firmicutes(100);Clostridia(100);Peptostreptococaceae(100);Soehngenia(100);unclassified(100);unclassified(100);unclassified(100);unclassified(100);unclassified(100);unclassified(100);             |
| Otu132 | 81              | 0    | Bacteria(100);Firmicutes(100);Clostridia(100);Clostridiales(100);Coprococcus(100);Unclassified(100);unclassified(100);unclassified(100);unclassified(100);unclassified(100);                                     |
| Otu133 | 0               | 1    | Bacteria(100);Proteobacteria(100);Gammaproteobacteria(100);Alteromonadales(100);Pseudoalteromonadaceae(100);Unclassified(100);unclassified(100);unclassified(100);unclassified(100);unclassified(100);           |
| Otu134 | 0               | 1    | Bacteria(100);Proteobacteria(100);Gammaproteobacteria(100);Moraxellaceae(100);Moraxella_Psychrobacter(100);Psychrobacter(100);unclassified(100);unclassified(100);unclassified(100);unclassified(100);           |
| Otu135 | 5               | 2    | Bacteria(100);Proteobacteria(100);Gammaproteobacteria(100);Betaproteobacteria(100);Comamonadaceae(100);Comamonas(100);Unclassified(100);unclassified(100);unclassified(100);unclassified(100);                   |
| Otu136 | 8               | 0    | Bacteria(100);Firmicutes(100);Clostridia(100);Clostridiales(100);bacterium_MDA2477(100);unclassified(100);unclassified(100);unclassified(100);unclassified(100);unclassified(100);unclassified(100);             |
| Otu137 | 2               | 4    | Bacteria(100);SR1(100);BH1(100);unclassified(100);unclassified(100);unclassified(100);unclassified(100);unclassified(100);unclassified(100);unclassified(100);unclassified(100);                                 |
| Otu138 | 1               | 4    | Bacteria(100);Bacteroidetes(100);Sphingobacteriaceae(100);Sphingobacterium(100);Sphingobacterium_multivorum(100);unclassified(100);unclassified(100);unclassified(100);unclassified(100);unclassified(100);      |
| Otu139 | 5               | 0    | Bacteria(100);Bacteroidetes(100);Bacteroidales(100);Tannerellaceae(100);unclassified(100);unclassified(100);unclassified(100);unclassified(100);unclassified(100);unclassified(100);                             |
| Otu140 | 0               | 3    | Bacteria(100);Actinobacteria(100);Actinobacteridae(100);Brachyacterium(100);unclassified(100);unclassified(100);unclassified(100);unclassified(100);unclassified(100);unclassified(100);                         |
| Otu141 | 1               | 0    | Bacteria(100);Bacteroidetes(100);Bacteroidales(100);Bacteroidaceae(100);B_coprocota(100);unclassified(100);unclassified(100);unclassified(100);unclassified(100);unclassified(100);unclassified(100);            |
| Otu142 | 0               | 4    | Bacteria(100);Actinobacteria(100);Actinobacteridae(100);Rhodococcus_B(100);unclassified(100);unclassified(100);unclassified(100);unclassified(100);unclassified(100);unclassified(100);                          |
| Otu143 | 1               | 0    | Bacteria(100);Actinobacteria(100);Acidimicrobiae(100);EB1017_group(100);Acidimicrobiae_bacterium_Ellin7143(100);Unclassified(100);unclassified(100);unclassified(100);unclassified(100);unclassified(100);       |
| Otu144 | 3               | 0    | Bacteria(100);Proteobacteria(100);Gammaproteobacteria(100);Betaproteobacteria(100);Nitrosomonadales(100);Unclassified(100);unclassified(100);unclassified(100);unclassified(100);unclassified(100);              |
| Otu145 | 1               | 0    | Bacteria(100);Nitrospirae(100);Thermodesulfobiontales(100);Thermodesulfobiontales(100);Thermodesulfobiontales(100);Unclassified(100);unclassified(100);unclassified(100);unclassified(100);unclassified(100);    |
| Otu146 | 0               | 3    | Bacteria(100);Proteobacteria(100);Gammaproteobacteria(100);Betaproteobacteria(100);Alcaligenaceae(100);Unclassified(100);unclassified(100);unclassified(100);unclassified(100);unclassified(100);                |
| Otu147 | 2               | 0    | Bacteria(100);Bacteroidetes(100);Bacteroidales(100);p-184-o5(100);rc5-47(100);unclassified(100);unclassified(100);unclassified(100);unclassified(100);unclassified(100);unclassified(100);                       |
| Otu148 | 4               | 3    | Bacteria(100);Proteobacteria(100);Alphaproteobacteria(100);JP57(100);unclassified(100);unclassified(100);unclassified(100);unclassified(100);unclassified(100);unclassified(100);unclassified(100);              |
| Otu149 | 1               | 0    | Bacteria(100);Proteobacteria(100);Gammaproteobacteria(100);Nevskiaceae(100);Unclassified(100);unclassified(100);unclassified(100);unclassified(100);unclassified(100);unclassified(100);                         |
| Otu150 | 1               | 0    | Bacteria(100);Actinobacteria(100);Actinobacteridae(100);Propionibacterineae(100);Nocardioideae(100);unclassified(100);unclassified(100);unclassified(100);unclassified(100);unclassified(100);unclassified(100); |
| Otu151 | 3               | 0    | Bacteria(100);Proteobacteria(100);Pseudomonadaceae(100);glacial_ice_bacterium_M3C47K-2(100);Pseudomonas_psychrotolerans(100);unclassified(100);unclassified(100);unclassified(100);unclassified(100);            |
| Otu152 | 5               | 0    | Bacteria(100);Proteobacteria(100);Epsilonproteobacteria(100);Helicobacteriales(100);Helicobacteraceae(100);Wolinella(100);unclassified(100);unclassified(100);unclassified(100);unclassified(100);               |
| Otu153 | 1               | 0    | Bacteria(100);Firmicutes(100);Clostridia(100);Clostridiales(100);Clostridiaceae(100);pDH-A(100);unclassified(100);unclassified(100);unclassified(100);unclassified(100);unclassified(100);                       |
| Otu154 | 0               | 1    | Bacteria(100);Spirochaetes(100);Treponemaceae(100);Treponema(100);Rs-D01(100);unclassified(100);unclassified(100);unclassified(100);unclassified(100);unclassified(100);unclassified(100);                       |
| Otu155 | 4               | 0    | Bacteria(100);Lactobacillales(100);Lactobacillaceae(100);Lactobacillus(100);Lactobacillus_delbrueckii(100);Unclassified(100);unclassified(100);unclassified(100);unclassified(100);                              |
| Otu156 | 0               | 1    | Bacteria(100);Proteobacteria(100);Gammaproteobacteria(100);Betaproteobacteria(100);Sutterellaceae(100);HuCA4(100);unclassified(100);unclassified(100);unclassified(100);unclassified(100);                       |
| Otu157 | 1               | 0    | Bacteria(100);Proteobacteria(100);Alphaproteobacteria(100);Ellin314(100);Unclassified(100);unclassified(100);unclassified(100);unclassified(100);unclassified(100);unclassified(100);                            |
| Otu158 | 1               | 0    | Bacteria(100);Firmicutes(100);Clostridia(100);Clostridiales(100);C21_k11(100);unclassified(100);unclassified(100);unclassified(100);unclassified(100);unclassified(100);unclassified(100);                       |
| Otu159 | 0               | 1    | Bacteria(100);Proteobacteria(100);Gammaproteobacteria(100);Betaproteobacteria(100);Comamonadaceae(100);Unclassified(100);unclassified(100);unclassified(100);unclassified(100);unclassified(100);                |
| Otu160 | 6               | 3    | Bacteria(100);Proteobacteria(100);Alphaproteobacteria(100);Sphingomonadales(100);Sphingobium(100);Unclassified(100);unclassified(100);unclassified(100);unclassified(100);unclassified(100);unclassified(100);   |
| Otu161 | 0               | 2    | Bacteria(100);Acidobacteria(100);iii1-15(100);uncultivated_soil_bacterium_clone_C112(100);unclassified(100);unclassified(100);unclassified(100);unclassified(100);unclassified(100);unclassified(100);           |
| Otu162 | 1               | 1    | Bacteria(100);Actinobacteria(100);Actinobacteridae(100);Segniliparaceae(100);unclassified(100);unclassified(100);unclassified(100);unclassified(100);unclassified(100);unclassified(100);unclassified(100);      |
| Otu163 | 2               | 1    | Bacteria(100);Firmicutes(100);Bacilli(100);Lactobacillales(100);Aerococcaceae(100);Unclassified(100);unclassified(100);unclassified(100);unclassified(100);unclassified(100);unclassified(100);                  |
| Otu164 | 1               | 0    | Bacteria(100);Proteobacteria(100);Alphaproteobacteria(100);Crabtreeella(100);unclassified(100);unclassified(100);unclassified(100);unclassified(100);unclassified(100);unclassified(100);                        |
| Otu165 | 2               | 0    | Bacteria(100);Firmicutes(100);Clostridia(100);Peptostreptococaceae(100);Clostridium_felsineum(100);Clostridium_formicaceticum(100);unclassified(100);unclassified(100);unclassified(100);unclassified(100);      |
