# Supplementary material for: Endosymbiont Dominated Bacterial Communities in a Dwarf Spider
Source: PubMed Central journal article supplement (PMC4338242; doi:10.1371/journal.pone.0117297), 2015-02-23
Supplement: pone.0117297.s003.pdf [file pone.0117297.s003.pdf]

| OTU    | Number of reads |        | Taxonomy (NCBI nomenclature)                                | RDP classification                                                               | S_ab scor |
|--------|-----------------|--------|-------------------------------------------------------------|----------------------------------------------------------------------------------|-----------|
|        | Wol-            | Wol+   |                                                             |                                                                                  |           |
| Otu001 | 346830          | 392414 | Candidatus Rhabdochlamydia porcellionis; RKPshHep; AY223862 | Chlamydiae:Chlamydiales:unclassified_Chlamydiales                                | 0.735     |
| Otu002 | 29706           | 19864  | endosymbiont of Metaseiulus occidentalis; pAJ233; AY635291  | Sphingobacteria:Sphingobacteriales:unclassified_"Sphingobacteriales"             | 0.818     |
| Otu003 | 126             | 0      | uncultured Clostridiales bacterium; YNP_ObP_B94; DQ243771   | Clostridia:Clostridiales:Ruminococcaceae:Butyricoccus                            | 1         |
| Otu004 | 476             | 0      | uncultured bacterium; RL176_ah43e09; DQ793803               | Clostridia:Clostridiales:Ruminococcaceae:unclassified_Ruminococcaceae            | 0.937     |
| Otu005 | 2               | 0      | uncultured Ruminococcaceae bacterium; L-93; JX543456        | Clostridia:Clostridiales:Ruminococcaceae:Anaerofilum                             | 0.812     |
| Otu006 | 339             | 2      | uncultured bacterium; SHCB0510; JN697770                    | Clostridia:Clostridiales:Lachnospiraceae:Clostridium XIVa                        | 1         |
| Otu007 | 59847           | 10718  | Rickettsia limoniae; Gent; AF322442                         | Alphaproteobacteria:Rickettsiales:Rickettsiaceae:Rickettsia                      | 0.906     |
| Otu008 | 0               | 20437  | uncultured alpha proteobacterium; SHNY547; HM111424         | Alphaproteobacteria:Rickettsiales:Anaplasmataceae:Anaplasma                      | 0.619     |
| Otu009 | 1785            | 0      | uncultured bacterium; T6_3_15; EU828414                     | Bacteroidia:Bacteroidales:Bacteroidaceae:Bacteroides                             | 1         |
| Otu010 | 300             | 152    | Candidatus Rhabdochlamydia porcellionis; RKPshHep; AY223862 | Chlamydiae:Chlamydiales:unclassified_Chlamydiales                                | 0.797     |
| Otu011 | 94              | 0      | uncultured bacterium; IIIA-3; AJ488093                      | Clostridia:Clostridiales:Ruminococcaceae:Oscillibacter                           | 1         |
| Otu012 | 115             | 152    | Candidatus Rhabdochlamydia porcellionis; RKPshHep; AY223862 | Chlamydiae:Chlamydiales:unclassified_Chlamydiales                                | 0.649     |
| Otu013 | 0               | 1      | Candidatus Rhabdochlamydia porcellionis; RKPshHep; AY223862 | Chlamydiae:Chlamydiales:unclassified_Chlamydiales                                | 0.689     |
| Otu014 | 2               | 0      | uncultured bacterium; CFT211A12; DQ456247                   | Clostridia:Clostridiales:Ruminococcaceae:unclassified_Ruminococcaceae            | 1         |
| Otu015 | 89              | 0      | Desulfovibrio sp.; KRS1; X93146                             | Deltaproteobacteria:Desulfovibrionales:Desulfovibrionaceae:Desulfovibrio         | 1         |
| Otu016 | 2               | 2      | Candidatus Rhabdochlamydia porcellionis; RKPshHep; AY223862 | Chlamydiae:Chlamydiales:unclassified_Chlamydiales                                | 0.647     |
| Otu017 | 65              | 7      | Arcobacter butzleri (T); ATCC 49616; AY621116               | Epsilonproteobacteria:Campylobacteriales:Campylobacteraceae:Arcobacter           | 1         |
| Otu018 | 78              | 92     | Candidatus Rhabdochlamydia porcellionis; RKPshHep; AY223862 | Chlamydiae:Chlamydiales:unclassified_Chlamydiales                                | 0.715     |
| Otu019 | 97              | 4      | Stenotrophomonas maltophilia; VUN10075; AF137357            | Gammaproteobacteria:Xanthomonadales:Xanthomonadaceae:Stenotrophomonas            | 1         |
| Otu020 | 300             | 5      | Pseudomonas otitidis (T); MCC10330; AY953147                | Gammaproteobacteria:Pseudomonadales:Pseudomonadaceae:Pseudomonas                 | 0.967     |
| Otu021 | 96              | 1      | uncultured bacterium; OTU6; AB294747                        | Clostridia:Clostridiales:Ruminococcaceae:unclassified_Ruminococcaceae            | 1         |
| Otu022 | 34              | 26     | Candidatus Rhabdochlamydia porcellionis; RKPshHep; AY223862 | Chlamydiae:Chlamydiales:unclassified_Chlamydiales                                | 0.621     |
| Otu023 | 58              | 254    | uncultured bacterium; aab40c11; DQ818969                    | Gammaproteobacteria:Enterobacteriales:Enterobacteriaceae:Escherichia/Shigella    | 0.914     |
| Otu024 | 164             | 1      | Flavobacteriaceae genomosp. C1; C4MKM119; AY278614          | Flavobacteria:Flavobacteriales:Flavobacteriaceae:Cloacibacterium                 | 1         |
| Otu025 | 5               | 3      | Rickettsia endosymbiont of Torix tagoi; AB066351            | Alphaproteobacteria:Rickettsiales:Rickettsiaceae:Rickettsia                      | 0.634     |
| Otu026 | 153             | 0      | uncultured bacterium; KSB28; JX047081                       | Clostridia:Clostridiales:Clostridiales_Incertae Sedis XIII:Anaerovorax           | 1         |
| Otu027 | 8               | 39     | Cardinium endosymbiont of Marietta sp.; AY327470            | Sphingobacteria:Sphingobacteriales:unclassified_"Sphingobacteriales"             | 0.68      |
| Otu028 | 4               | 21     | Paracoccus marcusii (T); Y12703                             | Alphaproteobacteria:Rhodobacterales:Rhodobacteraceae:Paracoccus                  | 1         |
| Otu029 | 1               | 1      | uncultured bacterium; SRRB08; AB240501                      | Deltaproteobacteria:Bdellovibrionales:Bdellovibrionaceae:Vampirovibrio           | 0.732     |
| Otu030 | 55              | 81     | Candidatus Rhabdochlamydia porcellionis; RKPshHep; AY223862 | Chlamydiae:Chlamydiales:unclassified_Chlamydiales                                | 0.739     |
| Otu031 | 30              | 0      | uncultured bacterium; nbw788h02c1; GQ010923                 | Clostridia:Clostridiales:Ruminococcaceae:Clostridium IV                          | 1         |
| Otu032 | 29              | 0      | Xanthomonas theicola (T); LMG 8684 T; Y10763                | Gammaproteobacteria:Xanthomonadales:Xanthomonadaceae:Xanthomonas                 | 1         |
| Otu033 | 10              | 6      | Candidatus Rhabdochlamydia porcellionis; RKPshHep; AY223862 | Chlamydiae:Chlamydiales:unclassified_Chlamydiales                                | 0.682     |
| Otu034 | 3               | 6      | Candidatus Rhabdochlamydia porcellionis; RKPshHep; AY223862 | Chlamydiae:Chlamydiales:unclassified_Chlamydiales                                | 0.614     |
| Otu035 | 12              | 0      | Kocuria rhizophila; JPL-9; AY030315                         | Actinobacteria:Actinobacteriales:Actinomycetales:Micrococcineae                  | 1         |
| Otu036 | 245             | 0      | uncultured bacterium; nbw37d10c1; GQ059570                  | Bacteroidia:Bacteroidales:Porphyromonadaceae:unclassified_"Porphyromonadaceae"   | 1         |
| Otu037 | 0               | 1      | Candidatus Rhabdochlamydia porcellionis; RKPshHep; AY223862 | Chlamydiae:Chlamydiales:unclassified_Chlamydiales                                | 0.582     |
| Otu038 | 0               | 3      | uncultured Acidobacteria bacterium; AKYG1698; AY921973      | Acidobacteria_Gp4:Gp4:                                                           | 0.969     |
| Otu039 | 7               | 0      | uncultured bacterium; p-195-o5; AF371561                    | Clostridia:Clostridiales:Lachnospiraceae:Lachnospiraceae_incertae_sedis          | 1         |
| Otu040 | 1               | 0      | uncultured Xanthomonadaceae bacterium; AMEG10; AM935344     | Gammaproteobacteria:Xanthomonadales:Sinobacteraceae:unclassified_Sinobacteraceae | 0.852     |
| Otu041 | 0               | 8      | bacterium str. 96446; AF227855                              | Alphaproteobacteria:Rhodospirillales:Acetobacteraceae:Roseomonas                 | 1         |

| OTU    | Number of reads |      | Taxonomy (NCBI nomenclature)                               | RDP classification                                                                               | S_ab score |
|--------|-----------------|------|------------------------------------------------------------|--------------------------------------------------------------------------------------------------|------------|
|        | Wol-            | Wol+ |                                                            |                                                                                                  |            |
| Otu042 | 1               | 0    | Candidatus Rhabdochlamydia porcellionis; RKPsHep; AY223862 | Chlamydiae:Chlamydiales:unclassified_Chlamydiales                                                | 0.497      |
| Otu043 | 7               | 3    | uncultured bacterium; ncd761h06c1; HM295809                | Actinobacteria:Actinobacteridae:Actinomycetales:Corynebacterineae                                | 1          |
| Otu044 | 151             | 133  | Rhabdochlamydia crassificans; CRIB01; AY928092             | Chlamydiae:Chlamydiales:Parachlamydiaceae:Parachlamydia                                          | 0.58       |
| Otu045 | 42              | 0    | uncultured bacterium; G267; AY916285                       | Clostridia:Clostridiales:Ruminococcaceae:unclassified_Ruminococcaceae                            | 1          |
| Otu046 | 11              | 0    | uncultured bacterium; T6_3_15; EU828414                    | Bacteroidia:Bacteroidales:Bacteroidaceae:Bacteroides                                             | 0.748      |
| Otu047 | 0               | 7    | uncultured bacterium; ncd859g08c1; HM297941                | Actinobacteria:Actinobacteridae:Actinomycetales:Corynebacterineae:family                         | 1          |
| Otu048 | 10              | 0    | Clostridium sp. r53; AB470961                              | Clostridia:Clostridiales:Clostridiaceae 1:Clostridium sensu stricto                              | 0.891      |
| Otu049 | 0               | 1    | Candidatus Rhabdochlamydia porcellionis; RKPsHep; AY223862 | Chlamydiae:Chlamydiales:unclassified_Chlamydiales                                                | 0.612      |
| Otu050 | 4               | 16   | Micrococcus luteus; D7; AJ409095                           | Actinobacteria:Actinobacteridae:Actinomycetales:Micrococcineae:family                            | 1          |
| Otu051 | 62              | 40   | Moraxella osloensis; Ben 58; X95304                        | Gammaproteobacteria:Pseudomonadales:Moraxellaceae:Enhydrobacter                                  | 1          |
| Otu052 | 42              | 1    | uncultured bacterium; CR_52; JX457312                      | Erysipelotrichia:Erysipelotrichales:Erysipelotrichaceae:unclassified_Erysipelotrichaceae         | 1          |
| Otu053 | 74              | 0    | uncultured bacterium; IA-22; AJ488073                      | Epsilonproteobacteria:Campylobacterales:Campylobacteraceae:Sulfurospirillum                      | 1          |
| Otu054 | 8               | 0    | uncultured bacterium; WYSK 0002; AY179349                  | Clostridia:Clostridiales:Lachnospiraceae:Clostridium XIVa                                        | 0.868      |
| Otu055 | 7               | 0    | Clostridium ramosum; M91; AY699288                         | Erysipelotrichia:Erysipelotrichales:Erysipelotrichaceae:Clostridium XVIII:                       | 1          |
| Otu056 | 33              | 43   | Candidatus Rhabdochlamydia porcellionis; RKPsHep; AY223862 | Chlamydiae:Chlamydiales:unclassified_Chlamydiales                                                | 0.549      |
| Otu057 | 8               | 16   | uncultured bacterium; nbt83g01; EU538245                   | Actinobacteria:Actinobacteridae:Actinomycetales:Propionibacterineae:family                       | 0.835      |
| Otu058 | 0               | 2    | uncultured bacterium; nbw761b04c1; GQ014275                | Clostridia:Clostridiales:Clostridiales_Incertae Sedis XI:unclassified_Clostridiales_Incertae Sed | 1          |
| Otu059 | 47              | 0    | uncultured bacterium mle1-2; AF280841                      | Bacteroidia:Bacteroidales:Porphyromonadaceae:Parabacteroides                                     | 1          |
| Otu060 | 3               | 0    | uncultured bacterium; T6_3_15; EU828414                    | Bacteroidia:Bacteroidales:Bacteroidaceae:Bacteroides                                             | 0.823      |
| Otu061 | 2               | 1    | Candidatus Rhabdochlamydia porcellionis; RKPsHep; AY223862 | Chlamydiae:Chlamydiales:unclassified_Chlamydiales                                                | 0.735      |
| Otu062 | 4               | 0    | uncultured bacterium; ncd650c12c1; HM287878                | Gammaproteobacteria:Pseudomonadales:Moraxellaceae:Acinetobacter                                  | 1          |
| Otu063 | 10              | 16   | Candidatus Rhabdochlamydia porcellionis; RKPsHep; AY223862 | Chlamydiae:Chlamydiales:unclassified_Chlamydiales                                                | 0.638      |
| Otu064 | 7               | 2    | Candidatus Rhabdochlamydia porcellionis; RKPsHep; AY223862 | Chlamydiae:Chlamydiales:unclassified_Chlamydiales                                                | 0.691      |
| Otu065 | 1               | 0    | Candidatus Rhabdochlamydia porcellionis; RKPsHep; AY223862 | Chlamydiae:Chlamydiales:unclassified_Chlamydiales                                                | 0.654      |
| Otu066 | 1               | 1    | uncultured Citrobacter sp.; F1Sjun.16; GQ417179            | Gammaproteobacteria:Enterobacteriales:Enterobacteriaceae:Citrobacter                             | 0.868      |
| Otu067 | 3               | 0    | uncultured bacterium; COL_aai14b01; EU460073               | Clostridia:Clostridiales:Lachnospiraceae:unclassified_Lachnospiraceae                            | 0.795      |
| Otu068 | 6               | 0    | Aeromonas hydrophila (T); type strain: LMG 19562; AJ508765 | Gammaproteobacteria:Aeromonadales:Aeromonadaceae:Aeromonas                                       | 1          |
| Otu069 | 23              | 0    | Acetobacterium woodii (T); DSM 1030; X96954                | Clostridia:Clostridiales:Eubacteriaceae:Acetobacterium                                           | 1          |
| Otu070 | 21              | 22   | Candidatus Rhabdochlamydia porcellionis; RKPsHep; AY223862 | Chlamydiae:Chlamydiales:unclassified_Chlamydiales                                                | 0.641      |
| Otu071 | 31              | 4    | uncultured Clostridium sp.; F117; DQ232857                 | Clostridia:Clostridiales:unclassified_Clostridiales                                              | 1          |
| Otu072 | 13              | 11   | Candidatus Rhabdochlamydia porcellionis; RKPsHep; AY223862 | Chlamydiae:Chlamydiales:unclassified_Chlamydiales                                                | 0.49       |
| Otu073 | 18              | 18   | Staphylococcus caprae; DSM 20608; Y12593                   | Bacilli:Bacillales:Staphylococcaceae:Staphylococcus                                              | 1          |
| Otu074 | 9               | 19   | Candidatus Rhabdochlamydia porcellionis; RKPsHep; AY223862 | Chlamydiae:Chlamydiales:unclassified_Chlamydiales                                                | 0.641      |
| Otu075 | 30              | 0    | uncultured bacterium; NBBPI0209_14; JQ072511               | Clostridia:Clostridiales:Lachnospiraceae:Clostridium XIVb                                        | 1          |
| Otu076 | 1               | 0    | Rickettsia endosymbiont of Torix tagoi; AB066351           | Alphaproteobacteria:Rickettsiales:Rickettsiaceae:Rickettsia                                      | 0.636      |
| Otu077 | 42              | 3    | uncultured bacterium; nbu507d04c1; GQ047565                | Flavobacteria:Flavobacteriales:Flavobacteriaceae:Cloacibacterium                                 | 1          |
| Otu078 | 9               | 1    | uncultured Tolumonon sp.; R15-18; JF808898                 | Gammaproteobacteria:Aeromonadales:Aeromonadaceae:Tolumonon                                       | 1          |
| Otu079 | 5               | 4    | Candidatus Rhabdochlamydia porcellionis; RKPsHep; AY223862 | Chlamydiae:Chlamydiales:unclassified_Chlamydiales                                                | 0.636      |
| Otu080 | 9               | 2    | uncultured bacterium; bat_aaj06h08; EU463921               | Chloroplast:Chloroplast:Streptophyta                                                             | 1          |
| Otu081 | 0               | 26   | Rickettsia endosymbiont of Torix tagoi; AB066351           | Alphaproteobacteria:Rickettsiales:Rickettsiaceae:Rickettsia                                      | 0.752      |
| Otu082 | 13              | 2    | uncultured bacterium; 30g04; EF515599                      | Bacteroidia:Bacteroidales:Prevotellaceae:Prevotella                                              | 1          |

| OTU    | Number of reads |      | Taxonomy (NCBI nomenclature)                                | RDP classification                                                            | S_ab scor |
|--------|-----------------|------|-------------------------------------------------------------|-------------------------------------------------------------------------------|-----------|
|        | Wol-            | Wol+ |                                                             |                                                                               |           |
| Otu083 | 9               | 1    | uncultured actinobacterium; MspS113; AY770698               | Actinobacteria:Actinobacteridae:Actinomycetales:unclassified_Actinomycetales  | 1         |
| Otu084 | 4               | 0    | uncultured bacterium; E-23; KC835942                        | Clostridia:Clostridiales:Ruminococcaceae:unclassified_Ruminococcaceae         | 0.937     |
| Otu085 | 2               | 5    | Candidatus Rhabdochlamydia porcellionis; RKPshHep; AY223862 | Chlamydiae:Chlamydiales:unclassified_Chlamydiales                             | 0.379     |
| Otu086 | 1               | 3    | Candidatus Rhabdochlamydia porcellionis; RKPshHep; AY223862 | Chlamydiae:Chlamydiales:unclassified_Chlamydiales                             | 0.673     |
| Otu087 | 0               | 4    | Candidatus Rhabdochlamydia porcellionis; RKPshHep; AY223862 | Chlamydiae:Chlamydiales:unclassified_Chlamydiales                             | 0.66      |
| Otu088 | 13              | 10   | Candidatus Rhabdochlamydia porcellionis; RKPshHep; AY223862 | Chlamydiae:Chlamydiales:unclassified_Chlamydiales                             | 0.765     |
| Otu089 | 6               | 2    | Candidatus Rhabdochlamydia porcellionis; RKPshHep; AY223862 | Chlamydiae:Chlamydiales:unclassified_Chlamydiales                             | 0.638     |
| Otu090 | 6               | 12   | Candidatus Rhabdochlamydia porcellionis; RKPshHep; AY223862 | Chlamydiae:Chlamydiales:unclassified_Chlamydiales                             | 0.543     |
| Otu091 | 10              | 12   | Candidatus Rhabdochlamydia porcellionis; RKPshHep; AY223862 | Chlamydiae:Chlamydiales:unclassified_Chlamydiales                             | 0.507     |
| Otu092 | 4               | 2    | Candidatus Rhabdochlamydia porcellionis; RKPshHep; AY223862 | Chlamydiae:Chlamydiales:unclassified_Chlamydiales                             | 0.517     |
| Otu093 | 7               | 8    | Candidatus Rhabdochlamydia porcellionis; RKPshHep; AY223862 | Chlamydiae:Chlamydiales:unclassified_Chlamydiales                             | 0.447     |
| Otu094 | 8               | 4    | Candidatus Rhabdochlamydia porcellionis; RKPshHep; AY223862 | Chlamydiae:Chlamydiales:unclassified_Chlamydiales                             | 0.533     |
| Otu095 | 2               | 0    | Candidatus Rhabdochlamydia porcellionis; RKPshHep; AY223862 | Chlamydiae:Chlamydiales:unclassified_Chlamydiales                             | 0.418     |
| Otu096 | 1               | 0    | Rickettsia endosymbiont of Torix tagoi; AB066351            | Alphaproteobacteria:Rickettsiales:Rickettsiaceae:Rickettsia                   | 0.769     |
| Otu097 | 1               | 0    | Candidatus Rhabdochlamydia porcellionis; RKPshHep; AY223862 | Chlamydiae:Chlamydiales:unclassified_Chlamydiales                             | 0.601     |
| Otu098 | 1               | 1    | Candidatus Rhabdochlamydia porcellionis; RKPshHep; AY223862 | Chlamydiae:Chlamydiales:unclassified_Chlamydiales                             | 0.48      |
| Otu099 | 1               | 1    | Candidatus Rhabdochlamydia porcellionis; RKPshHep; AY223862 | Chlamydiae:Chlamydiales:unclassified_Chlamydiales                             | 0.438     |
| Otu100 | 1               | 3    | Candidatus Rhabdochlamydia sp. cvE88; JF513056              | Chlamydiae:Chlamydiales:unclassified_Chlamydiales                             | 0.477     |
| Otu101 | 3               | 2    | Candidatus Rhabdochlamydia porcellionis; RKPshHep; AY223862 | Chlamydiae:Chlamydiales:unclassified_Chlamydiales                             | 0.586     |
| Otu102 | 1               | 0    | Candidatus Rhabdochlamydia porcellionis; RKPshHep; AY223862 | Chlamydiae:Chlamydiales:unclassified_Chlamydiales                             | 0.579     |
| Otu103 | 0               | 3    | Candidatus Rhabdochlamydia porcellionis; RKPshHep; AY223862 | Chlamydiae:Chlamydiales:unclassified_Chlamydiales                             | 0.553     |
| Otu104 | 1               | 0    | Candidatus Rhabdochlamydia porcellionis; RKPshHep; AY223862 | Chlamydiae:Chlamydiales:unclassified_Chlamydiales                             | 0.396     |
| Otu105 | 1               | 0    | Rickettsia endosymbiont of Torix tagoi; AB066351            | Alphaproteobacteria:Rickettsiales:Rickettsiaceae:Rickettsia                   | 0.669     |
| Otu106 | 7               | 0    | uncultured bacterium; 16slp101-2g08.p1k; GQ157097           | Gammaproteobacteria:Pseudomonadales:Pseudomonadaceae:Pseudomonas              | 0.739     |
| Otu107 | 1               | 1    | Candidatus Rhabdochlamydia porcellionis; RKPshHep; AY223862 | Chlamydiae:Chlamydiales:unclassified_Chlamydiales                             | 0.48      |
| Otu108 | 1               | 1    | Candidatus Rhabdochlamydia porcellionis; RKPshHep; AY223862 | Chlamydiae:Chlamydiales:unclassified_Chlamydiales                             | 0.507     |
| Otu109 | 1               | 0    | Candidatus Rhabdochlamydia porcellionis; RKPshHep; AY223862 | Chlamydiae:Chlamydiales:unclassified_Chlamydiales                             | 0.543     |
| Otu110 | 0               | 1    | Candidatus Rhabdochlamydia porcellionis; RKPshHep; AY223862 | Chlamydiae:Chlamydiales:unclassified_Chlamydiales                             | 0.516     |
| Otu111 | 7               | 0    | Rickettsia endosymbiont of Hemiclepsis marginata; AB113215  | Alphaproteobacteria:Rickettsiales:Rickettsiaceae:Rickettsia                   | 0.669     |
| Otu112 | 1               | 2    | Candidatus Rhabdochlamydia porcellionis; RKPshHep; AY223862 | Chlamydiae:Chlamydiales:unclassified_Chlamydiales                             | 0.49      |
| Otu113 | 2               | 0    | Candidatus Rhabdochlamydia porcellionis; RKPshHep; AY223862 | Chlamydiae:Chlamydiales:unclassified_Chlamydiales                             | 0.523     |
| Otu114 | 1               | 1    | Candidatus Rhabdochlamydia porcellionis; RKPshHep; AY223862 | Chlamydiae:Chlamydiales:unclassified_Chlamydiales                             | 0.503     |
| Otu115 | 8               | 0    | Yersinia frederiksenii (T); ATCC 33641; AF366379            | Gammaproteobacteria:Enterobacteriales:Enterobacteriaceae:Yersinia             | 0.724     |
| Otu116 | 5               | 0    | Rickettsia endosymbiont of Torix tagoi; AB066351            | Alphaproteobacteria:Rickettsiales:Rickettsiaceae:Rickettsia                   | 0.829     |
| Otu117 | 2               | 1    | Candidatus Rhabdochlamydia porcellionis; RKPshHep; AY223862 | Chlamydiae:Chlamydiales:unclassified_Chlamydiales                             | 0.47      |
| Otu118 | 1               | 0    | uncultured bacterium; nbw37d10c1; GQ059570                  | Bacteroidia:Bacteroidales:Porphyromonadaceae:unclassified_Porphryomonadaceae" | 0.694     |
| Otu119 | 1               | 0    | Candidatus Rhabdochlamydia porcellionis; RKPshHep; AY223862 | Chlamydiae:Chlamydiales:unclassified_Chlamydiales                             | 0.516     |
| Otu120 | 1               | 1    | Candidatus Rhabdochlamydia porcellionis; RKPshHep; AY223862 | Chlamydiae:Chlamydiales:unclassified_Chlamydiales                             | 0.631     |
| Otu121 | 4               | 1    | Candidatus Rhabdochlamydia porcellionis; RKPshHep; AY223862 | Chlamydiae:Chlamydiales:unclassified_Chlamydiales                             | 0.507     |
| Otu122 | 2               | 2    | Candidatus Rhabdochlamydia porcellionis; RKPshHep; AY223862 | Chlamydiae:Chlamydiales:unclassified_Chlamydiales                             | 0.533     |
| Otu123 | 1               | 0    | Rickettsia endosymbiont of Torix tagoi; AB066351            | Alphaproteobacteria:Rickettsiales:Rickettsiaceae:Rickettsia                   | 0.633     |

| OTU    | Number of reads |      | Taxonomy (NCBI nomenclature)                                   | RDP classification                                                                   | S_ab scor |
|--------|-----------------|------|----------------------------------------------------------------|--------------------------------------------------------------------------------------|-----------|
|        | Wol-            | Wol+ |                                                                |                                                                                      |           |
| Otu124 | 1               | 0    | Candidatus Rhabdochlamydia porcellionis; RKPsHep; AY223862     | Chlamydiae:Chlamydiales:unclassified_Chlamydiales                                    | 0.537     |
| Otu125 | 1               | 0    | bacterium enrichment culture clone JCN13; FJ009447             | Gammaproteobacteria:Enterobacteriales:Enterobacteriaceae:Serratia                    | 0.837     |
| Otu126 | 1               | 1    | Candidatus Rhabdochlamydia porcellionis; RKPsHep; AY223862     | Chlamydiae:Chlamydiales:unclassified_Chlamydiales                                    | 0.454     |
| Otu127 | 1               | 1    | Candidatus Rhabdochlamydia porcellionis; RKPsHep; AY223862     | Chlamydiae:Chlamydiales:unclassified_Chlamydiales                                    | 0.553     |
| Otu128 | 1               | 2    | Candidatus Rhabdochlamydia porcellionis; RKPsHep; AY223862     | Chlamydiae:Chlamydiales:unclassified_Chlamydiales                                    | 0.627     |
| Otu129 | 1               | 0    | Candidatus Rhabdochlamydia porcellionis; RKPsHep; AY223862     | Chlamydiae:Chlamydiales:unclassified_Chlamydiales                                    | 0.503     |
| Otu130 | 1               | 2    | Candidatus Rhabdochlamydia porcellionis; RKPsHep; AY223862     | Chlamydiae:Chlamydiales:unclassified_Chlamydiales                                    | 0.5       |
| Otu131 | 1               | 0    | Candidatus Rhabdochlamydia porcellionis; RKPsHep; AY223862     | Chlamydiae:Chlamydiales:unclassified_Chlamydiales                                    | 0.553     |
| Otu132 | 81              | 0    | Clostridium herbivorans (T); 54408; L34418                     | Clostridia:Clostridiales:Lachnospiraceae:Clostridium XLIVa                           | 1         |
| Otu133 | 0               | 1    | Pseudoalteromonas sp. D17; AY582935                            | Gammaproteobacteria:Alteromonadales:Pseudoalteromonadaceae:Pseudoalteromonas         | 0.893     |
| Otu134 | 0               | 1    | Hyphomicrobium sp. wp14; AJ551095                              | Gammaproteobacteria:Pseudomonadales:Moraxellaceae:Psychrobacter                      | 1         |
| Otu135 | 5               | 2    | bacterium SRMC-52-8; DQ104970                                  | Betaproteobacteria:Burkholderiales:Comamonadaceae:Comamonas                          | 1         |
| Otu136 | 8               | 0    | uncultured bacterium; C9.26; GU559765                          | Clostridia:Clostridiales:Lachnospiraceae:Butyrivibrio                                | 1         |
| Otu137 | 2               | 4    | Candidatus Rhabdochlamydia porcellionis; RKPsHep; AY223862     | Chlamydiae:Chlamydiales:unclassified_Chlamydiales                                    | 0.608     |
| Otu138 | 1               | 4    | Sphingobacterium multivorum (T); IAM14316; AB100738            | Sphingobacteria:Sphingobacteriales:Sphingobacteriaceae:Sphingobacterium              | 0.912     |
| Otu139 | 5               | 0    | uncultured bacterium; C10; DQ856517                            | Bacteroidia:Bacteroidales:Porphyromonadaceae:Dysgonomonas                            | 0.959     |
| Otu140 | 0               | 3    | Brachybacterium faecium; DSM 4810; X91032                      | Actinobacteria:Actinobacteridae:Actinomycetales:Micrococcineae:family                | 1         |
| Otu141 | 1               | 0    | uncultured bacterium; T6_3_15; EU828414                        | Bacteroidia:Bacteroidales:Bacteroidaceae:Bacteroides                                 | 0.789     |
| Otu142 | 0               | 4    | Rhodococcus fascians; DSM 43673; X79187                        | Actinobacteria:Actinobacteridae:Actinomycetales:Corynebacterineae:family             | 1         |
| Otu143 | 1               | 0    | Candidatus Rhabdochlamydia porcellionis; RKPsHep; AY223862     | Chlamydiae:Chlamydiales:unclassified_Chlamydiales                                    | 0.461     |
| Otu144 | 3               | 0    | Nitrosomonas ureae; AF272414                                   | Betaproteobacteria:Nitrosomonadales:Nitrosomonadaceae:unclassified_Nitrosomonadaceae | 0.96      |
| Otu145 | 1               | 0    | uncultured bacterium; nbw731d05c1; GQ066992                    | Bacteroidia:Bacteroidales:Porphyromonadaceae:unclassified_Porphryomonadaceae"        | 0.671     |
| Otu146 | 0               | 3    | Alcaligenes sp. TS-MOSK-6; AB234302                            | Betaproteobacteria:Burkholderiales:Alcaligenaceae:Achromobacter:                     | 0.961     |
| Otu147 | 2               | 0    | uncultured bacterium; nbw37d10c1; GQ059570                     | Bacteroidia:Bacteroidales:Porphyromonadaceae:unclassified_Porphryomonadaceae"        | 0.912     |
| Otu148 | 4               | 3    | alpha proteobacterium S22-37; AM932270                         | Alphaproteobacteria:Rhizobiales:unclassified_Rhizobiales                             | 0.527     |
| Otu149 | 1               | 0    | uncultured Xanthomonadaceae bacterium; AMEG10; AM935344        | Gammaproteobacteria:Xanthomonadales:Sinobacteraceae:unclassified_Sinobacteraceae     | 0.933     |
| Otu150 | 1               | 0    | uncultured Nocardiodaceae bacterium; Elev_16S_388; EF019220    | Actinobacteria:Actinobacteridae:Actinomycetales:Propionibacterineae:family           | 1         |
| Otu151 | 3               | 0    | uncultured bacterium; LNR A2-4; DQ988257                       | Gammaproteobacteria:Pseudomonadales:Pseudomonadaceae:Pseudomonas                     | 0.843     |
| Otu152 | 5               | 0    | Wolinella succinogenes (T); ATCC 29543; M88159                 | Epsilonproteobacteria:Campylobacteriales:Helicobacteraceae:Wolinella                 | 1         |
| Otu153 | 1               | 0    | Candidatus Rhabdochlamydia sp. cvE88; JF513056                 | Chlamydiae:Chlamydiales:unclassified_Chlamydiales                                    | 0.549     |
| Otu154 | 0               | 1    | Candidatus Rhabdochlamydia porcellionis; RKPsHep; AY223862     | Chlamydiae:Chlamydiales:unclassified_Chlamydiales                                    | 0.366     |
| Otu155 | 4               | 0    | Lactobacillus fornicalis (T); TV1018; Y18654                   | Bacilli:Lactobacillales:Lactobacillaceae:Lactobacillus                               | 1         |
| Otu156 | 0               | 1    | uncultured bacterium; N913; AY975480                           | Betaproteobacteria:Burkholderiales:Sutterellaceae:Parasutterella                     | 1         |
| Otu157 | 1               | 0    | Rickettsia endosymbiont of Torix tagoi; AB066351               | Alphaproteobacteria:Rickettsiales:Rickettsiaceae:Rickettsia                          | 0.742     |
| Otu158 | 1               | 0    | uncultured bacterium; 16slp112-2h09.p1k; GQ158172              | Clostridia:Clostridiales:Lachnospiraceae:Lachnospiraceae_incertae_sedis              | 0.867     |
| Otu159 | 0               | 1    | Tepidimonas arfidensis; AB206468                               | Betaproteobacteria:Burkholderiales:Burkholderiales_incertae_sedis:Tepidimonas        | 1         |
| Otu160 | 6               | 3    | uncultured alpha proteobacterium; JG37-AG-18; AJ518765         | Alphaproteobacteria:Sphingomonadales:Sphingomonadaceae:Sphingomonas                  | 1         |
| Otu161 | 0               | 2    | Candidatus Rhabdochlamydia porcellionis; RKPsHep; AY223862     | Chlamydiae:Chlamydiales:unclassified_Chlamydiales                                    | 0.68      |
| Otu162 | 1               | 1    | Candidatus Rhabdochlamydia porcellionis; RKPsHep; AY223862     | Chlamydiae:Chlamydiales:unclassified_Chlamydiales                                    | 0.586     |
| Otu163 | 2               | 1    | Firmicutes oral clone BX005; AY005049                          | Bacilli:Lactobacillales:Carnobacteriaceae:Atopostipes                                | 1         |
| Otu164 | 1               | 0    | uncultured bacterium; Winter_MachineA&B_HEPAoff_4a01; FJ658472 | Alphaproteobacteria:Rhizobiales:Brucellaceae:Ochrobactrum                            | 0.953     |

| OTU    | Number of reads |      | Taxonomy (NCBI nomenclature)                                       | RDP classification                                                               | S_ab scor |
|--------|-----------------|------|--------------------------------------------------------------------|----------------------------------------------------------------------------------|-----------|
|        | Wol-            | Wol+ |                                                                    |                                                                                  |           |
| Otu165 | 2               | 0    | Peptoniphilus duerdenii ATCC BAA-1640; WAL 1998L; EU526290         | Clostridia:Clostridiales:Clostridiales_Incertae Sedis XI:Peptoniphilus           | 1         |
| Otu166 | 6               | 0    | uncultured bacterium; nbw37d10c1; GQ059570                         | Bacteroidia:Bacteroidales:Porphyromonadaceae:unclassified_"Porphyromonadaceae"   | 0.932     |
| Otu167 | 3               | 0    | uncultured bacterium; HuAC20; AY684401                             | Negativicutes:Selenomonadales:Veillonellaceae:unclassified_Veillonellaceae       | 1         |
| Otu168 | 2               | 0    | uncultured bacterium; copi29; AY563456                             | Negativicutes:Selenomonadales:Acidaminococcaceae:unclassified_Acidaminococcaceae | 1         |
| Otu169 | 1               | 0    | Serratia marcescens; SA Ant16; AY551938                            | Gammaproteobacteria:Enterobacteriales:Enterobacteriaceae:Serratia                | 0.849     |
| Otu170 | 4               | 0    | uncultured organism; ELU0144-T169-S-IIPCRAMgANa_000147; HQ799464   | Clostridia:Clostridiales:unclassified_Clostridiales                              | 0.984     |
| Otu171 | 2               | 0    | Brevibacterium paucivorans (T); CF 62; AJ251463                    | Actinobacteria:Actinobacteridae:Actinomycetales:Micrococcineae:family            | 1         |
| Otu172 | 0               | 1    | Candidatus Rhabdochlamydia porcellionis; RKPsHep; AY223862         | Chlamydiae:Chlamydiales:unclassified_Chlamydiales                                | 0.351     |
| Otu173 | 2               | 0    | Anaerococcus burkinensis (T); DSM 6283(T); AJ010961                | Negativicutes:Selenomonadales:Veillonellaceae:Anaerococcus                       | 1         |
| Otu174 | 1               | 0    | uncultured Tolumonas sp.; R15-18; JF808898                         | Gammaproteobacteria:Aeromonadales:Aeromonadaceae:Tolumonas                       | 0.921     |
| Otu175 | 1               | 0    | uncultured bacterium; K78S4_31f06; EU455391                        | Clostridia:Clostridiales:Lachnospiraceae:unclassified_Lachnospiraceae            | 0.945     |
| Otu176 | 0               | 1    | uncultured marine bacterium; BM1-1-48; FJ825816                    | Gammaproteobacteria:Oceanospirillales:Halomonadaceae:Halomonas                   | 0.98      |
| Otu177 | 2               | 0    | uncultured bacterium; nbw37d10c1; GQ059570                         | Bacteroidia:Bacteroidales:Porphyromonadaceae:unclassified_"Porphyromonadaceae"   | 0.864     |
| Otu178 | 1               | 0    | Candidatus Rhabdochlamydia porcellionis; RKPsHep; AY223862         | Chlamydiae:Chlamydiales:unclassified_Chlamydiales                                | 0.373     |
| Otu179 | 0               | 7    | Tsakumurella spumae (T); M. Goodfellow N1171 (type strain); Z37150 | Actinobacteria:Actinobacteridae:Actinomycetales:Corynebacterineae:family         | 1         |
| Otu180 | 2               | 0    | Enterobacter sp. 2390; JX174267                                    | Gammaproteobacteria:Enterobacteriales:Enterobacteriaceae:Enterobacter            | 0.804     |
| Otu181 | 3               | 0    | Leuconostoc carnosum (T); NRIC 1722; AB022925                      | Bacilli:Lactobacillales:Leuconostocaceae:Leuconostoc                             | 1         |
| Otu182 | 1               | 0    | uncultured bacterium; 03f06; GQ132402                              | Clostridia:Clostridiales:Ruminococcaceae:Acetivibrio                             | 0.819     |
| Otu183 | 2               | 2    | Nocardioides sp. 2_4V; EF540473                                    | Actinobacteria:Actinobacteridae:Actinomycetales:Propionibacterineae:family       | 1         |
| Otu184 | 0               | 0    | Sphingomonas sp. MN 122.2a; AJ313019                               | Alphaproteobacteria:Sphingomonadales:Sphingomonadaceae:Sphingomonas              | 1         |
| Otu185 | 5               | 2    | Candidatus Rhabdochlamydia porcellionis; RKPsHep; AY223862         | Chlamydiae:Chlamydiales:unclassified_Chlamydiales                                | 0.775     |
| Otu186 | 1               | 0    | Candidatus Rhabdochlamydia porcellionis; RKPsHep; AY223862         | Chlamydiae:Chlamydiales:unclassified_Chlamydiales                                | 0.658     |
| Otu187 | 0               | 1    | Rickettsia endosymbiont of Torix tagoi; AB066351                   | Alphaproteobacteria:Rickettsiales:Rickettsiaceae:Rickettsia                      | 0.682     |
| Otu188 | 1               | 0    | Candidatus Rhabdochlamydia porcellionis; RKPsHep; AY223862         | Chlamydiae:Chlamydiales:unclassified_Chlamydiales                                | 0.601     |
| Otu189 | 1               | 0    | Rickettsia endosymbiont of Torix tagoi; AB066351                   | Alphaproteobacteria:Rickettsiales:Rickettsiaceae:Rickettsia                      | 0.773     |
| Otu190 | 0               | 1    | Rickettsia endosymbiont of Torix tagoi; AB066351                   | Alphaproteobacteria:Rickettsiales:Rickettsiaceae:Rickettsia                      | 0.727     |
| Otu191 | 1               | 0    | Candidatus Rhabdochlamydia porcellionis; RKPsHep; AY223862         | Chlamydiae:Chlamydiales:unclassified_Chlamydiales                                | 0.575     |
| Otu192 | 0               | 1    | uncultured bacterium; AFEL_iai30e03; EU464518                      | Gammaproteobacteria:Enterobacteriales:Enterobacteriaceae:Escherichia/Shigella    | 0.758     |
| Otu193 | 9               | 0    | uncultured bacterium; K559; AY976911                               | Clostridia:Clostridiales:Ruminococcaceae:unclassified_Ruminococcaceae            | 1         |
| Otu194 | 0               | 1    | Cobetia marina (T); DSM 4741; AJ306890                             | Gammaproteobacteria:Oceanospirillales:Halomonadaceae:Cobetia                     | 0.953     |
| Otu195 | 0               | 1    | uncultured bacterium; D-66; AY676491                               | Actinobacteria:Actinobacteridae:Actinomycetales:Propionibacterineae:family       | 1         |
| Otu196 | 1               | 0    | Candidatus Rhabdochlamydia porcellionis; RKPsHep; AY223862         | Chlamydiae:Chlamydiales:unclassified_Chlamydiales                                | 0.529     |
| Otu197 | 2               | 0    | Shewanella putrefaciens; AB057660                                  | Gammaproteobacteria:Alteromonadales:Shewanellaceae:Shewanella                    | 1         |
| Otu198 | 0               | 1    | Candidatus Rhabdochlamydia porcellionis; RKPsHep; AY223862         | Chlamydiae:Chlamydiales:unclassified_Chlamydiales                                | 0.467     |
| Otu199 | 4               | 0    | unidentified bacterium; LWSR-14; AY345543                          | Alphaproteobacteria:Kiloniellales:Kiloniellaceae:Kiloniella                      | 0.719     |
| Otu200 | 0               | 1    | Candidatus Rhabdochlamydia porcellionis; RKPsHep; AY223862         | Chlamydiae:Chlamydiales:unclassified_Chlamydiales                                | 0.634     |
| Otu201 | 1               | 0    | uncultured bacterium; T6_3_15; EU828414                            | Bacteroidia:Bacteroidales:Bacteroidaceae:Bacteroides                             | 0.646     |
| Otu202 | 0               | 2    | unidentified eubacterium clone FJ21-A; U27856                      | Actinobacteria:Actinobacteridae:Actinomycetales:Propionibacterineae:family       | 1         |
| Otu203 | 1               | 0    | Tepidimonas aquatica (T); CLN-1; AY324139                          | Betaproteobacteria:Burkholderiales:Burkholderiales_incertae_sedis:Tepidimonas    | 0.974     |
| Otu204 | 1               | 0    | Kocuria varians (T); DSM 20033; X87754                             | Actinobacteria:Actinobacteridae:Actinomycetales:Micrococcineae:family            | 0.969     |
| Otu205 | 1               | 0    | Candidatus Rhabdochlamydia porcellionis; RKPsHep; AY223862         | Chlamydiae:Chlamydiales:unclassified_Chlamydiales                                | 0.507     |

| OTU    | Number of reads |      | Taxonomy (NCBI nomenclature)                                  | RDP classification                                                    | S_ab score |
|--------|-----------------|------|---------------------------------------------------------------|-----------------------------------------------------------------------|------------|
|        | Wol-            | Wol+ |                                                               |                                                                       |            |
| Otu206 | 1               | 0    | uncultured bacterium; p-2370-55G5; AF371474                   | Bacilli:Lactobacillales:Lactobacillaceae:Lactobacillus                | 0.953      |
| Otu207 | 0               | 1    | Rickettsia endosymbiont of Torix tagoi; AB066351              | Alphaproteobacteria:Rickettsiales:Rickettsiaceae:Rickettsia           | 0.47       |
| Otu208 | 0               | 1    | Curtobacterium pusillum (T); type strain: DSM 20527; AJ784400 | Actinobacteria:Actinobacteridae:Actinomycetales:Micrococcineae:family | 1          |
| Otu209 | 1               | 0    | Candidatus Rhabdochlamydia porcellionis; RKPshp; AY223862     | Chlamydiae:Chlamydiales:unclassified_Chlamydiales                     | 0.418      |
| Otu210 | 1               | 0    | Streptococcus sp. oral clone FN051; AF432135                  | Bacilli:Lactobacillales:Streptococcaceae:Streptococcus                | 1          |
