# Supplementary material for: Endosymbiont Dominated Bacterial Communities in a Dwarf Spider
Source: PubMed Central journal article supplement (PMC4338242; doi:10.1371/journal.pone.0117297), 2015-02-23
Supplement: pone.0117297.s005.pdf [file pone.0117297.s005.pdf]

| OTU    | Number of reads |        |        |        | Taxonomy (NCBI nomenclature)                                          | RDP classification                                                                                                                                                             | S_ab score |
|--------|-----------------|--------|--------|--------|-----------------------------------------------------------------------|--------------------------------------------------------------------------------------------------------------------------------------------------------------------------------|------------|
|        | Wol-            | Wol+   | DAM    | WAL    |                                                                       |                                                                                                                                                                                |            |
| Otu001 | 0               | 0      | 123    | 104    | uncultured bacterium; 27RHU14; AJ863339                               | environmental samples:unclassified_environmental samples                                                                                                                       | 1          |
| Otu002 | 369741          | 838377 | 651    | 771800 | uncultured Candidatus Rhabdochlamydia sp.; KF-9; EF445478             | Chlamydiae/Verrucomicrobia group:Chlamydiae:Chlamydia:Chlamydiales:Rhabdochlamydiae:Candidatus Rhabdochlamydia                                                                 | 0.833      |
| Otu003 | 113086          | 97931  | 415845 | 118093 | endosymbiont of Brevipalpus obovatus; AY279401                        | Bacteroidetes/Chlorobi group:Bacteroidetes:unclassified Bacteroidetes:unclassified Bacteroidetes (miscellaneous):unclassified_unclassified Bacteroidetes (miscellaneous)       | 0.909      |
| Otu004 | 11              | 19     | 303654 | 79     | uncultured Acinetobacter sp.; 91_11; AF467306                         | Proteobacteria:Gammaproteobacteria:Pseudomonadales:Moraxellaceae:Acinetobacter                                                                                                 | 1          |
| Otu005 | 67993           | 12641  | 102503 | 93446  | Rickettsia endosymbiont of Asobara tabida; At-R; FJ603467             | Proteobacteria:Alphaproteobacteria:Rickettsiales:Rickettsiaceae:Rickettsiae:Rickettsia                                                                                         | 1          |
| Otu006 | 0               | 2      | 4      | 27     | uncultured Candidatus Rhabdochlamydia sp.; KF-9; EF445478             | Chlamydiae/Verrucomicrobia group:Chlamydiae:Chlamydia:Chlamydiales:Rhabdochlamydiae:Candidatus Rhabdochlamydia                                                                 | 0.442      |
| Otu007 | 3               | 64870  | 166081 | 92371  | Wolbachia sp.; X87407                                                 | Proteobacteria:Alphaproteobacteria:Rickettsiales:Anaplasmataceae:Wolbachiae:Wolbachia                                                                                          | 1          |
| Otu008 | 8               | 438    | 812    | 535    | Wolbachia symbiont of Icerya purchasi; EU727127                       | Proteobacteria:Alphaproteobacteria:Rickettsiales:Anaplasmataceae:Wolbachiae:Wolbachia                                                                                          | 0.632      |
| Otu009 | 0               | 0      | 1      | 0      | uncultured bacterium; CL11; FN567051                                  | environmental samples:unclassified_environmental samples                                                                                                                       | 0.316      |
| Otu010 | 238             | 459    | 9      | 515    | uncultured bacterium; GP27685CO3; JN850423                            | environmental samples:unclassified_environmental samples                                                                                                                       | 0.466      |
| Otu011 | 364             | 827    | 6      | 786    | uncultured Candidatus Rhabdochlamydia sp.; KF-9; EF445478             | Chlamydiae/Verrucomicrobia group:Chlamydiae:Chlamydia:Chlamydiales:Rhabdochlamydiae:Candidatus Rhabdochlamydia                                                                 | 0.548      |
| Otu012 | 0               | 0      | 0      | 4      | uncultured bacterium; 16saw137-3e01; GU241561                         | environmental samples:unclassified_environmental samples                                                                                                                       | 0.813      |
| Otu013 | 7               | 1      | 13     | 8      | Rickettsia endosymbiont of Asobara tabida; At-R; FJ603467             | Proteobacteria:Alphaproteobacteria:Rickettsiales:Rickettsiaceae:Rickettsiae:Rickettsia                                                                                         | 0.604      |
| Otu014 | 0               | 0      | 1      | 0      | Acinetobacter sp. TDW13; B05; GU003823                                | Proteobacteria:Gammaproteobacteria:Pseudomonadales:Moraxellaceae:Acinetobacter                                                                                                 | 0.423      |
| Otu015 | 0               | 2      | 70     | 129    | Brevundimonas vesicularis; IC511202; AY456200                         | Proteobacteria:Alphaproteobacteria:Caulobacteriales:Caulobacteraceae:Brevundimonas                                                                                             | 1          |
| Otu016 | 18              | 61     | 3      | 54     | uncultured Candidatus Rhabdochlamydia sp.; KF-9; EF445478             | Chlamydiae/Verrucomicrobia group:Chlamydiae:Chlamydia:Chlamydiales:Rhabdochlamydiae:Candidatus Rhabdochlamydia                                                                 | 0.404      |
| Otu017 | 0               | 0      | 3      | 0      | Acinetobacter sp. 2PH11; HF936996                                     | Proteobacteria:Gammaproteobacteria:Pseudomonadales:Moraxellaceae:Acinetobacter                                                                                                 | 0.545      |
| Otu018 | 0               | 0      | 19     | 575    | uncultured bacterium; 27RHU38; AJ863317                               | environmental samples:unclassified_environmental samples                                                                                                                       | 0.917      |
| Otu019 | 0               | 0      | 233    | 0      | uncultured gamma proteobacterium; 24HbSt113_AAB; EF534517             | Proteobacteria:Gammaproteobacteria:environmental samples:unclassified_environmental samples                                                                                    | 0.675      |
| Otu020 | 77              | 193    | 2      | 190    | uncultured Candidatus Rhabdochlamydia sp.; KF-9; EF445478             | Chlamydiae/Verrucomicrobia group:Chlamydiae:Chlamydia:Chlamydiales:Rhabdochlamydiae:Candidatus Rhabdochlamydia                                                                 | 0.673      |
| Otu021 | 0               | 0      | 326    | 0      | Acinetobacter haemolyticus (T); DSM 6962; X81662                      | Proteobacteria:Gammaproteobacteria:Pseudomonadales:Moraxellaceae:Acinetobacter                                                                                                 | 0.567      |
| Otu022 | 0               | 0      | 5      | 3      | uncultured bacterium; Stegobium_mycetome_symbiont; JQ805029           | environmental samples:unclassified_environmental samples                                                                                                                       | 0.619      |
| Otu023 | 7               | 10     | 3      | 11     | uncultured Candidatus Rhabdochlamydia sp.; KF-9; EF445478             | Chlamydiae/Verrucomicrobia group:Chlamydiae:Chlamydia:Chlamydiales:Rhabdochlamydiae:Candidatus Rhabdochlamydia                                                                 | 0.545      |
| Otu024 | 4               | 1      | 6      | 2      | uncultured bacterium; Stegobium_mycetome_symbiont; JQ805029           | environmental samples:unclassified_environmental samples                                                                                                                       | 0.615      |
| Otu025 | 68              | 0      | 2      | 533    | uncultured bacterium; LM12-2; DQ443901                                | environmental samples:unclassified_environmental samples                                                                                                                       | 0.795      |
| Otu026 | 2               | 1      | 10     | 1      | uncultured Firmicutes bacterium; CTF3-179; GU958139                   | Firmicutes:environmental samples:unclassified_environmental samples                                                                                                            | 0.288      |
| Otu027 | 1               | 5      | 9      | 4      | uncultured Candidatus Rhabdochlamydia sp.; KF-9; EF445478             | Chlamydiae/Verrucomicrobia group:Chlamydiae:Chlamydia:Chlamydiales:Rhabdochlamydiae:Candidatus Rhabdochlamydia                                                                 | 0.632      |
| Otu028 | 0               | 0      | 3      | 2      | endosymbiont of Brevipalpus obovatus; AY279401                        | Bacteroidetes/Chlorobi group:Bacteroidetes:unclassified Bacteroidetes:unclassified Bacteroidetes (miscellaneous):unclassified_unclassified Bacteroidetes (miscellaneous)       | 0.282      |
| Otu029 | 6               | 6      | 4      | 6      | uncultured Candidatus Rhabdochlamydia sp.; KF-9; EF445478             | Chlamydiae/Verrucomicrobia group:Chlamydiae:Chlamydia:Chlamydiales:Rhabdochlamydiae:Candidatus Rhabdochlamydia                                                                 | 0.391      |
| Otu030 | 0               | 1      | 6      | 3      | Rickettsia endosymbiont of Nuclearia pattersoni; AY364636             | Proteobacteria:Alphaproteobacteria:Rickettsiales:Rickettsiaceae:Rickettsiae:Rickettsia                                                                                         | 0.471      |
| Otu031 | 114             | 280    | 1      | 293    | uncultured Candidatus Rhabdochlamydia sp.; KF-9; EF445478             | Chlamydiae/Verrucomicrobia group:Chlamydiae:Chlamydia:Chlamydiales:Rhabdochlamydiae:Candidatus Rhabdochlamydia                                                                 | 0.462      |
| Otu032 | 0               | 0      | 4      | 1      | uncultured bacterium; LaC15L115; EF667561                             | environmental samples:unclassified_environmental samples                                                                                                                       | 0.458      |
| Otu033 | 89              | 10     | 119    | 126    | uncultured alpha proteobacterium; I-DW-126; GQ453070                  | Proteobacteria:Alphaproteobacteria:environmental samples:unclassified_environmental samples                                                                                    | 0.558      |
| Otu034 | 0               | 0      | 3335   | 12     | uncultured gamma proteobacterium; 24HbSt113_AAB; EF534517             | Proteobacteria:Gammaproteobacteria:environmental samples:unclassified_environmental samples                                                                                    | 0.917      |
| Otu035 | 0               | 0      | 1      | 0      | uncultured epsilon proteobacterium; pMAR806_10; AB496506              | Proteobacteria:delta/epsilon subdivisions:Epsilonproteobacteria:environmental samples:unclassified_environmental samples                                                       | 0.432      |
| Otu036 | 3               | 0      | 12     | 6      | Rickettsia endosymbiont of Asobara tabida; At-R; FJ603467             | Proteobacteria:Alphaproteobacteria:Rickettsiales:Rickettsiaceae:Rickettsiae:Rickettsia                                                                                         | 0.561      |
| Otu037 | 17              | 7      | 84     | 32     | Rickettsia endosymbiont of Nuclearia pattersoni; AY364636             | Proteobacteria:Alphaproteobacteria:Rickettsiales:Rickettsiaceae:Rickettsiae:Rickettsia                                                                                         | 0.497      |
| Otu038 | 8               | 13     | 0      | 18     | uncultured Candidatus Rhabdochlamydia sp.; KF-9; EF445478             | Chlamydiae/Verrucomicrobia group:Chlamydiae:Chlamydia:Chlamydiales:Rhabdochlamydiae:Candidatus Rhabdochlamydia                                                                 | 0.442      |
| Otu039 | 0               | 2      | 351    | 0      | uncultured bacterium; R4J7T4_C12; GQ468031                            | environmental samples:unclassified_environmental samples                                                                                                                       | 0.723      |
| Otu040 | 0               | 0      | 9      | 0      | uncultured Acinetobacter sp.; 91_18; AF467295                         | Proteobacteria:Gammaproteobacteria:Pseudomonadales:Moraxellaceae:Acinetobacter                                                                                                 | 0.654      |
| Otu041 | 0               | 0      | 10     | 0      | Acinetobacter sp. SMCC B0472; U87132                                  | Proteobacteria:Gammaproteobacteria:Pseudomonadales:Moraxellaceae:Acinetobacter                                                                                                 | 0.645      |
| Otu042 | 0               | 0      | 139    | 1      | bacterium UASWS0069; DQ190282                                         | unclassified Bacteria (miscellaneous):unclassified_unclassified Bacteria (miscellaneous)                                                                                       | 0.647      |
| Otu043 | 0               | 0      | 14     | 0      | uncultured gamma proteobacterium; TH1-3; AM690808                     | Proteobacteria:Gammaproteobacteria:environmental samples:unclassified_environmental samples                                                                                    | 0.712      |
| Otu044 | 2               | 1      | 28     | 5      | uncultured alpha proteobacterium; I-DW-126; GQ453070                  | Proteobacteria:Alphaproteobacteria:environmental samples:unclassified_environmental samples                                                                                    | 0.5        |
| Otu045 | 0               | 1      | 1      | 0      | uncultured bacterium; Amsterdam-2B-71; BC20-2B-71; AY592427           | environmental samples:unclassified_environmental samples                                                                                                                       | 0.484      |
| Otu046 | 9               | 14     | 8      | 36     | uncultured Candidatus Rhabdochlamydia sp.; KF-9; EF445478             | Chlamydiae/Verrucomicrobia group:Chlamydiae:Chlamydia:Chlamydiales:Rhabdochlamydiae:Candidatus Rhabdochlamydia                                                                 | 0.555      |
| Otu047 | 0               | 0      | 3      | 0      | uncultured bacterium; 0702007J19DMCFE10923; GU369404                  | environmental samples:unclassified_environmental samples                                                                                                                       | 0.59       |
| Otu048 | 1               | 0      | 3      | 0      | uncultured bacterium; MW_62; HQ910898                                 | environmental samples:unclassified_environmental samples                                                                                                                       | 0.39       |
| Otu049 | 4               | 4      | 2      | 10     | uncultured Candidatus Rhabdochlamydia sp.; KF-9; EF445478             | Chlamydiae/Verrucomicrobia group:Chlamydiae:Chlamydia:Chlamydiales:Rhabdochlamydiae:Candidatus Rhabdochlamydia                                                                 | 0.622      |
| Otu050 | 0               | 0      | 0      | 17     | uncultured planctomycete; Upland_8_781; JF981504                      | Planctomycetes:Planctomycetia:Planctomycetales:environmental samples:unclassified_environmental samples                                                                        | 0.812      |
| Otu051 | 0               | 0      | 9      | 26     | uncultured bacterium; 27RHU14; AJ863339                               | environmental samples:unclassified_environmental samples                                                                                                                       | 0.918      |
| Otu052 | 0               | 0      | 2      | 1      | Rickettsia endosymbiont of Nuclearia pattersoni; AY364636             | Proteobacteria:Alphaproteobacteria:Rickettsiales:Rickettsiaceae:Rickettsiae:Rickettsia                                                                                         | 0.538      |
| Otu053 | 2               | 0      | 1      | 3      | Rickettsia endosymbiont of Asobara tabida; At-R; FJ603467             | Proteobacteria:Alphaproteobacteria:Rickettsiales:Rickettsiaceae:Rickettsiae:Rickettsia                                                                                         | 0.5        |
| Otu054 | 0               | 0      | 0      | 24     | uncultured bacterium; e10; AB241562                                   | environmental samples:unclassified_environmental samples                                                                                                                       | 1          |
| Otu055 | 0               | 0      | 64     | 0      | uncultured bacterium; DNA-R3-A2; JN885829                             | environmental samples:unclassified_environmental samples                                                                                                                       | 0.712      |
| Otu056 | 0               | 0      | 2      | 0      | uncultured bacterium; G910P31FN13.T0; EU172165                        | environmental samples:unclassified_environmental samples                                                                                                                       | 0.571      |
| Otu057 | 0               | 2      | 0      | 4      | uncultured Candidatus Rhabdochlamydia sp.; KF-9; EF445478             | Chlamydiae/Verrucomicrobia group:Chlamydiae:Chlamydia:Chlamydiales:Rhabdochlamydiae:Candidatus Rhabdochlamydia                                                                 | 0.5        |
| Otu058 | 2               | 5      | 0      | 131    | beta proteobacterium endosymbiont of Nesophrosyne sp.; 185n; JX433927 | Proteobacteria:Betaproteobacteria:unclassified Betaproteobacteria:unclassified Betaproteobacteria (miscellaneous):unclassified_unclassified Betaproteobacteria (miscellaneous) | 0.266      |
| Otu059 | 0               | 0      | 0      | 47     | uncultured bacterium; JJ183; JN004301                                 | environmental samples:unclassified_environmental samples                                                                                                                       | 1          |
| Otu060 | 1               | 5      | 50     | 124    | aquatic bacterium R1-G3; AB195770                                     | unclassified Bacteria:unclassified Bacteria (miscellaneous):unclassified_unclassified Bacteria (miscellaneous)                                                                 | 1          |
| Otu061 | 6               | 1      | 8      | 9      | uncultured alpha proteobacterium; I-DW-126; GQ453070                  | Proteobacteria:Alphaproteobacteria:environmental samples:unclassified_environmental samples                                                                                    | 0.461      |
| Otu062 | 0               | 0      | 0      | 42     | agricultural soil bacterium SI-3; AJ252573                            | unclassified Bacteria:unclassified Bacteria (miscellaneous):unclassified_unclassified Bacteria (miscellaneous)                                                                 | 1          |
| Otu063 | 12              | 1      | 25     | 15     | Rickettsia endosymbiont of Asobara tabida; At-R; FJ603467             | Proteobacteria:Alphaproteobacteria:Rickettsiales:Rickettsiaceae:Rickettsiae:Rickettsia                                                                                         | 0.609      |
| Otu064 | 0               | 0      | 14     | 165    | uncultured actinobacterium; SL12a-2/11; GU194255                      | Actinobacteria:Actinobacteria:environmental samples:unclassified_environmental samples                                                                                         | 0.658      |
| Otu065 | 5               | 17     | 1      | 23     | uncultured Candidatus Rhabdochlamydia sp.; KF-9; EF445478             | Chlamydiae/Verrucomicrobia group:Chlamydiae:Chlamydia:Chlamydiales:Rhabdochlamydiae:Candidatus Rhabdochlamydia                                                                 | 0.542      |
| Otu066 | 5               | 19     | 27     | 24     | uncultured bacterium; Ob3-7_01; AJ880257                              | environmental samples:unclassified_environmental samples                                                                                                                       | 0.712      |
| Otu067 | 1               | 2      | 4      | 5      | uncultured bacterium; macon_g23; DQ981015                             | environmental samples:unclassified_environmental samples                                                                                                                       | 0.451      |
| Otu068 | 0               | 0      | 69     | 0      | bacterium UASWS0069; DQ190282                                         | unclassified Bacteria:unclassified Bacteria (miscellaneous):unclassified_unclassified Bacteria (miscellaneous)                                                                 | 0.692      |

| OTU    | Number of reads |      |     |     | Taxonomy (NCBI nomenclature)                                              | RDP classification                                                                                                                                             | S_ab score |
|--------|-----------------|------|-----|-----|---------------------------------------------------------------------------|----------------------------------------------------------------------------------------------------------------------------------------------------------------|------------|
|        | Wol-            | Wol+ | DAM | WAL |                                                                           |                                                                                                                                                                |            |
| Otu069 | 0               | 0    | 3   |     | 0 uncultured gamma proteobacterium; 24HaSt13_AAB; EF534516                | Proteobacteria:Gammaproteobacteria:environmental samples:unclassified_environmental samples                                                                    | 0.718      |
| Otu070 | 0               | 0    | 310 |     | 34 uncultured microorganism; SeaGull37; EU181042                          | unclassified_environmental samples                                                                                                                             | 0.865      |
| Otu071 | 1               | 0    | 0   |     | 1 uncultured Candidatus Rhodochlamydia sp.; KF-9; EF445478                | Chlamydiae/Verrucomicrobia group:Chlamydiae:Chlamydia:Chlamydiales:Rhodochlamydiaceae:Candidatus Rhodochlamydia                                                | 0.442      |
| Otu072 | 3               | 0    | 13  |     | 13 uncultured Clostridia bacterium; WS07B1_G10; DQ171449                  | Firmicutes:Clostridia:environmental samples:unclassified_environmental samples                                                                                 | 0.799      |
| Otu073 | 3               | 0    | 9   |     | 30 Stenotrophomonas maltophilia; CC-S8818F1; AY337582                     | Proteobacteria:Gammaproteobacteria:Xanthomonadales:Xanthomonadales:Stenotrophomonas                                                                            | 1          |
| Otu074 | 0               | 0    | 19  |     | 3 uncultured Serratia sp.; FC91; FJ608330                                 | Proteobacteria:Gammaproteobacteria:Enterobacteriales:Enterobacteriaceae:Serratia                                                                               | 0.667      |
| Otu075 | 0               | 0    | 0   |     | 61 uncultured planctomycete; F155cmL206; JN002808                         | Planctomycetes:Planctomycetia:Planctomycetiales:environmental samples:unclassified_environmental samples                                                       | 0.753      |
| Otu076 | 2               | 1    | 4   |     | 4 uncultured alpha proteobacterium; I-DW-126; GQ453070                    | Proteobacteria:Alphaproteobacteria:environmental samples:unclassified_environmental samples                                                                    | 0.399      |
| Otu077 | 0               | 0    | 0   |     | 41 uncultured Verrucomicrobia bacterium; 39; HQ184346                     | Chlamydiae/Verrucomicrobia group:Verrucomicrobia:environmental samples:unclassified_environmental samples                                                      | 0.781      |
| Otu078 | 0               | 0    | 0   |     | 23 uncultured Pedobacter sp.; Z2_15; EU560970                             | Bacteroidetes/Chlorobi group:Bacteroidetes:Sphingobacteriales:Sphingobacteriaceae:Pedobacter                                                                   | 0.955      |
| Otu079 | 0               | 0    | 2   |     | 1 uncultured Firmicutes bacterium; CF2-169; GU958760                      | Firmicutes:environmental samples:unclassified_environmental samples                                                                                            | 0.519      |
| Otu080 | 0               | 0    | 4   |     | 0 uncultured bacterium; DNA-R3-A2; JN885829                               | environmental samples:unclassified_environmental samples                                                                                                       | 0.615      |
| Otu081 | 0               | 1    | 136 |     | 53 uncultured bacterium; 8B-28; FJ719233                                  | environmental samples:unclassified_environmental samples                                                                                                       | 0.84       |
| Otu082 | 0               | 0    | 28  |     | 0 uncultured gamma proteobacterium; 61-01-24C002; DQ316804                | Proteobacteria:Gammaproteobacteria: unclassified_environmental samples                                                                                         | 0.612      |
| Otu083 | 0               | 0    | 18  |     | 18 uncultured bacterium; MD15c6_12662; JQ374518                           | environmental samples:unclassified_environmental samples                                                                                                       | 0.949      |
| Otu084 | 0               | 4    | 4   |     | 1 uncultured Candidatus Rhodochlamydia sp.; KF-9; EF445478                | Chlamydiae/Verrucomicrobia group:Chlamydiae:Chlamydia:Chlamydiales:Rhodochlamydiaceae:Candidatus Rhodochlamydia                                                | 0.387      |
| Otu085 | 1               | 2    | 0   |     | 2 Rickettsia sp. 60a; EU430262                                            | Proteobacteria:Alphaproteobacteria:Rickettsiales:Rickettsiaceae:Rickettsieae:Rickettsia                                                                        | 0.394      |
| Otu086 | 0               | 0    | 17  |     | 0 uncultured gamma proteobacterium; 357; AB252880                         | Proteobacteria:Gammaproteobacteria: unclassified_environmental samples                                                                                         | 0.462      |
| Otu087 | 0               | 0    | 29  |     | 10 uncultured Bradyrhizobiales bacterium; Nbac4o25; AY876615              | Proteobacteria:Alphaproteobacteria:Rhizobiales:Bradyrhizobiales:environmental samples:unclassified_environmental samples                                       | 1          |
| Otu088 | 3               | 0    | 1   |     | 4 uncultured bacterium; MW_62; HQ910898                                   | environmental samples:unclassified_environmental samples                                                                                                       | 0.449      |
| Otu089 | 0               | 1    | 0   |     | 0 uncultured Candidatus Rhodochlamydia sp.; KF-9; EF445478                | Chlamydiae/Verrucomicrobia group:Chlamydiae:Chlamydia:Chlamydiales:Rhodochlamydiaceae:Candidatus Rhodochlamydia                                                | 0.442      |
| Otu090 | 0               | 2    | 2   |     | 3 uncultured Candidatus Rhodochlamydia sp.; KF-9; EF445478                | Chlamydiae/Verrucomicrobia group:Chlamydiae:Chlamydia:Chlamydiales:Rhodochlamydiaceae:Candidatus Rhodochlamydia                                                | 0.346      |
| Otu091 | 1               | 1    | 1   |     | 5 uncultured Clostridiales bacterium; E205B07; HM080425                   | Firmicutes:Clostridia:Clostridiales:environmental samples:unclassified_environmental samples                                                                   | 0.824      |
| Otu092 | 0               | 0    | 35  |     | 2 uncultured bacterium; N3_F3; FN678758                                   | environmental samples:unclassified_environmental samples                                                                                                       | 0.647      |
| Otu093 | 0               | 0    | 1   |     | 0 uncultured bacterium; HW-C15; AB376586                                  | environmental samples:unclassified_environmental samples                                                                                                       | 0.869      |
| Otu094 | 1               | 1    | 6   |     | 1 uncultured Candidatus Rhodochlamydia sp.; KF-9; EF445478                | Chlamydiae/Verrucomicrobia group:Chlamydiae:Chlamydia:Chlamydiales:Rhodochlamydiaceae:Candidatus Rhodochlamydia                                                | 0.377      |
| Otu095 | 0               | 0    | 22  |     | 1 uncultured bacterium; 65N_G8; FN823912                                  | environmental samples:unclassified_environmental samples                                                                                                       | 0.609      |
| Otu096 | 0               | 0    | 0   |     | 12 bacterium C17; DQ329335                                                | unclassified Bacteria:unclassified Bacteria (miscellaneous):unclassified_unclassified Bacteria (miscellaneous)                                                 | 0.909      |
| Otu097 | 1               | 0    | 0   |     | 0 uncultured bacterium; unfedNYPH62; HM010906                             | environmental samples:unclassified_environmental samples                                                                                                       | 0.647      |
| Otu098 | 0               | 0    | 2   |     | 0 uncultured bacterium; BR18-77; AB589871                                 | environmental samples:unclassified_environmental samples                                                                                                       | 0.532      |
| Otu099 | 2               | 0    | 18  |     | 0 uncultured bacterium; CIL11; FN567051                                   | environmental samples:unclassified_environmental samples                                                                                                       | 0.314      |
| Otu100 | 1               | 2    | 1   |     | 6 uncultured Candidatus Rhodochlamydia sp.; KF-9; EF445478                | Chlamydiae/Verrucomicrobia group:Chlamydiae:Chlamydia:Chlamydiales:Rhodochlamydiaceae:Candidatus Rhodochlamydia                                                | 0.429      |
| Otu101 | 0               | 0    | 0   |     | 15 Arcobacter butzleri; Pig 61; U34386                                    | Proteobacteria:delta/epsilon subdivisions: Epsilonproteobacteria:Campylobacterales:Campylobacteraceae:Arcobacter                                               | 1          |
| Otu102 | 0               | 1    | 4   |     | 0 uncultured bacterium; N3_F3; FN678758                                   | environmental samples:unclassified_environmental samples                                                                                                       | 0.618      |
| Otu103 | 0               | 0    | 5   |     | 1 uncultured bacterium; ME-21; AB288687                                   | environmental samples:unclassified_environmental samples                                                                                                       | 0.429      |
| Otu104 | 5               | 6    | 5   |     | 11 uncultured Candidatus Rhodochlamydia sp.; KF-9; EF445478               | Chlamydiae/Verrucomicrobia group:Chlamydiae:Chlamydia:Chlamydiales:Rhodochlamydiaceae:Candidatus Rhodochlamydia                                                | 0.465      |
| Otu105 | 0               | 0    | 0   |     | 41 uncultured bacterium; mMBR.6.21; JQ624229                              | environmental samples:unclassified_environmental samples                                                                                                       | 0.747      |
| Otu106 | 0               | 0    | 21  |     | 0 uncultured bacterium; 4P_002a_D03; JX672492                             | environmental samples:unclassified_environmental samples                                                                                                       | 0.581      |
| Otu107 | 3               | 9    | 13  |     | 9 uncultured bacterium; Aero2_D03; FJ747041                               | environmental samples:unclassified_environmental samples                                                                                                       | 0.558      |
| Otu108 | 6               | 0    | 18  |     | 0 Rickettsia endosymbiont of Dermacentor andersoni; 01-147.R16s; AY375425 | Proteobacteria:Alphaproteobacteria:Rickettsiales:Rickettsiaceae:Rickettsieae:Rickettsia                                                                        | 0.268      |
| Otu109 | 0               | 0    | 0   |     | 6 uncultured Bacteroidetes bacterium; B3-9; JN371406                      | Bacteroidetes/Chlorobi group:Bacteroidetes:environmental samples:unclassified_environmental samples                                                            | 0.673      |
| Otu110 | 0               | 0    | 3   |     | 0 Kocuria rhizophila; YI-7-KO-1; AB353333                                 | Actinobacteria:Actinobacteria:Actinobacteriales:Actinomycetales:Micrococccineae:Kocuria                                                                        | 1          |
| Otu111 | 0               | 0    | 0   |     | 1 uncultured bacterium; M80; EU215256                                     | environmental samples:unclassified_environmental samples                                                                                                       | 0.987      |
| Otu112 | 2               | 1    | 19  |     | 21 uncultured gamma proteobacterium; TH1-3; AM690808                      | Proteobacteria:Gammaproteobacteria:environmental samples:unclassified_environmental samples                                                                    | 0.455      |
| Otu113 | 0               | 0    | 0   |     | 2 uncultured Candidatus Rhodochlamydia sp.; KF-9; EF445478                | Chlamydiae/Verrucomicrobia group:Chlamydiae:Chlamydia:Chlamydiales:Rhodochlamydiaceae:Candidatus Rhodochlamydia                                                | 0.568      |
| Otu114 | 1               | 0    | 1   |     | 0 uncultured bacterium; ABRB42; HQ224830                                  | environmental samples:unclassified_environmental samples                                                                                                       | 0.718      |
| Otu115 | 0               | 2    | 2   |     | 1 proteobacterium enrichment culture clone CTBE CDB1009F08; JN817882      | Proteobacteria:environmental samples:unclassified_environmental samples                                                                                        | 0.321      |
| Otu116 | 3               | 5    | 2   |     | 2 uncultured bacterium; Stegobium_mycetome_symbiont; JQ805029             | environmental samples:unclassified_environmental samples                                                                                                       | 0.584      |
| Otu117 | 0               | 2    | 3   |     | 0 Rickettsia endosymbiont of Asobara tabida; At-R; FJ603467               | Proteobacteria:Alphaproteobacteria:Rickettsiales:Rickettsiaceae:Rickettsieae:Rickettsia                                                                        | 0.487      |
| Otu118 | 2               | 0    | 4   |     | 1 uncultured bacterium; 34MIC055; JF341300                                | environmental samples:unclassified_environmental samples                                                                                                       | 0.535      |
| Otu119 | 0               | 0    | 3   |     | 1 endosymbiont of Brevipalpus obovatus; AY279401                          | Bacteroidetes/Chlorobi group:Bacteroidetes:unclassified Bacteroidetes (miscellaneous):unclassified_unclassified Bacteroidetes (miscellaneous)                  | 0.425      |
| Otu120 | 0               | 0    | 1   |     | 0 Acinetobacter sp. Cantas3; JN609532                                     | Proteobacteria:Gammaproteobacteria:Pseudomonadales:Moraxellaceae:Acinetobacter                                                                                 | 0.371      |
| Otu121 | 0               | 0    | 2   |     | 3 uncultured bacterium; 27RHU38; AJ863317                                 | environmental samples:unclassified_environmental samples                                                                                                       | 0.556      |
| Otu122 | 0               | 0    | 0   |     | 1 uncultured Firmicutes bacterium; L2d22UD; HM105337                      | Firmicutes:environmental samples:unclassified_environmental samples                                                                                            | 0.513      |
| Otu123 | 0               | 0    | 1   |     | 0 bacterium UASW0125; DQ190338                                            | unclassified Bacteria:unclassified Bacteria (miscellaneous):unclassified_unclassified Bacteria (miscellaneous)                                                 | 0.647      |
| Otu124 | 0               | 0    | 35  |     | 0 uncultured Acinetobacter sp.; GI6-2-A08; F1193040                       | Proteobacteria:Gammaproteobacteria:Pseudomonadales:Moraxellaceae:Acinetobacter                                                                                 | 0.654      |
| Otu125 | 4               | 6    | 2   |     | 9 uncultured Candidatus Rhodochlamydia sp.; KF-9; EF445478                | Chlamydiae/Verrucomicrobia group:Chlamydiae:Chlamydia:Chlamydiales:Rhodochlamydiaceae:Candidatus Rhodochlamydia                                                | 0.548      |
| Otu126 | 0               | 0    | 2   |     | 0 human oral bacterium C70; AF202003                                      | unclassified Bacteria:unclassified Bacteria (miscellaneous):unclassified_unclassified Bacteria (miscellaneous)                                                 | 1          |
| Otu127 | 2               | 2    | 11  |     | 1 uncultured bacterium; Napoli-4B-25; BC07-4B-25; AY592763                | environmental samples:unclassified_environmental samples                                                                                                       | 1          |
| Otu128 | 0               | 0    | 0   |     | 1 actinobacterium X19; EF634298                                           | Actinobacteria:Actinobacteria:unclassified Actinobacteria:unclassified Actinobacteria (miscellaneous):unclassified_unclassified Actinobacteria (miscellaneous) | 0.834      |
| Otu129 | 0               | 0    | 2   |     | 1 uncultured bacterium; TG_BDO.2_WB003; HM483721                          | environmental samples:unclassified_environmental samples                                                                                                       | 0.627      |
| Otu130 | 0               | 0    | 3   |     | 0 uncultured Acinetobacter sp.; 155; EU723430                             | Proteobacteria:Gammaproteobacteria:Pseudomonadales:Moraxellaceae:Acinetobacter                                                                                 | 0.641      |
| Otu131 | 1               | 0    | 1   |     | 0 uncultured alpha proteobacterium; I-DW-126; GQ453070                    | Proteobacteria:Alphaproteobacteria:environmental samples:unclassified_environmental samples                                                                    | 0.622      |
| Otu132 | 0               | 1    | 2   |     | 0 uncultured gamma proteobacterium; TH1-3; AM690808                       | Proteobacteria:Gammaproteobacteria:environmental samples:unclassified_environmental samples                                                                    | 0.675      |
| Otu133 | 0               | 1    | 2   |     | 1 uncultured Candidatus Rhodochlamydia sp.; KF-9; EF445478                | Chlamydiae/Verrucomicrobia group:Chlamydiae:Chlamydia:Chlamydiales:Rhodochlamydiaceae:Candidatus Rhodochlamydia                                                | 0.667      |
| Otu134 | 1               | 2    | 0   |     | 2 uncultured Candidatus Rhodochlamydia sp.; KF-9; EF445478                | Chlamydiae/Verrucomicrobia group:Chlamydiae:Chlamydia:Chlamydiales:Rhodochlamydiaceae:Candidatus Rhodochlamydia                                                | 0.448      |
| Otu135 | 0               | 0    | 3   |     | 0 Acinetobacter sp. Cantas4; JN609533                                     | Proteobacteria:Gammaproteobacteria:Pseudomonadales:Moraxellaceae:Acinetobacter                                                                                 | 0.59       |
| Otu136 | 0               | 0    | 0   |     | 2 uncultured planctomycete; Upland_8_781; JF981504                        | Planctomycetes:Planctomycetia:Planctomycetales:environmental samples:unclassified_environmental samples                                                        | 0.682      |

| OTU    | Number of reads |      |     |     | Taxonomy (NCBI nomenclature)                                     | RDP classification                                                                                                                                                       | S_ab score |
|--------|-----------------|------|-----|-----|------------------------------------------------------------------|--------------------------------------------------------------------------------------------------------------------------------------------------------------------------|------------|
|        | Wol-            | Wol+ | DAM | WAL |                                                                  |                                                                                                                                                                          |            |
| Otu137 | 0               | 0    | 33  |     | 0 Acinetobacter sp. IR-811; GU586302                             | Proteobacteria:Gammaproteobacteria:Pseudomonadales:Moraxellaceae:Acinetobacter                                                                                           | 0.66       |
| Otu138 | 0               | 0    | 34  |     | 0 bacterium UASWS0069; DQ190282                                  | unclassified Bacteria:unclassified Bacteria (miscellaneous):unclassified_unclassified Bacteria (miscellaneous)                                                           | 0.647      |
| Otu139 | 0               | 0    | 1   |     | 1 Rickettsia endosymbiont of Asobara tabida; At-R; FJ603467      | Proteobacteria:Alphaproteobacteria:Rickettsiales:Rickettsiaceae:Rickettsiae:Rickettsia                                                                                   | 0.59       |
| Otu140 | 0               | 0    | 5   |     | 0 uncultured bacterium; TLRainConAD02; EU136742                  | environmental samples:unclassified_environmental samples                                                                                                                 | 0.808      |
| Otu141 | 14              | 33   | 0   |     | 21 uncultured Candidatus Rhodochlamydia sp.; KF-9; EF445478      | Chlamydiae/Verrucomicrobia group:Chlamydiae:Chlamydia:Chlamydiales:Rhodochlamydiae:Candidatus Rhodochlamydia                                                             | 0.445      |
| Otu142 | 0               | 1    | 0   |     | 3 uncultured bacterium; MW_62; HQ910898                          | environmental samples:unclassified_environmental samples                                                                                                                 | 0.487      |
| Otu143 | 2               | 1    | 0   |     | 2 uncultured Candidatus Rhodochlamydia sp.; KF-9; EF445478       | Chlamydiae/Verrucomicrobia group:Chlamydiae:Chlamydia:Chlamydiales:Rhodochlamydiae:Candidatus Rhodochlamydia                                                             | 0.564      |
| Otu144 | 1               | 1    | 0   |     | 0 uncultured Candidatus Rhodochlamydia sp.; KF-9; EF445478       | Chlamydiae/Verrucomicrobia group:Chlamydiae:Chlamydia:Chlamydiales:Rhodochlamydiae:Candidatus Rhodochlamydia                                                             | 0.494      |
| Otu145 | 0               | 0    | 1   |     | 0 uncultured bacterium; 0702007L01DMCFF1910; GU369407            | environmental samples:unclassified_environmental samples                                                                                                                 | 0.551      |
| Otu146 | 0               | 0    | 0   |     | 1 uncultured Candidatus Rhodochlamydia sp.; KF-9; EF445478       | Chlamydiae/Verrucomicrobia group:Chlamydiae:Chlamydia:Chlamydiales:Rhodochlamydiae:Candidatus Rhodochlamydia                                                             | 0.378      |
| Otu147 | 4               | 0    | 6   |     | 4 Rickettsia endosymbiont of Asobara tabida; At-R; FJ603467      | Proteobacteria:Alphaproteobacteria:Rickettsiales:Rickettsiaceae:Rickettsiae:Rickettsia                                                                                   | 0.532      |
| Otu148 | 3               | 0    | 2   |     | 2 Rickettsia endosymbiont of Asobara tabida; At-R; FJ603467      | Proteobacteria:Alphaproteobacteria:Rickettsiales:Rickettsiaceae:Rickettsiae:Rickettsia                                                                                   | 0.558      |
| Otu149 | 0               | 0    | 4   |     | 0 Rickettsia endosymbiont of Asobara tabida; At-R; FJ603467      | Proteobacteria:Alphaproteobacteria:Rickettsiales:Rickettsiaceae:Rickettsiae:Rickettsia                                                                                   | 0.503      |
| Otu150 | 0               | 0    | 1   |     | 0 uncultured bacterium; Stegobium_mycetome_symbiont; JQ805029    | environmental samples:unclassified_environmental samples                                                                                                                 | 0.6        |
| Otu151 | 4               | 0    | 6   |     | 6 Rickettsia endosymbiont of Asobara tabida; At-R; FJ603467      | Proteobacteria:Alphaproteobacteria:Rickettsiales:Rickettsiaceae:Rickettsiae:Rickettsia                                                                                   | 0.595      |
| Otu152 | 3               | 6    | 0   |     | 2 uncultured Candidatus Rhodochlamydia sp.; KF-9; EF445478       | Chlamydiae/Verrucomicrobia group:Chlamydiae:Chlamydia:Chlamydiales:Rhodochlamydiae:Candidatus Rhodochlamydia                                                             | 0.695      |
| Otu153 | 0               | 1    | 0   |     | 0 Rickettsia endosymbiont of Asobara tabida; At-R; FJ603467      | Proteobacteria:Alphaproteobacteria:Rickettsiales:Rickettsiaceae:Rickettsiae:Rickettsia                                                                                   | 0.583      |
| Otu154 | 1               | 5    | 0   |     | 3 uncultured Candidatus Rhodochlamydia sp.; KF-9; EF445478       | Chlamydiae/Verrucomicrobia group:Chlamydiae:Chlamydia:Chlamydiales:Rhodochlamydiae:Candidatus Rhodochlamydia                                                             | 0.519      |
| Otu155 | 0               | 0    | 7   |     | 0 uncultured bacterium; LZT_300; EF551878                        | environmental samples:unclassified_environmental samples                                                                                                                 | 0.705      |
| Otu156 | 0               | 0    | 3   |     | 0 Rickettsia endosymbiont of Asobara tabida; At-R; FJ603467      | Proteobacteria:Alphaproteobacteria:Rickettsiales:Rickettsiaceae:Rickettsiae:Rickettsia                                                                                   | 0.487      |
| Otu157 | 2               | 0    | 0   |     | 0 Rickettsia endosymbiont of Nuclearia pattersoni; AY364636      | Proteobacteria:Alphaproteobacteria:Rickettsiales:Rickettsiaceae:Rickettsiae:Rickettsia                                                                                   | 0.5        |
| Otu158 | 0               | 1    | 1   |     | 1 Rickettsia endosymbiont of Nuclearia pattersoni; AY364636      | Proteobacteria:Alphaproteobacteria:Rickettsiales:Rickettsiaceae:Rickettsiae:Rickettsia                                                                                   | 0.366      |
| Otu159 | 0               | 1    | 0   |     | 0 uncultured Candidatus Rhodochlamydia sp.; KF-9; EF445478       | Chlamydiae/Verrucomicrobia group:Chlamydiae:Chlamydia:Chlamydiales:Rhodochlamydiae:Candidatus Rhodochlamydia                                                             | 0.474      |
| Otu160 | 0               | 1    | 1   |     | 0 uncultured bacterium; D1512W_193; HQ849850                     | environmental samples:unclassified_environmental samples                                                                                                                 | 0.477      |
| Otu161 | 0               | 0    | 6   |     | 1 uncultured Candidatus Rhodochlamydia sp.; KF-9; EF445478       | Chlamydiae/Verrucomicrobia group:Chlamydiae:Chlamydia:Chlamydiales:Rhodochlamydiae:Candidatus Rhodochlamydia                                                             | 0.219      |
| Otu162 | 2               | 3    | 5   |     | 5 uncultured Candidatus Rhodochlamydia sp.; KF-9; EF445478       | Chlamydiae/Verrucomicrobia group:Chlamydiae:Chlamydia:Chlamydiales:Rhodochlamydiae:Candidatus Rhodochlamydia                                                             | 0.292      |
| Otu163 | 0               | 0    | 19  |     | 1 uncultured bacterium; G910P31FN13.T0; EU172165                 | environmental samples:unclassified_environmental samples                                                                                                                 | 0.647      |
| Otu164 | 0               | 0    | 1   |     | 0 Acinetobacter sp. TD IW 08; FM164635                           | Proteobacteria:Gammaproteobacteria:Pseudomonadales:Moraxellaceae:Acinetobacter                                                                                           | 0.635      |
| Otu165 | 0               | 0    | 8   |     | 1 Acinetobacter sp. 2P1H6; HF936991                              | Proteobacteria:Gammaproteobacteria:Pseudomonadales:Moraxellaceae:Acinetobacter                                                                                           | 0.673      |
| Otu166 | 0               | 0    | 3   |     | 53 uncultured bacterium; T8003-01; AB196084                      | environmental samples:unclassified_environmental samples                                                                                                                 | 0.865      |
| Otu167 | 0               | 0    | 0   |     | 1 Rickettsia endosymbiont of Asobara tabida; At-R; FJ603467      | Proteobacteria:Alphaproteobacteria:Rickettsiales:Rickettsiaceae:Rickettsiae:Rickettsia                                                                                   | 0.6        |
| Otu168 | 0               | 0    | 0   |     | 3 uncultured Ochrobactrum sp.; Y6; JF522257                      | Proteobacteria:Alphaproteobacteria:Rhizobiales:Brucellaceae:Ochrobactrum                                                                                                 | 0.994      |
| Otu169 | 0               | 0    | 1   |     | 0 Rickettsia endosymbiont of Asobara tabida; At-R; FJ603467      | Proteobacteria:Alphaproteobacteria:Rickettsiales:Rickettsiaceae:Rickettsiae:Rickettsia                                                                                   | 0.548      |
| Otu170 | 0               | 0    | 1   |     | 3 uncultured bacterium DEEP-3; AF142877                          | Proteobacteria:Betaproteobacteria:Burkholderiales:Comamonadaceae:Delftia                                                                                                 | 0.869      |
| Otu171 | 1               | 0    | 1   |     | 2 uncultured bacterium; Stegobium_mycetome_symbiont; JQ805029    | environmental samples:unclassified_environmental samples                                                                                                                 | 0.561      |
| Otu172 | 0               | 0    | 5   |     | 0 Acinetobacter sp. Cantas3; JN609532                            | Proteobacteria:Gammaproteobacteria:Pseudomonadales:Moraxellaceae:Acinetobacter                                                                                           | 0.487      |
| Otu173 | 0               | 2    | 1   |     | 3 uncultured Candidatus Rhodochlamydia sp.; KF-9; EF445478       | Chlamydiae/Verrucomicrobia group:Chlamydiae:Chlamydia:Chlamydiales:Rhodochlamydiae:Candidatus Rhodochlamydia                                                             | 0.526      |
| Otu174 | 0               | 0    | 0   |     | 15 uncultured bacterium; Car1171c; AF224846                      | environmental samples:unclassified_environmental samples                                                                                                                 | 1          |
| Otu175 | 4               | 0    | 0   |     | 1 Rickettsia endosymbiont of Asobara tabida; At-R; FJ603467      | Proteobacteria:Alphaproteobacteria:Rickettsiales:Rickettsiaceae:Rickettsiae:Rickettsia                                                                                   | 0.571      |
| Otu176 | 2               | 1    | 1   |     | 2 uncultured bacterium; GP27685C03; JN850423                     | environmental samples:unclassified_environmental samples                                                                                                                 | 0.423      |
| Otu177 | 0               | 1    | 7   |     | 0 uncultured gamma proteobacterium; W504A_F10; DQ170984          | Proteobacteria:Gammaproteobacteria:environmental samples:unclassified_environmental samples                                                                              | 0.423      |
| Otu178 | 0               | 0    | 1   |     | 0 Acinetobacter sp. Cantas3; JN609532                            | Proteobacteria:Gammaproteobacteria:Pseudomonadales:Moraxellaceae:Acinetobacter                                                                                           | 0.526      |
| Otu179 | 0               | 1    | 1   |     | 0 uncultured Candidatus Rhodochlamydia sp.; KF-9; EF445478       | Chlamydiae/Verrucomicrobia group:Chlamydiae:Chlamydia:Chlamydiales:Rhodochlamydiae:Candidatus Rhodochlamydia                                                             | 0.425      |
| Otu180 | 0               | 0    | 31  |     | 0 bacterium UASWS0069; DQ190282                                  | unclassified Bacteria:unclassified Bacteria (miscellaneous):unclassified_unclassified Bacteria (miscellaneous)                                                           | 0.647      |
| Otu181 | 0               | 4    | 0   |     | 0 uncultured bacterium; Adhufec025rbh; AY471698                  | environmental samples:unclassified_environmental samples                                                                                                                 | 1          |
| Otu182 | 0               | 0    | 0   |     | 3 uncultured bacterium; NC24d2_18949; JQ370011                   | environmental samples:unclassified_environmental samples                                                                                                                 | 0.814      |
| Otu183 | 0               | 0    | 2   |     | 0 Rickettsia endosymbiont of Nuclearia pattersoni; AY364636      | Proteobacteria:Alphaproteobacteria:Rickettsiales:Rickettsiaceae:Rickettsiae:Rickettsia                                                                                   | 0.589      |
| Otu184 | 1               | 1    | 4   |     | 1 uncultured Candidatus Rhodochlamydia sp.; KF-9; EF445478       | Chlamydiae/Verrucomicrobia group:Chlamydiae:Chlamydia:Chlamydiales:Rhodochlamydiae:Candidatus Rhodochlamydia                                                             | 0.308      |
| Otu185 | 0               | 0    | 0   |     | 3 uncultured bacterium; 137; FJ718853                            | environmental samples:unclassified_environmental samples                                                                                                                 | 0.878      |
| Otu186 | 0               | 0    | 1   |     | 0 uncultured bacterium; 34T1; EF552239                           | environmental samples:unclassified_environmental samples                                                                                                                 | 0.39       |
| Otu187 | 0               | 0    | 5   |     | 3 uncultured Sphingobacteria bacterium; GASP-WB152_H09; EF073373 | Bacteroidetes/Chlorobi group:Bacteroidetes:Sphingobacteria:environmental samples:unclassified_environmental samples                                                      | 0.477      |
| Otu188 | 1               | 0    | 1   |     | 0 Rickettsia endosymbiont of Asobara tabida; At-R; FJ603467      | Proteobacteria:Alphaproteobacteria:Rickettsiales:Rickettsiaceae:Rickettsiae:Rickettsia                                                                                   | 0.609      |
| Otu189 | 0               | 0    | 1   |     | 0 uncultured bacterium; Stegobium_mycetome_symbiont; JQ805029    | environmental samples:unclassified_environmental samples                                                                                                                 | 0.5        |
| Otu190 | 0               | 0    | 4   |     | 0 uncultured bacterium; P38; JQ958723                            | environmental samples:unclassified_environmental samples                                                                                                                 | 0.59       |
| Otu191 | 1               | 0    | 0   |     | 0 uncultured Candidatus Rhodochlamydia sp.; KF-9; EF445478       | Chlamydiae/Verrucomicrobia group:Chlamydiae:Chlamydia:Chlamydiales:Rhodochlamydiae:Candidatus Rhodochlamydia                                                             | 0.462      |
| Otu192 | 0               | 0    | 2   |     | 1 uncultured bacterium; Amsterdam-2B-71; BC20-2B-71; AY592427    | environmental samples:unclassified_environmental samples                                                                                                                 | 0.506      |
| Otu193 | 0               | 0    | 2   |     | 0 endosymbiont of Brevipalpus obovatus; AY279401                 | Bacteroidetes/Chlorobi group:Bacteroidetes:unclassified Bacteroidetes:unclassified Bacteroidetes (miscellaneous):unclassified_unclassified Bacteroidetes (miscellaneous) | 0.516      |
| Otu194 | 0               | 0    | 0   |     | 1 Azotobacter tropicalis; AM9; JN591767                          | Proteobacteria:Gammaproteobacteria:Pseudomonadales:Pseudomonadaceae:Azotobacter group:Azotobacter                                                                        | 0.721      |
| Otu195 | 0               | 0    | 0   |     | 1 Rhizobium sp. RCD1; GU902301                                   | Proteobacteria:Alphaproteobacteria:Rhizobiales:Rhizobiaceae:Rhizobium/Agrobacterium group:Rhizobium                                                                      | 0.827      |
| Otu196 | 0               | 0    | 0   |     | 10 uncultured actinobacterium; lhac1; DQ648926                   | Actinobacteria:Actinobacteria:environmental samples:unclassified_environmental samples                                                                                   | 0.955      |
| Otu197 | 0               | 0    | 0   |     | 4 uncultured bacterium; D21R45C50; FM956835                      | environmental samples:unclassified_environmental samples                                                                                                                 | 0.855      |
| Otu198 | 0               | 0    | 0   |     | 1 bacterium enrichment culture clone MW-8; JX096819              | environmental samples:unclassified_environmental samples                                                                                                                 | 0.429      |
| Otu199 | 0               | 0    | 0   |     | 1 uncultured bacterium; Amsterdam-2B-71; BC20-2B-71; AY592427    | Proteobacteria:Betaproteobacteria:Burkholderiales:Comamonadaceae:Variovorax                                                                                              | 1          |
| Otu200 | 1               | 0    | 0   |     | 0 uncultured bacterium; II-03; GU724742                          | environmental samples:unclassified_environmental samples                                                                                                                 | 0.962      |
| Otu201 | 0               | 1    | 7   |     | 0 uncultured gamma proteobacterium; TH1-3; AM690808              | Proteobacteria:Gammaproteobacteria:environmental samples:unclassified_environmental samples                                                                              | 0.583      |
| Otu202 | 0               | 0    | 4   |     | 1 uncultured bacterium; 0702007L01DMCFF1910; GU369407            | environmental samples:unclassified_environmental samples                                                                                                                 | 0.506      |
| Otu203 | 0               | 0    | 0   |     | 1 uncultured bacterium; AR114; GQ860192                          | environmental samples:unclassified_environmental samples                                                                                                                 | 0.761      |
| Otu204 | 0               | 0    | 4   |     | 1 Rickettsia endosymbiont of Asobara tabida; At-R; FJ603467      | Proteobacteria:Alphaproteobacteria:Rickettsiales:Rickettsiaceae:Rickettsiae:Rickettsia                                                                                   | 0.302      |

| OTU    | Number of reads |      |     |     | Taxonomy (NCBI nomenclature)                                  | RDP classification                                                                                                            | S_ab score |
|--------|-----------------|------|-----|-----|---------------------------------------------------------------|-------------------------------------------------------------------------------------------------------------------------------|------------|
|        | Wol-            | Wol+ | DAM | WAL |                                                               |                                                                                                                               |            |
| Otu205 | 1               | 0    | 0   | 0   | uncultured Candidatus Rhabdochlamydia sp.; KF-9; EF445478     | Chlamydiae/Verrucomicrobia group:Chlamydiae:Chlamydia:Chlamydiales:Rhabdochlamydiae:Candidatus Rhabdochlamydia                | 0.484      |
| Otu206 | 0               | 0    | 0   | 0   | 1 uncultured proteobacterium; Upland_16_1262; JF981981        | Proteobacteria:environmental samples:unclassified_environmental samples                                                       | 1          |
| Otu207 | 0               | 0    | 1   | 1   | 1 uncultured Candidatus Cardinium sp.; EU333930               | Bacteroidetes/Chlorobi group:Bacteroidetes:unclassified Bacteroidetes:Candidatus Cardinium                                    | 0.431      |
| Otu208 | 0               | 0    | 0   | 0   | 1 uncultured bacterium; 1494; JN855126                        | environmental samples:unclassified_environmental samples                                                                      | 0.948      |
| Otu209 | 0               | 0    | 1   | 1   | 1 uncultured bacterium; MW_62; HQ910898                       | environmental samples:unclassified_environmental samples                                                                      | 0.525      |
| Otu210 | 0               | 0    | 2   | 0   | 0 uncultured bacterium; Cl11; FN567051                        | environmental samples:unclassified_environmental samples                                                                      | 0.287      |
| Otu211 | 0               | 0    | 7   | 0   | 0 uncultured bacterium; F51; EU034457                         | environmental samples:unclassified_environmental samples                                                                      | 0.718      |
| Otu212 | 0               | 0    | 7   | 0   | 0 Acinetobacter sp. 2P1H6; HF936991                           | Proteobacteria:Gammaproteobacteria:Pseudomonadales:Moraxellaceae:Acinetobacter                                                | 0.686      |
| Otu213 | 0               | 1    | 1   | 0   | 0 uncultured bacterium; HFV02_110; GU103752                   | environmental samples:unclassified_environmental samples                                                                      | 0.5        |
| Otu214 | 0               | 0    | 1   | 0   | 0 uncultured bacterium; 088; EU499490                         | environmental samples:unclassified_environmental samples                                                                      | 0.645      |
| Otu215 | 0               | 0    | 3   | 1   | 1 uncultured bacterium; BR18-77; AB589871                     | environmental samples:unclassified_environmental samples                                                                      | 0.571      |
| Otu216 | 1               | 1    | 1   | 2   | 2 uncultured Candidatus Rhabdochlamydia sp.; KF-9; EF445478   | Chlamydiae/Verrucomicrobia group:Chlamydiae:Chlamydia:Chlamydiales:Rhabdochlamydiae:Candidatus Rhabdochlamydia                | 0.423      |
| Otu217 | 0               | 1    | 1   | 0   | 0 Candidatus Rickettsia hoogstraalii; Croatia; FJ767735       | Proteobacteria:Alphaproteobacteria:Rickettsiales:Rickettsiaceae:Rickettsiae:Rickettsia                                        | 0.253      |
| Otu218 | 0               | 0    | 1   | 0   | 0 Rickettsia endosymbiont of Nuclearia pattersoni; AY364636   | Proteobacteria:Alphaproteobacteria:Rickettsiales:Rickettsiaceae:Rickettsiae:Rickettsia                                        | 0.384      |
| Otu219 | 0               | 0    | 0   | 2   | 2 uncultured bacterium; CadhumucNU2bF05; DQ339856             | environmental samples:unclassified_environmental samples                                                                      | 0.227      |
| Otu220 | 0               | 0    | 0   | 6   | 6 Sphingobacteriales bacterium TP373; EF636200                | Bacteroidetes/Chlorobi group:Bacteroidetes:Sphingobacteria:Sphingobacteriales:unclassified Sphingobacteriales (miscellaneous) | 0.954      |
| Otu221 | 0               | 0    | 2   | 1   | 1 uncultured bacterium; Stegobium_mycetome_symbiont; JQ805029 | environmental samples:unclassified_environmental samples                                                                      | 0.31       |
| Otu222 | 0               | 1    | 1   | 0   | 0 uncultured Candidatus Rhabdochlamydia sp.; KF-9; EF445478   | Chlamydiae/Verrucomicrobia group:Chlamydiae:Chlamydia:Chlamydiales:Rhabdochlamydiae:Candidatus Rhabdochlamydia                | 0.397      |
| Otu223 | 0               | 0    | 0   | 1   | 1 uncultured bacterium; McL21; FN567884                       | environmental samples:unclassified_environmental samples                                                                      | 0.641      |
| Otu224 | 0               | 0    | 5   | 1   | 1 Acinetobacter johnsonii; F27; EF204267                      | Proteobacteria:Gammaproteobacteria:Pseudomonadales:Moraxellaceae:Acinetobacter                                                | 0.647      |
| Otu225 | 0               | 0    | 0   | 1   | 1 uncultured bacterium; XSHAS; AY601720                       | environmental samples:unclassified_environmental samples                                                                      | 0.955      |
| Otu226 | 0               | 0    | 3   | 0   | 0 uncultured bacterium; DL071; AB241178                       | environmental samples:unclassified_environmental samples                                                                      | 0.967      |
| Otu227 | 0               | 0    | 1   | 4   | 4 Micrococcus sp. V4.MO.30; V4.MO.30 = MM_2718; AJ244663      | Actinobacteria:Actinobacteria:Actinobacteridae:Actinomycetales:Micrococineae:Micrococcus                                      | 1          |
| Otu228 | 0               | 0    | 0   | 2   | 2 uncultured bacterium; clone group A1ghqj; X91424            | environmental samples:unclassified_environmental samples                                                                      | 1          |
| Otu229 | 0               | 0    | 6   | 1   | 1 uncultured bacterium; areia_46; GQ996478                    | environmental samples:unclassified_environmental samples                                                                      | 0.686      |
| Otu230 | 0               | 0    | 0   | 1   | 1 uncultured Candidatus Rhabdochlamydia sp.; KF-9; EF445478   | Chlamydiae/Verrucomicrobia group:Chlamydiae:Chlamydia:Chlamydiales:Rhabdochlamydiae:Candidatus Rhabdochlamydia                | 0.396      |
| Otu231 | 0               | 0    | 1   | 0   | 0 uncultured bacterium; NL49_4; GU816187                      | environmental samples:unclassified_environmental samples                                                                      | 0.917      |
| Otu232 | 2               | 0    | 0   | 0   | 0 uncultured bacterium; CHPA.0912.78; HQ904470                | environmental samples:unclassified_environmental samples                                                                      | 0.5        |
| Otu233 | 0               | 0    | 2   | 0   | 0 uncultured bacterium; B16_B71; GQ458103                     | environmental samples:unclassified_environmental samples                                                                      | 0.439      |
| Otu234 | 0               | 0    | 3   | 0   | 0 Acinetobacter radioresistens; S523; JX032809                | Proteobacteria:Gammaproteobacteria:Pseudomonadales:Moraxellaceae:Acinetobacter                                                | 0.545      |
| Otu235 | 0               | 0    | 4   | 0   | 0 uncultured bacterium; Amsterdam-2B-71; BC20-2B-71; AY592427 | environmental samples:unclassified_environmental samples                                                                      | 0.59       |
| Otu236 | 0               | 0    | 2   | 2   | 2 Leucobacter sp. N8; EF590233                                | Actinobacteria:Actinobacteria:Actinobacteridae:Actinomycetales:Micrococineae:Leucobacter                                      | 0.974      |
| Otu237 | 0               | 0    | 0   | 2   | 2 uncultured bacterium; MW_62; HQ910898                       | environmental samples:unclassified_environmental samples                                                                      | 0.429      |
| Otu238 | 0               | 0    | 0   | 2   | 2 uncultured Verrucomicrobia bacterium; 100M1_H4; DQ514041    | Chlamydiae/Verrucomicrobia group:Verrucomicrobia:environmental samples:unclassified_environmental samples                     | 0.755      |
| Otu239 | 1               | 0    | 0   | 3   | 3 uncultured bacterium; BFF09_A9A; JQ046457                   | environmental samples:unclassified_environmental samples                                                                      | 0.506      |
| Otu240 | 0               | 0    | 5   | 0   | 0 uncultured gamma proteobacterium; 24HbSt13_AAB; EF534517    | Proteobacteria:Gammaproteobacteria:environmental samples:unclassified_environmental samples                                   | 0.59       |
| Otu241 | 0               | 0    | 0   | 1   | 1 uncultured bacterium; FWC12_MS; JQ480743                    | environmental samples:unclassified_environmental samples                                                                      | 0.865      |
| Otu242 | 1               | 0    | 0   | 0   | 0 uncultured bacterium; s41; AY171306                         | environmental samples:unclassified_environmental samples                                                                      | 1          |
| Otu243 | 0               | 0    | 1   | 0   | 0 Acinetobacter sp. TDW13; B05; GU003823                      | Proteobacteria:Gammaproteobacteria:Pseudomonadales:Moraxellaceae:Acinetobacter                                                | 0.622      |
| Otu244 | 0               | 0    | 2   | 1   | 1 Rickettsia sp. 60a; EU430262                                | Proteobacteria:Alphaproteobacteria:Rickettsiales:Rickettsiaceae:Rickettsiae:Rickettsia                                        | 0.333      |
| Otu245 | 1               | 0    | 0   | 0   | 0 uncultured Candidatus Rhabdochlamydia sp.; KF-9; EF445478   | Chlamydiae/Verrucomicrobia group:Chlamydiae:Chlamydia:Chlamydiales:Rhabdochlamydiae:Candidatus Rhabdochlamydia                | 0.477      |
| Otu246 | 0               | 1    | 7   | 2   | 2 uncultured bacterium; MW_62; HQ910898                       | environmental samples:unclassified_environmental samples                                                                      | 0.397      |
| Otu247 | 0               | 0    | 4   | 0   | 0 Acinetobacter sp. TDW13; B05; GU003823                      | Proteobacteria:Gammaproteobacteria:Pseudomonadales:Moraxellaceae:Acinetobacter                                                | 0.545      |
| Otu248 | 0               | 0    | 0   | 1   | 1 Rickettsia endosymbiont of Nuclearia pattersoni; AY364636   | Proteobacteria:Alphaproteobacteria:Rickettsiales:Rickettsiaceae:Rickettsiae:Rickettsia                                        | 0.564      |
| Otu249 | 0               | 0    | 0   | 1   | 1 uncultured Candidatus Rhabdochlamydia sp.; KF-9; EF445478   | Chlamydiae/Verrucomicrobia group:Chlamydiae:Chlamydia:Chlamydiales:Rhabdochlamydiae:Candidatus Rhabdochlamydia                | 0.416      |
| Otu250 | 1               | 0    | 2   | 0   | 0 uncultured Candidatus Rhabdochlamydia sp.; KF-9; EF445478   | Chlamydiae/Verrucomicrobia group:Chlamydiae:Chlamydia:Chlamydiales:Rhabdochlamydiae:Candidatus Rhabdochlamydia                | 0.374      |
| Otu251 | 1               | 0    | 1   | 0   | 0 uncultured bacterium; Stegobium_mycetome_symbiont; JQ805029 | environmental samples:unclassified_environmental samples                                                                      | 0.571      |
| Otu252 | 0               | 0    | 2   | 0   | 0 Rickettsia endosymbiont of Nuclearia pattersoni; AY364636   | Proteobacteria:Alphaproteobacteria:Rickettsiales:Rickettsiaceae:Rickettsiae:Rickettsia                                        | 0.346      |
| Otu253 | 0               | 0    | 5   | 1   | 1 uncultured bacterium; Bul2ac05; FJ228814                    | environmental samples:unclassified_environmental samples                                                                      | 0.503      |
| Otu254 | 0               | 0    | 1   | 0   | 0 Acinetobacter junii; DQ224385                               | Proteobacteria:Gammaproteobacteria:Pseudomonadales:Moraxellaceae:Acinetobacter                                                | 0.436      |
| Otu255 | 0               | 0    | 1   | 16  | 16 uncultured Bacteroidetes bacterium; SSG2SE06; JN567968     | Bacteroidetes/Chlorobi group:Bacteroidetes:environmental samples:unclassified_environmental samples                           | 0.844      |
| Otu256 | 0               | 0    | 0   | 2   | 2 uncultured prokaryote; BSLc63; EF682366                     | prokaryotic environmental samples:unclassified_prokaryotic environmental samples                                              | 1          |
| Otu257 | 0               | 0    | 2   | 8   | 8 Flavobacterium sp. H1; EF590224                             | Bacteroidetes/Chlorobi group:Bacteroidetes:Flavobacterii:Flavobacteriales:Flavobacteriaceae:Flavobacterium                    | 1          |
| Otu258 | 0               | 0    | 1   | 0   | 0 Propionibacterium acnes; AF076032                           | Actinobacteria:Actinobacteria:Actinobacteridae:Actinomycetales:Propionibacterineae:Propionibacterium                          | 0.955      |
| Otu259 | 0               | 0    | 0   | 1   | 1 Rickettsia endosymbiont of Asobara tabida; At-R; FJ603467   | Proteobacteria:Alphaproteobacteria:Rickettsiales:Rickettsiaceae:Rickettsiae:Rickettsia                                        | 0.374      |
| Otu260 | 0               | 1    | 1   | 1   | 1 Wolbachia pipientis; HQ121414                               | Proteobacteria:Alphaproteobacteria:Rickettsiales:Anaplasmataceae:Wolbachiae:Wolbachia                                         | 0.309      |
| Otu261 | 1               | 2    | 1   | 0   | 0 uncultured Candidatus Rhabdochlamydia sp.; KF-9; EF445478   | Chlamydiae/Verrucomicrobia group:Chlamydiae:Chlamydia:Chlamydiales:Rhabdochlamydiae:Candidatus Rhabdochlamydia                | 0.556      |
| Otu262 | 0               | 0    | 1   | 0   | 0 uncultured bacterium; SHZA469; GQ154753                     | environmental samples:unclassified_environmental samples                                                                      | 0.426      |
| Otu263 | 0               | 0    | 1   | 1   | 1 Rickettsia endosymbiont of Nuclearia pattersoni; AY364636   | Proteobacteria:Alphaproteobacteria:Rickettsiales:Rickettsiaceae:Rickettsiae:Rickettsia                                        | 0.283      |
| Otu264 | 1               | 0    | 0   | 0   | 0 Acinetobacter baumannii; QQB; GU300764                      | Proteobacteria:Gammaproteobacteria:Pseudomonadales:Moraxellaceae:Acinetobacter                                                | 0.27       |
| Otu265 | 0               | 1    | 5   | 3   | 3 uncultured bacterium; GP27685cO3; JN850423                  | environmental samples:unclassified_environmental samples                                                                      | 0.37       |
| Otu266 | 0               | 0    | 1   | 0   | 0 Acinetobacter sp. Cantas3; JN609532                         | Proteobacteria:Gammaproteobacteria:Pseudomonadales:Moraxellaceae:Acinetobacter                                                | 0.643      |
| Otu267 | 0               | 0    | 0   | 7   | 7 uncultured bacterium; Upland_120_7942; JF988642             | environmental samples:unclassified_environmental samples                                                                      | 0.942      |
| Otu268 | 1               | 0    | 0   | 2   | 2 uncultured epsilon proteobacterium; LK2.127-7; AY208812     | Proteobacteria:delta/epsilon subdivisions:Epsilonproteobacteria:environmental samples:unclassified_environmental samples      | 1          |
| Otu269 | 0               | 0    | 2   | 0   | 0 uncultured bacterium; SB-d0-2; JQ664572                     | environmental samples:unclassified_environmental samples                                                                      | 0.607      |
| Otu270 | 3               | 1    | 4   | 6   | 6 uncultured prokaryote; DGGE band GW1a3-5(S); AY501817       | prokaryotic environmental samples:unclassified_prokaryotic environmental samples                                              | 1          |
| Otu271 | 0               | 2    | 0   | 0   | 0 uncultured Candidatus Rhabdochlamydia sp.; KF-9; EF445478   | Chlamydiae/Verrucomicrobia group:Chlamydiae:Chlamydia:Chlamydiales:Rhabdochlamydiae:Candidatus Rhabdochlamydia                | 0.439      |
| Otu272 | 0               | 0    | 1   | 0   | 0 uncultured bacterium; BFF09_A5A; JQ046439                   | environmental samples:unclassified_environmental samples                                                                      | 0.575      |

| OTU    | Number of reads |      |     |     | Taxonomy (NCBI nomenclature)                                | RDP classification                                                                                                                                                                 | S_ab score |
|--------|-----------------|------|-----|-----|-------------------------------------------------------------|------------------------------------------------------------------------------------------------------------------------------------------------------------------------------------|------------|
|        | Wol-            | Wol+ | DAM | WAL |                                                             |                                                                                                                                                                                    |            |
| Otu273 | 0               | 5    | 0   | 0   | uncultured bacterium O85A; AF018039                         | environmental samples:unclassified_environmental samples                                                                                                                           | 1          |
| Otu274 | 0               | 0    | 1   | 0   | uncultured Moraxellaceae bacterium; PA+C_F02; FJ665941      | Proteobacteria:Gammaproteobacteria:Pseudomonadales:Moraxellaceae:environmental samples:unclassified_environmental samples                                                          | 0.532      |
| Otu275 | 0               | 1    | 0   | 0   | uncultured Candidatus Rhabdochlamydia sp.; KF-9; EF445478   | Chlamydiae/Verrucomicrobia group:Chlamydiae:Chlamydia:Chlamydiales:Rhabdochlamydiaceae:Candidatus Rhabdochlamydia                                                                  | 0.477      |
| Otu276 | 0               | 0    | 1   | 0   | uncultured gamma proteobacterium; BC18; EF619936            | Proteobacteria:Gammaproteobacteria:environmental samples:unclassified_environmental samples                                                                                        | 0.507      |
| Otu277 | 0               | 0    | 1   | 0   | uncultured bacterium; WHB47-58; AB426380                    | environmental samples:unclassified_environmental samples                                                                                                                           | 0.474      |
| Otu278 | 0               | 0    | 1   | 1   | Rickettsia endosymbiont of Nuclearia pattersoni; AY364636   | Proteobacteria:Alphaproteobacteria:Rickettsiales:Rickettsiaceae:Rickettsiae:Rickettsia                                                                                             | 0.346      |
| Otu279 | 1               | 0    | 3   | 3   | uncultured bacterium; DGGE gel band D17_7; DQ906130         | environmental samples:unclassified_environmental samples                                                                                                                           | 1          |
| Otu280 | 0               | 0    | 4   | 0   | Acinetobacter sp. st25; FJ544373                            | Proteobacteria:Gammaproteobacteria:Pseudomonadales:Moraxellaceae:Acinetobacter                                                                                                     | 0.639      |
| Otu281 | 0               | 0    | 0   | 1   | Rickettsia endosymbiont of Bemisia tabaci; R12; GU563837    | Proteobacteria:Alphaproteobacteria:Rickettsiales:Rickettsiaceae:Rickettsiae:Rickettsia                                                                                             | 0.481      |
| Otu282 | 0               | 0    | 0   | 1   | uncultured Mesorhizobium sp.; Uvmen1_27; JQ701574           | Proteobacteria:Alphaproteobacteria:Rhizobiales:Phyllobacteriaceae:Mesorhizobium                                                                                                    | 0.955      |
| Otu283 | 0               | 1    | 1   | 0   | uncultured bacterium; 3P-3-2-N22; EU705928                  | environmental samples:unclassified_environmental samples                                                                                                                           | 0.27       |
| Otu284 | 0               | 0    | 0   | 1   | uncultured bacterium; Z4_72; EU560973                       | environmental samples:unclassified_environmental samples                                                                                                                           | 0.955      |
| Otu285 | 0               | 0    | 6   | 0   | uncultured bacterium; P3IU-35; AF414573                     | environmental samples:unclassified_environmental samples                                                                                                                           | 0.968      |
| Otu286 | 0               | 0    | 0   | 2   | uncultured bacterium; Nbs_454_243; JX311011                 | environmental samples:unclassified_environmental samples                                                                                                                           | 0.801      |
| Otu287 | 0               | 0    | 0   | 1   | uncultured Acinetobacter sp.; S552D120; GU356368            | Proteobacteria:Gammaproteobacteria:Pseudomonadales:Moraxellaceae:Acinetobacter                                                                                                     | 0.447      |
| Otu288 | 0               | 0    | 1   | 0   | endosymbiont of Brevipalpus obovatus; AY279401              | Bacteroidetes/Chlorobi group:Bacteroidetes:unclassified Bacteroidetes:unclassified Bacteroidetes (miscellaneous):unclassified_unclassified Bacteroidetes (miscellaneous)           | 0.421      |
| Otu289 | 0               | 0    | 0   | 1   | uncultured bacterium; Lc2z_ML_107; FJ355257                 | environmental samples:unclassified_environmental samples                                                                                                                           | 0.529      |
| Otu290 | 0               | 0    | 0   | 1   | uncultured alpha proteobacterium; RT03-HC-41; AY475202      | Proteobacteria:Alphaproteobacteria:environmental samples:unclassified_environmental samples                                                                                        | 0.622      |
| Otu291 | 1               | 0    | 0   | 0   | uncultured alpha proteobacterium; r-DW-126; GQ453070        | Proteobacteria:Alphaproteobacteria:environmental samples:unclassified_environmental samples                                                                                        | 0.484      |
| Otu292 | 0               | 0    | 1   | 0   | uncultured bacterium; Stegobium_mycetome_symbiont; JQ805029 | environmental samples:unclassified_environmental samples                                                                                                                           | 0.577      |
| Otu293 | 1               | 0    | 1   | 0   | Rickettsia endosymbiont of Asobara tabida; At-R; FJ603467   | Proteobacteria:Alphaproteobacteria:Rickettsiales:Rickettsiaceae:Rickettsiae:Rickettsia                                                                                             | 0.487      |
| Otu294 | 0               | 0    | 1   | 0   | uncultured bacterium; L2T_300; EF551878                     | environmental samples:unclassified_environmental samples                                                                                                                           | 0.426      |
| Otu295 | 0               | 0    | 1   | 1   | uncultured Candidatus Rhabdochlamydia sp.; KF-9; EF445478   | Chlamydiae/Verrucomicrobia group:Chlamydiae:Chlamydia:Chlamydiales:Rhabdochlamydiaceae:Candidatus Rhabdochlamydia                                                                  | 0.455      |
| Otu296 | 0               | 0    | 0   | 3   | Mycobacterium sp. GICS; AY439252                            | Actinobacteria:Actinobacteria:Actinobacteridae:Actinomycetales:Corynebacterineae:Mycobacterium                                                                                     | 1          |
| Otu297 | 0               | 0    | 2   | 0   | uncultured bacterium; 070200719DMCFE10923; GU369404         | environmental samples:unclassified_environmental samples                                                                                                                           | 0.405      |
| Otu298 | 0               | 0    | 1   | 0   | uncultured bacterium; d1-57; AM409932                       | environmental samples:unclassified_environmental samples                                                                                                                           | 0.276      |
| Otu299 | 1               | 0    | 0   | 0   | Streptococcus mutans; CECT 4034; A554208                    | Firmicutes:Bacilli:Lactobacillales:Streptococcales:Streptococcus                                                                                                                   | 1          |
| Otu300 | 0               | 1    | 0   | 0   | uncultured bacterium; OS-60; AB205991                       | environmental samples:unclassified_environmental samples                                                                                                                           | 1          |
| Otu301 | 0               | 0    | 1   | 0   | endosymbiont of Metaseiulus occidentalis; AY279413          | Bacteroidetes/Chlorobi group:Bacteroidetes:unclassified Bacteroidetes:unclassified Bacteroidetes (miscellaneous):unclassified_unclassified Bacteroidetes (miscellaneous)           | 0.571      |
| Otu302 | 0               | 1    | 0   | 0   | uncultured bacterium; gs20; JF420626                        | environmental samples:unclassified_environmental samples                                                                                                                           | 0.417      |
| Otu303 | 0               | 0    | 0   | 3   | Candidatus Peptoniphilus massiliensis; 2; DQ029044          | Firmicutes:Clostridia:Clostridiales:Clostridiales incertae sedis:Clostridiales Family XI. Incertae Sedis:Peptoniphilus                                                             | 1          |
| Otu304 | 0               | 0    | 1   | 0   | uncultured Granulicatella sp.; BL005B21; AY806069           | Firmicutes:Bacilli:Lactobacillales:Carnobacteriaceae:Granulicatella                                                                                                                | 1          |
| Otu305 | 0               | 0    | 1   | 0   | uncultured bacterium; MW_62; HQ910898                       | environmental samples:unclassified_environmental samples                                                                                                                           | 0.524      |
| Otu306 | 0               | 0    | 1   | 0   | Pseudomonas fluorescens; CHA0r; AJ697956                    | Proteobacteria:Gammaproteobacteria:Pseudomonadales:Pseudomonadaceae:Pseudomonas                                                                                                    | 0.81       |
| Otu307 | 1               | 0    | 0   | 0   | uncultured bacterium; MW_62; HQ910898                       | environmental samples:unclassified_environmental samples                                                                                                                           | 0.591      |
| Otu308 | 0               | 0    | 1   | 0   | uncultured bacterium; G910P31FN13.10; EU172165              | environmental samples:unclassified_environmental samples                                                                                                                           | 0.645      |
| Otu309 | 0               | 0    | 0   | 1   | Lysinibacillus sp. SS-2009-PA8; FN646609                    | Firmicutes:Bacilli:Bacillales:Bacillaceae:Lysinibacillus                                                                                                                           | 0.774      |
| Otu310 | 0               | 0    | 1   | 0   | uncultured bacterium; G910P31FN13.10; EU172165              | environmental samples:unclassified_environmental samples                                                                                                                           | 0.519      |
| Otu311 | 0               | 0    | 0   | 1   | uncultured organism; SBZA_618; JN498434                     | unclassified_environmental samples                                                                                                                                                 | 0.429      |
| Otu312 | 1               | 0    | 0   | 0   | uncultured Candidatus Rhabdochlamydia sp.; KF-9; EF445478   | Chlamydiae/Verrucomicrobia group:Chlamydiae:Chlamydia:Chlamydiales:Rhabdochlamydiaceae:Candidatus Rhabdochlamydia                                                                  | 0.504      |
| Otu313 | 0               | 0    | 2   | 0   | Acinetobacter radioresistens; NW3-11; AY568483              | Proteobacteria:Gammaproteobacteria:Pseudomonadales:Moraxellaceae:Acinetobacter                                                                                                     | 0.57       |
| Otu314 | 0               | 0    | 0   | 1   | uncultured bacterium; UOXD-d04; EU869771                    | environmental samples:unclassified_environmental samples                                                                                                                           | 0.378      |
| Otu315 | 0               | 0    | 1   | 0   | gamma proteobacterium S-St(0)-78; AB074738                  | Proteobacteria:Gammaproteobacteria:unclassified Gammaproteobacteria:unclassified Gammaproteobacteria (miscellaneous):unclassified_unclassified Gammaproteobacteria (miscellaneous) | 1          |
| Otu316 | 0               | 0    | 1   | 1   | uncultured Desulfocapsa sp.; BFB101; KC545769               | Proteobacteria:delta/epsilon subdivisions:Delta/epsilon proteobacteria:Desulfobacterales:Desulfobulbaceae:Desulfocapsa                                                             | 0.275      |
| Otu317 | 0               | 0    | 0   | 1   | uncultured bacterium; TIC; KC352402                         | environmental samples:unclassified_environmental samples                                                                                                                           | 0.76       |
| Otu318 | 0               | 0    | 0   | 1   | Cardinium endosymbiont of Pseudoparlatoria sp.; GQ455416    | Bacteroidetes/Chlorobi group:Bacteroidetes:unclassified Bacteroidetes:Candidatus Cardinium                                                                                         | 0.457      |
| Otu319 | 0               | 0    | 0   | 1   | uncultured bacterium; Eldhufec321; AY920196                 | environmental samples:unclassified_environmental samples                                                                                                                           | 0.296      |
| Otu320 | 0               | 0    | 1   | 0   | Acinetobacter sp. IR-811; GU586302                          | Proteobacteria:Gammaproteobacteria:Pseudomonadales:Moraxellaceae:Acinetobacter                                                                                                     | 0.399      |
| Otu321 | 0               | 0    | 0   | 1   | uncultured epsilon proteobacterium; pYK04-188-6; AB235385   | Proteobacteria:delta/epsilon subdivisions:Epsilonproteobacteria:environmental samples:unclassified_environmental samples                                                           | 0.314      |
| Otu322 | 0               | 0    | 1   | 0   | uncultured bacterium; layman_j06; DQ980970                  | environmental samples:unclassified_environmental samples                                                                                                                           | 0.522      |
| Otu323 | 0               | 1    | 0   | 0   | uncultured Candidatus Rhabdochlamydia sp.; KF-9; EF445478   | Chlamydiae/Verrucomicrobia group:Chlamydiae:Chlamydia:Chlamydiales:Rhabdochlamydiaceae:Candidatus Rhabdochlamydia                                                                  | 0.46       |
| Otu324 | 0               | 0    | 1   | 0   | Rickettsia endosymbiont of Asobara tabida; At-R; FJ603467   | Proteobacteria:Alphaproteobacteria:Rickettsiales:Rickettsiaceae:Rickettsiae:Rickettsia                                                                                             | 0.455      |
| Otu325 | 0               | 1    | 0   | 0   | uncultured Candidatus Rhabdochlamydia sp.; KF-9; EF445478   | Chlamydiae/Verrucomicrobia group:Chlamydiae:Chlamydia:Chlamydiales:Rhabdochlamydiaceae:Candidatus Rhabdochlamydia                                                                  | 0.471      |
| Otu326 | 1               | 0    | 0   | 0   | uncultured Candidatus Rhabdochlamydia sp.; KF-9; EF445478   | Chlamydiae/Verrucomicrobia group:Chlamydiae:Chlamydia:Chlamydiales:Rhabdochlamydiaceae:Candidatus Rhabdochlamydia                                                                  | 0.545      |
| Otu327 | 0               | 0    | 0   | 1   | uncultured Candidatus Rhabdochlamydia sp.; KF-9; EF445478   | Chlamydiae/Verrucomicrobia group:Chlamydiae:Chlamydia:Chlamydiales:Rhabdochlamydiaceae:Candidatus Rhabdochlamydia                                                                  | 0.401      |
