# Supplementary material for: Endosymbiont Dominated Bacterial Communities in a Dwarf Spider
Source: PLoS One. 2015 Feb 23;10(2):e0117297. doi: 10.1371/journal.pone.0117297 (PMC4338242; doi:10.1371/journal.pone.0117297)
Supplement: S4 Information — OTU’s were determined by phylotype analysis wherein sequences were clustered according to their match with sequences in the SILVA database (as implemented in MOTHUR v 1.29.0) using the Greengenes taxonomic classification. (PDF) [file pone.0117297.s004.pdf]

| OTU    | Number of reads |        |        |        | Greengenes taxonomic classification                                                                                                                                                                                                                                               |  |  |  |
|--------|-----------------|--------|--------|--------|-----------------------------------------------------------------------------------------------------------------------------------------------------------------------------------------------------------------------------------------------------------------------------------|--|--|--|
|        | Wol-            | Wol+   | DAM    | WAL    |                                                                                                                                                                                                                                                                                   |  |  |  |
| Otu001 | 0               | 0      | 123    | 104    | Bacteria(100);Proteobacteria(100);Gammaproteobacteria(100);Xanthomonadales(100);Frateriura(100);Unclassified(100);unclassified(100);unclassified(100);unclassified(100);unclassified(100);                                                                                        |  |  |  |
| Otu002 | 369741          | 838377 | 651    | 771800 | Bacteria(100);Chlamydiae(100);Simkaniaceae(100);Unclassified(100);unclassified(100);unclassified(100);unclassified(100);unclassified(100);unclassified(100);unclassified(100);                                                                                                    |  |  |  |
| Otu003 | 113086          | 97931  | 415845 | 118093 | Bacteria(100);Bacteroidetes(100);Cardinidae(100);Candidatus_Cardinium(100);Unclassified(100);unclassified(100);unclassified(100);unclassified(100);unclassified(100);unclassified(100);                                                                                           |  |  |  |
| Otu004 | 11              | 19     | 303654 | 79     | Bacteria(100);Proteobacteria(100);Gammaproteobacteria(100);Moraxellaceae(100);Unclassified(100);unclassified(100);unclassified(100);unclassified(100);unclassified(100);unclassified(100);                                                                                        |  |  |  |
| Otu005 | 67993           | 12641  | 102503 | 93446  | Bacteria(100);Proteobacteria(100);Alphaproteobacteria(100);Consistiales(100);Rickettsiales(100);spotted_fever_group(100);unclassified(100);unclassified(100);unclassified(100);unclassified(100);unclassified(100);                                                               |  |  |  |
| Otu006 | 0               | 2      | 4      | 27     | Bacteria(100);Bacteroidetes(100);Saprospirales(100);FukuS23(100);Unclassified(100);unclassified(100);unclassified(100);unclassified(100);unclassified(100);unclassified(100);                                                                                                     |  |  |  |
| Otu007 | 3               | 64870  | 166081 | 92371  | Bacteria(100);Proteobacteria(100);Alphaproteobacteria(100);Consistiales(100);Rickettsiales(100);Wolbachia(100);Unclassified(100);unclassified(100);unclassified(100);unclassified(100);unclassified(100);                                                                         |  |  |  |
| Otu008 | 8               | 438    | 812    | 535    | Bacteria(100);Proteobacteria(100);Alphaproteobacteria(100);Consistiales(100);Rickettsiales(100);Wolbachia(100);Wolbachia_endosymbiont_of_Onchocerca_ochengi(100);unclassified(100);unclassified(100);unclassified(100);                                                           |  |  |  |
| Otu009 | 0               | 0      | 1      | 0      | Bacteria(100);Actinobacteria(100);Acidimicrobiae(100);Microthrixineae(100);Candidatus_Microthrix(100);unclassified(100);unclassified(100);unclassified(100);unclassified(100);unclassified(100);                                                                                  |  |  |  |
| Otu010 | 238             | 459    | 9      | 515    | Bacteria(100);Acidobacteria(100);Acidobacteriales(100);K-5b2(100);Unclassified(100);unclassified(100);unclassified(100);unclassified(100);unclassified(100);unclassified(100);                                                                                                    |  |  |  |
| Otu011 | 364             | 827    | 6      | 786    | Bacteria(100);Firmicutes(100);Clostridia(100);Clostridiales(100);Clostridium_viride(100);UC9-83(100);Unclassified(100);unclassified(100);unclassified(100);unclassified(100);unclassified(100);                                                                                   |  |  |  |
| Otu012 | 0               | 0      | 0      | 4      | Bacteria(100);Firmicutes(100);Clostridia(100);Clostridiales(100);butyrate-producing_bacterium_A2-207(100);Unclassified(100);unclassified(100);unclassified(100);unclassified(100);unclassified(100);                                                                              |  |  |  |
| Otu013 | 7               | 1      | 13     | 8      | Bacteria(100);Firmicutes(100);Clostridia(100);Peptostreptococcaceae(100);Frigovirgula_patagoniensis(100);Clostridium_sticklandii(100);unclassified(100);unclassified(100);unclassified(100);unclassified(100);                                                                    |  |  |  |
| Otu014 | 0               | 0      | 1      | 0      | Bacteria(100);Fusobacteria(100);Propionigeniaceae(100);Unclassified(100);unclassified(100);unclassified(100);unclassified(100);unclassified(100);unclassified(100);unclassified(100);                                                                                             |  |  |  |
| Otu015 | 0               | 2      | 70     | 129    | Bacteria(100);Proteobacteria(100);Alphaproteobacteria(100);Caulobacterales(100);Brevundimonas(100);Unclassified(100);unclassified(100);unclassified(100);unclassified(100);unclassified(100);unclassified(100);                                                                   |  |  |  |
| Otu016 | 18              | 61     | 3      | 54     | Bacteria(100);Proteobacteria(100);Deltaproteobacteria(100);Desulfobacterium_catecholicum(100);Unclassified(100);unclassified(100);unclassified(100);unclassified(100);unclassified(100);unclassified(100);                                                                        |  |  |  |
| Otu017 | 0               | 0      | 3      | 0      | Bacteria(100);Actinobacteria(100);Acidimicrobiae(100);Acidimicrobiaceae(100);Unclassified(100);unclassified(100);unclassified(100);unclassified(100);unclassified(100);unclassified(100);                                                                                         |  |  |  |
| Otu018 | 0               | 0      | 19     | 575    | Bacteria(100);Bacteroidetes(100);Saprospirales(100);Unclassified(100);unclassified(100);unclassified(100);unclassified(100);unclassified(100);unclassified(100);unclassified(100);                                                                                                |  |  |  |
| Otu019 | 0               | 0      | 233    | 0      | Bacteria(100);Proteobacteria(100);Gammaproteobacteria(100);Enterobacteriales_Enterobacteriaceae(100);Plesiomonas(100);unclassified(100);unclassified(100);unclassified(100);unclassified(100);unclassified(100);                                                                  |  |  |  |
| Otu020 | 77              | 193    | 2      | 190    | Bacteria(100);Spirochaetes(100);Treponemaceae(100);Treponema(100);RF599(100);Unclassified(100);unclassified(100);unclassified(100);unclassified(100);unclassified(100);unclassified(100);                                                                                         |  |  |  |
| Otu021 | 0               | 0      | 326    | 0      | Bacteria(100);Proteobacteria(100);Gammaproteobacteria(100);Piscirickettsiaceae(100);Thiobacillus_barengensis(100);Thiovirga(100);unclassified(100);unclassified(100);unclassified(100);unclassified(100);                                                                         |  |  |  |
| Otu022 | 0               | 0      | 5      | 3      | Bacteria(100);Bacteroidetes(100);Bacteroidales(100);AU126(100);Rs-P01(100);unclassified(100);unclassified(100);unclassified(100);unclassified(100);unclassified(100);unclassified(100);                                                                                           |  |  |  |
| Otu023 | 7               | 10     | 3      | 11     | Bacteria(100);Planctomycetes(100);Planctomycetacia(100);Pirellulales(100);unclassified(100);unclassified(100);unclassified(100);unclassified(100);unclassified(100);unclassified(100);                                                                                            |  |  |  |
| Otu024 | 4               | 1      | 6      | 2      | Bacteria(100);Proteobacteria(100);Alphaproteobacteria(100);Consistiales(100);Rickettsiales(100);Unclassified(100);unclassified(100);unclassified(100);unclassified(100);unclassified(100);unclassified(100);                                                                      |  |  |  |
| Otu025 | 68              | 0      | 2      | 533    | Bacteria(100);Firmicutes(100);Clostridia(100);Clostridiales(100);Clostridium_neopropionicum(100);unclassified(100);unclassified(100);unclassified(100);unclassified(100);unclassified(100);unclassified(100);                                                                     |  |  |  |
| Otu026 | 2               | 1      | 10     | 1      | Bacteria(100);Spirochaetes(100);Brevinema(100);unclassified(100);unclassified(100);unclassified(100);unclassified(100);unclassified(100);unclassified(100);unclassified(100);unclassified(100);                                                                                   |  |  |  |
| Otu027 | 1               | 5      | 9      | 4      | Bacteria(100);Proteobacteria(100);Alphaproteobacteria(100);Bradyrhizobiales(100);Nitrobacter(100);unclassified(100);unclassified(100);unclassified(100);unclassified(100);unclassified(100);unclassified(100);                                                                    |  |  |  |
| Otu028 | 0               | 0      | 3      | 2      | Bacteria(100);Bacteroidetes(100);JTB248(100);unclassified(100);unclassified(100);unclassified(100);unclassified(100);unclassified(100);unclassified(100);unclassified(100);unclassified(100);                                                                                     |  |  |  |
| Otu029 | 6               | 6      | 4      | 6      | Bacteria(100);MBMPE71(100);unclassified(100);unclassified(100);unclassified(100);unclassified(100);unclassified(100);unclassified(100);unclassified(100);unclassified(100);unclassified(100);                                                                                     |  |  |  |
| Otu030 | 0               | 1      | 6      | 3      | Bacteria(100);Proteobacteria(100);Epsilonproteobacteria(100);Sulfurospirillaceae(100);Sulfurospirillum_arcachonense(100);unclassified(100);unclassified(100);unclassified(100);unclassified(100);unclassified(100);                                                               |  |  |  |
| Otu031 | 114             | 280    | 1      | 293    | Bacteria(100);Chlamydiae(100);Chlamydomonadophila(100);Unclassified(100);unclassified(100);unclassified(100);unclassified(100);unclassified(100);unclassified(100);unclassified(100);unclassified(100);                                                                           |  |  |  |
| Otu032 | 0               | 0      | 4      | 1      | Bacteria(100);Proteobacteria(100);Alphaproteobacteria(100);S23_91(100);unclassified(100);unclassified(100);unclassified(100);unclassified(100);unclassified(100);unclassified(100);unclassified(100);unclassified(100);                                                           |  |  |  |
| Otu033 | 89              | 10     | 119    | 126    | Bacteria(100);Firmicutes(100);Clostridia(100);Peptostreptococcaceae(100);Clostridium_felsineum(100);Unclassified(100);unclassified(100);unclassified(100);unclassified(100);unclassified(100);unclassified(100);                                                                  |  |  |  |
| Otu034 | 0               | 0      | 3335   | 12     | Bacteria(100);Proteobacteria(100);Gammaproteobacteria(100);Enterobacteriales_Enterobacteriaceae(100);Unclassified(100);unclassified(100);unclassified(100);unclassified(100);unclassified(100);unclassified(100);unclassified(100);                                               |  |  |  |
| Otu035 | 0               | 0      | 1      | 0      | Bacteria(100);Chrysiogenetes(100);unclassified(100);unclassified(100);unclassified(100);unclassified(100);unclassified(100);unclassified(100);unclassified(100);unclassified(100);unclassified(100);                                                                              |  |  |  |
| Otu036 | 3               | 0      | 12     | 6      | Bacteria(100);NKB19(100);Unclassified(100);unclassified(100);unclassified(100);unclassified(100);unclassified(100);unclassified(100);unclassified(100);unclassified(100);unclassified(100);                                                                                       |  |  |  |
| Otu037 | 17              | 7      | 84     | 32     | Bacteria(100);Firmicutes(100);Clostridia(100);Clostridiales(100);Faecalibacterium(100);Subdoligranulum(100);unclassified(100);unclassified(100);unclassified(100);unclassified(100);unclassified(100);unclassified(100);                                                          |  |  |  |
| Otu038 | 8               | 13     | 0      | 18     | Bacteria(100);Acidobacteria(100);PAUC37f(100);unclassified(100);unclassified(100);unclassified(100);unclassified(100);unclassified(100);unclassified(100);unclassified(100);unclassified(100);unclassified(100);                                                                  |  |  |  |
| Otu039 | 0               | 2      | 351    | 0      | Bacteria(100);Proteobacteria(100);Gammaproteobacteria(100);Enterobacteriales_Enterobacteriaceae(100);Candidatus_Blochmannia(100);Blochmannia(100);unclassified(100);unclassified(100);unclassified(100);unclassified(100);unclassified(100);unclassified(100);                    |  |  |  |
| Otu040 | 0               | 0      | 9      | 0      | Bacteria(100);Proteobacteria(100);Gammaproteobacteria(100);Betaproteobacteria(100);Ralstoniaceae(100);Unclassified(100);unclassified(100);unclassified(100);unclassified(100);unclassified(100);unclassified(100);                                                                |  |  |  |
| Otu041 | 0               | 0      | 10     | 0      | Bacteria(100);Verrucomicrobia(100);TP21(100);unclassified(100);unclassified(100);unclassified(100);unclassified(100);unclassified(100);unclassified(100);unclassified(100);unclassified(100);                                                                                     |  |  |  |
| Otu042 | 0               | 0      | 139    | 1      | Bacteria(100);ZB3(100);Unclassified(100);unclassified(100);unclassified(100);unclassified(100);unclassified(100);unclassified(100);unclassified(100);unclassified(100);unclassified(100);                                                                                         |  |  |  |
| Otu043 | 0               | 0      | 14     | 0      | Bacteria(100);Acidobacteria(100);iii1-15(100);Riz6i(100);Unclassified(100);unclassified(100);unclassified(100);unclassified(100);unclassified(100);unclassified(100);unclassified(100);unclassified(100);                                                                         |  |  |  |
| Otu044 | 2               | 1      | 28     | 5      | Bacteria(100);Proteobacteria(100);Gammaproteobacteria(100);ZA3412c(100);Unclassified(100);unclassified(100);unclassified(100);unclassified(100);unclassified(100);unclassified(100);unclassified(100);unclassified(100);                                                          |  |  |  |
| Otu045 | 0               | 1      | 1      | 0      | Bacteria(100);Actinobacteria(100);Actinobacteridae(100);Gordoniaceae(100);Corynebacteriaceae(100);Corynebacterium_kroppenstedtii(100);unclassified(100);unclassified(100);unclassified(100);unclassified(100);unclassified(100);                                                  |  |  |  |
| Otu046 | 9               | 14     | 8      | 36     | Bacteria(100);Proteobacteria(100);Deltaproteobacteria(100);Myxococcales(100);OM27(100);CTD005-738-02(100);ctg_CGOF163(100);unclassified(100);unclassified(100);unclassified(100);unclassified(100);unclassified(100);                                                             |  |  |  |
| Otu047 | 0               | 0      | 3      | 0      | Bacteria(100);Proteobacteria(100);Gammaproteobacteria(100);Ferrimonadaceae(100);Unclassified(100);unclassified(100);unclassified(100);unclassified(100);unclassified(100);unclassified(100);unclassified(100);unclassified(100);                                                  |  |  |  |
| Otu048 | 1               | 0      | 3      | 0      | Bacteria(100);Firmicutes(100);Clostridia(100);Clostridiales(100);Clostridiaceae(100);Clostridium_autoethanogenum(100);unclassified(100);unclassified(100);unclassified(100);unclassified(100);unclassified(100);unclassified(100);                                                |  |  |  |
| Otu049 | 4               | 4      | 2      | 10     | Bacteria(100);Halanaerobiales(100);Halanaerobacteriaceae(100);unclassified(100);unclassified(100);unclassified(100);unclassified(100);unclassified(100);unclassified(100);unclassified(100);unclassified(100);unclassified(100);                                                  |  |  |  |
| Otu050 | 0               | 0      | 0      | 17     | Bacteria(100);EM3(100);SRI-15(100);unclassified(100);unclassified(100);unclassified(100);unclassified(100);unclassified(100);unclassified(100);unclassified(100);unclassified(100);unclassified(100);                                                                             |  |  |  |
| Otu051 | 0               | 0      | 9      | 26     | Bacteria(100);Proteobacteria(100);Gammaproteobacteria(100);Xanthomonadales(100);Frateriura(100);Rhodanobacter(100);unclassified(100);unclassified(100);unclassified(100);unclassified(100);unclassified(100);unclassified(100);                                                   |  |  |  |
| Otu052 | 0               | 0      | 2      | 1      | Bacteria(100);Proteobacteria(100);Epsilonproteobacteria(100);PeH32(100);unclassified(100);unclassified(100);unclassified(100);unclassified(100);unclassified(100);unclassified(100);unclassified(100);unclassified(100);                                                          |  |  |  |
| Otu053 | 2               | 0      | 1      | 3      | Bacteria(100);Bacteroidetes(100);Sphingobacteriaceae(100);Sphingobacterium(100);Unclassified(100);unclassified(100);unclassified(100);unclassified(100);unclassified(100);unclassified(100);unclassified(100);unclassified(100);                                                  |  |  |  |
| Otu054 | 0               | 0      | 0      | 24     | Bacteria(100);Firmicutes(100);Clostridia(100);Clostridiales(100);AN1045(100);unclassified(100);unclassified(100);unclassified(100);unclassified(100);unclassified(100);unclassified(100);unclassified(100);unclassified(100);                                                     |  |  |  |
| Otu055 | 0               | 0      | 64     | 0      | Bacteria(100);Proteobacteria(100);Gammaproteobacteria(100);Enterobacteriales_Enterobacteriaceae(100);Candidatus_Blochmannia(100);Unclassified(100);unclassified(100);unclassified(100);unclassified(100);unclassified(100);unclassified(100);unclassified(100);unclassified(100); |  |  |  |
| Otu056 | 0               | 0      | 2      | 0      | Bacteria(100);Firmicutes(100);Allycyclobacillus(100);Allycyclobacillus_acidocaldarius(100);Allycyclobacillus_tolerans(100);unclassified(100);unclassified(100);unclassified(100);unclassified(100);unclassified(100);unclassified(100);                                           |  |  |  |
| Otu057 | 0               | 2      | 0      | 4      | Bacteria(100);Proteobacteria(100);Alphaproteobacteria(100);H4(100);H29(100);unclassified(100);unclassified(100);unclassified(100);unclassified(100);unclassified(100);unclassified(100);unclassified(100);unclassified(100);                                                      |  |  |  |
| Otu058 | 2               | 5      | 0      | 131    | Bacteria(100);Proteobacteria(100);Desulfurellales(100);Desulfurellaceae(100);Desulfurella(100);unclassified(100);unclassified(100);unclassified(100);unclassified(100);unclassified(100);unclassified(100);unclassified(100);unclassified(100);                                   |  |  |  |
| Otu059 | 0               | 0      | 0      | 47     | Bacteria(100);Firmicutes(100);Acidaminococcaceae(100);Unclassified(100);unclassified(100);unclassified(100);unclassified(100);unclassified(100);unclassified(100);unclassified(100);unclassified(100);unclassified(100);                                                          |  |  |  |
| Otu060 | 1               | 5      | 50     | 124    | Bacteria(100);Proteobacteria(100);Gammaproteobacteria(100);Pseudomonadaceae(100);Unclassified(100);unclassified(100);unclassified(100);unclassified(100);unclassified(100);unclassified(100);unclassified(100);unclassified(100);unclassified(100);                               |  |  |  |
| Otu061 | 6               | 1      | 8      | 9      | Bacteria(100);Firmicutes(100);Bacilli(100);Lactobacillales(100);Aerococcaceae(100);Turicibacter(100);Turicibacter_sanguinis(100);NB1-n(100);unclassified(100);unclassified(100);unclassified(100);unclassified(100);unclassified(100);                                            |  |  |  |
| Otu062 | 0               | 0      | 0      | 42     | Bacteria(100);Firmicutes(100);Bacilli(100);Bacillus_cereus(100);unclassified(100);unclassified(100);unclassified(100);unclassified(100);unclassified(100);unclassified(100);unclassified(100);unclassified(100);unclassified(100);                                                |  |  |  |
| Otu063 | 12              | 1      | 25     | 15     | Bacteria(100);Firmicutes(100);Clostridia(100);Clostridiales(100);S-P1-30(100);unclassified(100);unclassified(100);unclassified(100);unclassified(100);unclassified(100);unclassified(100);unclassified(100);unclassified(100);                                                    |  |  |  |
| Otu064 | 0               | 0      | 14     | 165    | Bacteria(100);Actinobacteria(100);Actinobacteridae(100);Propionibacteriaceae(100);Nocardioideae(100);unclassified(100);unclassified(100);unclassified(100);unclassified(100);unclassified(100);unclassified(100);unclassified(100);unclassified(100);                             |  |  |  |
| Otu065 | 5               | 17     | 1      | 23     | Bacteria(100);Aquificae(100);Aquificae(100);Aquificales(100);Hydrogenobaculum(100);unclassified(100);unclassified(100);unclassified(100);unclassified(100);unclassified(100);unclassified(100);unclassified(100);unclassified(100);                                               |  |  |  |
| Otu066 | 5               | 19     | 27     | 24     | Bacteria(100);Proteobacteria(100);Epsilonproteobacteria(100);Helicobacteriales(100);Helicobacteraceae(100);Helicobacter(100);Helicobacter_vulpecula(100);unclassified(100);unclassified(100);unclassified(100);unclassified(100);unclassified(100);unclassified(100);             |  |  |  |

| OTU    | Number of reads |      |     |     | Greengenes taxonomic classification                                                                                                                                                                                        |  |  |  |
|--------|-----------------|------|-----|-----|----------------------------------------------------------------------------------------------------------------------------------------------------------------------------------------------------------------------------|--|--|--|
|        | Wol-            | Wol+ | DAM | WAL |                                                                                                                                                                                                                            |  |  |  |
| Otu067 | 1               | 2    | 4   |     | 5 Bacteria(100);Firmicutes(100);Clostridia(100);Clostridiales(100);Oxobacter(100);unclassified(100);unclassified(100);unclassified(100);unclassified(100);                                                                 |  |  |  |
| Otu068 | 0               | 0    | 69  |     | 0 Bacteria(100);Proteobacteria(100);Gammaproteobacteria(100);Moraxellaceae(100);Moraxella_Psychrobacter(100);Enhydrobacter(100);unclassified(100);unclassified(100);unclassified(100);                                     |  |  |  |
| Otu069 | 0               | 0    | 3   |     | 0 Bacteria(100);Proteobacteria(100);Gammaproteobacteria(100);Enterobacteriales_Enterobacteriaceae(100);Serratia_symbiotica(100);unclassified(100);unclassified(100);unclassified(100);unclassified(100);unclassified(100); |  |  |  |
| Otu070 | 0               | 0    | 310 |     | 34 Bacteria(100);Firmicutes(100);Clostridia(100);Clostridiales(100);Coproccoccus(100);unclassified(100);unclassified(100);unclassified(100);unclassified(100);unclassified(100);                                           |  |  |  |
| Otu071 | 1               | 0    | 0   |     | 1 Bacteria(100);Acidobacteria(100);S035(100);unclassified(100);unclassified(100);unclassified(100);unclassified(100);unclassified(100);                                                                                    |  |  |  |
| Otu072 | 3               | 0    | 13  |     | 13 Bacteria(100);Firmicutes(100);Clostridia(100);Peptostreptococcaceae(100);Peptoniphilus(100);Anaerococcus(100);Unclassified(100);unclassified(100);unclassified(100);unclassified(100);                                  |  |  |  |
| Otu073 | 3               | 0    | 9   |     | 30 Bacteria(100);Proteobacteria(100);Gammaproteobacteria(100);Xanthomonadales(100);unclassified(100);unclassified(100);unclassified(100);unclassified(100);unclassified(100);                                              |  |  |  |
| Otu074 | 0               | 0    | 19  |     | 3 Bacteria(100);Firmicutes(100);Clostridia(100);Clostridiales(100);Clostridium_aminovalericum(100);unclassified(100);unclassified(100);unclassified(100);unclassified(100);unclassified(100);                              |  |  |  |
| Otu075 | 0               | 0    | 0   |     | 61 Bacteria(100);Planctomycetes(100);Planctomycetacia(100);Planctomycetales(100);Unclassified(100);unclassified(100);unclassified(100);unclassified(100);unclassified(100);unclassified(100);                              |  |  |  |
| Otu076 | 2               | 1    | 4   |     | 4 Bacteria(100);Firmicutes(100);Mollicutes(100);RF39(100);adhufec202(100);FM046(100);unclassified(100);unclassified(100);unclassified(100);unclassified(100);unclassified(100);                                            |  |  |  |
| Otu077 | 0               | 0    | 0   |     | 41 Bacteria(100);Verrucomicrobia(100);Spartobacteria(100);Chthoniobacter(100);unclassified(100);unclassified(100);unclassified(100);unclassified(100);unclassified(100);unclassified(100);                                 |  |  |  |
| Otu078 | 0               | 0    | 0   |     | 23 Bacteria(100);Bacteroidetes(100);Pedobacter(100);unclassified(100);unclassified(100);unclassified(100);unclassified(100);unclassified(100);unclassified(100);unclassified(100);                                         |  |  |  |
| Otu079 | 0               | 0    | 2   |     | 1 Bacteria(100);Proteobacteria(100);Alphaproteobacteria(100);Consistiales(100);Rickettsiales(100);Anaplasma(100);Unclassified(100);unclassified(100);unclassified(100);unclassified(100);                                  |  |  |  |
| Otu080 | 0               | 0    | 4   |     | 0 Bacteria(100);OP10(100);SJA-176(100);unclassified(100);unclassified(100);unclassified(100);unclassified(100);unclassified(100);unclassified(100);unclassified(100);                                                      |  |  |  |
| Otu081 | 0               | 1    | 136 |     | 53 Bacteria(100);Firmicutes(100);Bacilli(100);Lactobacillales(100);Aerococcaceae(100);Abiotrophia(100);unclassified(100);unclassified(100);unclassified(100);unclassified(100);unclassified(100);                          |  |  |  |
| Otu082 | 0               | 0    | 28  |     | 0 Bacteria(100);Proteobacteria(100);Gammaproteobacteria(100);Alteromonadales(100);Pseudoalteromonadaceae(100);Pseudoalteromonas_spongiae(100);unclassified(100);unclassified(100);unclassified(100);unclassified(100);     |  |  |  |
| Otu083 | 0               | 0    | 18  |     | 18 Bacteria(100);Bacteroidetes(100);Saprosirales(100);Bis8(100);unclassified(100);unclassified(100);unclassified(100);unclassified(100);unclassified(100);unclassified(100);unclassified(100);                             |  |  |  |
| Otu084 | 0               | 4    | 4   |     | 1 Bacteria(100);Firmicutes(100);Mollicutes(100);Mycoplasmatales(100);Mycoplasma(100);Mycoplasma_foculare(100);Unclassified(100);unclassified(100);unclassified(100);unclassified(100);                                     |  |  |  |
| Otu085 | 1               | 2    | 0   |     | 2 Bacteria(100);Firmicutes(100);Clostridia(100);Clostridiales(100);p-3487-9F3(100);unclassified(100);unclassified(100);unclassified(100);unclassified(100);unclassified(100);                                              |  |  |  |
| Otu086 | 0               | 0    | 17  |     | 0 Bacteria(100);Bacteroidetes(100);Bacteroidales(100);Marinilabiaceae(100);Unclassified(100);unclassified(100);unclassified(100);unclassified(100);unclassified(100);unclassified(100);                                    |  |  |  |
| Otu087 | 0               | 0    | 29  |     | 10 Bacteria(100);Proteobacteria(100);Alphaproteobacteria(100);Bradyrhizobiales(100);Bradyrhizobium_japonicum(100);Rhodopseudomonas_palustris(100);Unclassified(100);unclassified(100);unclassified(100);unclassified(100); |  |  |  |
| Otu088 | 3               | 0    | 1   |     | 4 Bacteria(100);Firmicutes(100);Mollicutes(100);Clostridium_aff_innocuum_CM970(100);Erysipelothrix(100);Unclassified(100);unclassified(100);unclassified(100);unclassified(100);unclassified(100);                         |  |  |  |
| Otu089 | 0               | 1    | 0   |     | 0 Bacteria(100);Planctomycetes(100);WPS-1(100);BD2-16(100);Unclassified(100);unclassified(100);unclassified(100);unclassified(100);unclassified(100);unclassified(100);                                                    |  |  |  |
| Otu090 | 0               | 2    | 2   |     | 3 Bacteria(100);Proteobacteria(100);Gammaproteobacteria(100);Betaproteobacteria(100);Sutterellaceae(100);Sutterella(100);unclassified(100);unclassified(100);unclassified(100);unclassified(100);                          |  |  |  |
| Otu091 | 1               | 1    | 1   |     | 5 Bacteria(100);Firmicutes(100);Clostridia(100);Peptostreptococcaceae(100);Peptoniphilus(100);Peptoniphilus_indolicus(100);unclassified(100);unclassified(100);unclassified(100);unclassified(100);                        |  |  |  |
| Otu092 | 0               | 0    | 35  |     | 2 Bacteria(100);Proteobacteria(100);Gammaproteobacteria(100);AEGEAN_245(100);unclassified(100);unclassified(100);unclassified(100);unclassified(100);unclassified(100);unclassified(100);                                  |  |  |  |
| Otu093 | 0               | 0    | 1   |     | 0 Bacteria(100);Proteobacteria(100);Gammaproteobacteria(100);Chromatiaceae(100);Allochrochromium(100);unclassified(100);unclassified(100);unclassified(100);unclassified(100);unclassified(100);                           |  |  |  |
| Otu094 | 1               | 1    | 6   |     | 1 Bacteria(100);Lentisphaerae(100);Victivallales(100);Victivallaceae(100);Unclassified(100);unclassified(100);unclassified(100);unclassified(100);unclassified(100);unclassified(100);                                     |  |  |  |
| Otu095 | 0               | 0    | 22  |     | 1 Bacteria(100);Bacteroidetes(100);Saprosirales(100);cilia-associated_respiratory_bacterium_R3(100);unclassified(100);unclassified(100);unclassified(100);unclassified(100);unclassified(100);unclassified(100);           |  |  |  |
| Otu096 | 0               | 0    | 0   |     | 12 Bacteria(100);Proteobacteria(100);Gammaproteobacteria(100);Xanthomonadales(100);Stenotrophomonas(100);unclassified(100);unclassified(100);unclassified(100);unclassified(100);unclassified(100);unclassified(100);      |  |  |  |
| Otu097 | 1               | 0    | 0   |     | 0 Bacteria(100);Firmicutes(100);Clostridia(100);Clostridiales(100);Ruminococcus(100);Rs-B44(100);unclassified(100);unclassified(100);unclassified(100);unclassified(100);unclassified(100);                                |  |  |  |
| Otu098 | 0               | 0    | 2   |     | 0 Bacteria(100);Proteobacteria(100);Gammaproteobacteria(100);Enterobacteriales_Enterobacteriaceae(100);Baumannia(100);unclassified(100);unclassified(100);unclassified(100);unclassified(100);unclassified(100);           |  |  |  |
| Otu099 | 2               | 0    | 18  |     | 0 Bacteria(100);Thermi(100);Thermales(100);Meiothermaceae(100);Meiothermus_silvanus(100);unclassified(100);unclassified(100);unclassified(100);unclassified(100);unclassified(100);unclassified(100);                      |  |  |  |
| Otu100 | 1               | 2    | 1   |     | 6 Bacteria(100);Thermotogae(100);unclassified(100);unclassified(100);unclassified(100);unclassified(100);unclassified(100);unclassified(100);unclassified(100);unclassified(100);                                          |  |  |  |
| Otu101 | 0               | 0    | 0   |     | 15 Bacteria(100);Proteobacteria(100);Epsilonproteobacteria(100);Arcobacteraceae(100);Unclassified(100);unclassified(100);unclassified(100);unclassified(100);unclassified(100);unclassified(100);                          |  |  |  |
| Otu102 | 0               | 1    | 4   |     | 0 Bacteria(100);Chloroflexi(100);Anaerolineae(100);Anaerolineales(100);C1_B004(100);unclassified(100);unclassified(100);unclassified(100);unclassified(100);unclassified(100);unclassified(100);                           |  |  |  |
| Otu103 | 0               | 0    | 5   |     | 1 Bacteria(100);Planctomycetes(100);Planctomycetacia(100);A17(100);PRR-7(100);BCF2-25(100);unclassified(100);unclassified(100);unclassified(100);unclassified(100);unclassified(100);unclassified(100);                    |  |  |  |
| Otu104 | 5               | 6    | 5   |     | 11 Bacteria(100);Planctomycetes(100);Planctomycetacia(100);DEL17(100);agg8(100);Unclassified(100);unclassified(100);unclassified(100);unclassified(100);unclassified(100);unclassified(100);                               |  |  |  |
| Otu105 | 0               | 0    | 0   |     | 41 Bacteria(100);Bacteroidetes(100);Saprosirales(100);FukuN24(100);Unclassified(100);unclassified(100);unclassified(100);unclassified(100);unclassified(100);unclassified(100);unclassified(100);                          |  |  |  |
| Otu106 | 0               | 0    | 21  |     | 0 Bacteria(100);Proteobacteria(100);Gammaproteobacteria(100);Halothiobacillaceae(100);Unclassified(100);unclassified(100);unclassified(100);unclassified(100);unclassified(100);unclassified(100);                         |  |  |  |
| Otu107 | 3               | 9    | 13  |     | 9 Bacteria(100);Proteobacteria(100);Gammaproteobacteria(100);Aeromonadaceae(100);Tolomonas(100);unclassified(100);unclassified(100);unclassified(100);unclassified(100);unclassified(100);unclassified(100);               |  |  |  |
| Otu108 | 6               | 0    | 18  |     | 0 Bacteria(100);Proteobacteria(100);Deltaproteobacteria(100);CD005-82B-02(100);unclassified(100);unclassified(100);unclassified(100);unclassified(100);unclassified(100);unclassified(100);                                |  |  |  |
| Otu109 | 0               | 0    | 0   |     | 6 Bacteria(100);Bacteroidetes(100);Flavobacteriales(100);unclassified(100);unclassified(100);unclassified(100);unclassified(100);unclassified(100);unclassified(100);unclassified(100);                                    |  |  |  |
| Otu110 | 0               | 0    | 3   |     | 0 Bacteria(100);Actinobacteria(100);Actinobacteridae(100);Nesterenkonia(100);unclassified(100);unclassified(100);unclassified(100);unclassified(100);unclassified(100);unclassified(100);unclassified(100);                |  |  |  |
| Otu111 | 0               | 0    | 0   |     | 1 Bacteria(100);Gemmatimonadetes(100);Gemmatimonadales(100);Unclassified(100);unclassified(100);unclassified(100);unclassified(100);unclassified(100);unclassified(100);unclassified(100);                                 |  |  |  |
| Otu112 | 2               | 1    | 19  |     | 21 Bacteria(100);Bacteroidetes(100);Saprosirales(100);FukuN24(100);GL182(100);unclassified(100);unclassified(100);unclassified(100);unclassified(100);unclassified(100);unclassified(100);                                 |  |  |  |
| Otu113 | 0               | 0    | 0   |     | 2 Bacteria(100);Gemmatimonadetes(100);Gemm-1b(100);Unclassified(100);unclassified(100);unclassified(100);unclassified(100);unclassified(100);unclassified(100);unclassified(100);unclassified(100);                        |  |  |  |
| Otu114 | 1               | 0    | 1   |     | 0 Bacteria(100);Firmicutes(100);Clostridia(100);Clostridiales(100);Ruminococcus(100);PL-38B10(100);unclassified(100);unclassified(100);unclassified(100);unclassified(100);unclassified(100);unclassified(100);            |  |  |  |
| Otu115 | 0               | 2    | 2   |     | 1 Bacteria(100);ZB2(100);BD5-13(100);BD5-13(100);unclassified(100);unclassified(100);unclassified(100);unclassified(100);unclassified(100);unclassified(100);unclassified(100);unclassified(100);                          |  |  |  |
| Otu116 | 3               | 5    | 2   |     | 2 Bacteria(100);Firmicutes(100);Clostridia(100);Clostridiales(100);Ruminococcus(100);p-1082-a5(100);Unclassified(100);unclassified(100);unclassified(100);unclassified(100);unclassified(100);unclassified(100);           |  |  |  |
| Otu117 | 0               | 2    | 3   |     | 0 Bacteria(100);Bacteroidetes(100);Bacteroidales(100);Odoribacteriaceae(100);Unclassified(100);unclassified(100);unclassified(100);unclassified(100);unclassified(100);unclassified(100);unclassified(100);                |  |  |  |
| Otu118 | 2               | 0    | 4   |     | 1 Bacteria(100);Bacteroidetes(100);Thermomonema(100);unclassified(100);unclassified(100);unclassified(100);unclassified(100);unclassified(100);unclassified(100);unclassified(100);unclassified(100);                      |  |  |  |
| Otu119 | 0               | 0    | 3   |     | 1 Bacteria(100);Bacteroidetes(100);Flavobacteriales(100);Blattabacteriaceae(100);Unclassified(100);unclassified(100);unclassified(100);unclassified(100);unclassified(100);unclassified(100);unclassified(100);            |  |  |  |
| Otu120 | 0               | 0    | 1   |     | 0 Bacteria(100);ABY1_OD1(100);FW129(100);Unclassified(100);unclassified(100);unclassified(100);unclassified(100);unclassified(100);unclassified(100);unclassified(100);unclassified(100);                                  |  |  |  |
| Otu121 | 0               | 0    | 2   |     | 3 Bacteria(100);Bacteroidetes(100);Saprosirales(100);Terrimonaceae(100);Niabella(100);unclassified(100);unclassified(100);unclassified(100);unclassified(100);unclassified(100);unclassified(100);                         |  |  |  |
| Otu122 | 0               | 0    | 0   |     | 1 Bacteria(100);Firmicutes(100);Clostridia(100);Peptostreptococcaceae(100);Peptostreptococcus_anaerobius(100);Unclassified(100);unclassified(100);unclassified(100);unclassified(100);unclassified(100);                   |  |  |  |
| Otu123 | 0               | 0    | 1   |     | 0 Bacteria(100);Chlorobi(100);Chlorobiales(100);Chlorobaculum(100);unclassified(100);unclassified(100);unclassified(100);unclassified(100);unclassified(100);unclassified(100);unclassified(100);                          |  |  |  |
| Otu124 | 0               | 0    | 35  |     | 0 Bacteria(100);Proteobacteria(100);Gammaproteobacteria(100);Betaproteobacteria(100);Rhodocyclales(100);beta_proteobacterium_F06002(100);IRD18C09(100);unclassified(100);unclassified(100);unclassified(100);              |  |  |  |
| Otu125 | 4               | 6    | 2   |     | 9 Bacteria(100);Acidobacteria(100);Acidobacteriae(100);WJ7(100);unclassified(100);unclassified(100);unclassified(100);unclassified(100);unclassified(100);unclassified(100);unclassified(100);unclassified(100);           |  |  |  |
| Otu126 | 0               | 0    | 2   |     | 0 Bacteria(100);Actinobacteria(100);Actinobacteridae(100);Intrasporangiaceae(100);Dermacoccus(100);unclassified(100);unclassified(100);unclassified(100);unclassified(100);unclassified(100);unclassified(100);            |  |  |  |
| Otu127 | 2               | 2    | 11  |     | 1 Bacteria(100);Proteobacteria(100);Alphaproteobacteria(100);Rhodobacterales(100);Rhodobacter(100);Unclassified(100);unclassified(100);unclassified(100);unclassified(100);unclassified(100);unclassified(100);            |  |  |  |
| Otu128 | 0               | 0    | 0   |     | 1 Bacteria(100);Actinobacteria(100);Actinobacteridae(100);Gordoniaceae(100);unclassified(100);unclassified(100);unclassified(100);unclassified(100);unclassified(100);unclassified(100);unclassified(100);                 |  |  |  |
| Otu129 | 0               | 0    | 2   |     | 1 Bacteria(100);Proteobacteria(100);Gammaproteobacteria(100);Xanthomonadales(100);Lysobacter(100);Silanomonas_lenta(100);unclassified(100);unclassified(100);unclassified(100);unclassified(100);unclassified(100);        |  |  |  |
| Otu130 | 0               | 0    | 3   |     | 0 Bacteria(100);WS3(100);Sediment-1(100);PRR-12(100);unclassified(100);unclassified(100);unclassified(100);unclassified(100);unclassified(100);unclassified(100);unclassified(100);unclassified(100);                      |  |  |  |
| Otu131 | 1               | 0    | 1   |     | 0 Bacteria(100);Firmicutes(100);Clostridia(100);Clostridiales(100);adhufec52(100);unclassified(100);unclassified(100);unclassified(100);unclassified(100);unclassified(100);unclassified(100);unclassified(100);           |  |  |  |
| Otu132 | 0               | 1    | 2   |     | 0 Bacteria(100);Verrucomicrobia(100);Opitutae(100);Fucophilus(100);unclassified(100);unclassified(100);unclassified(100);unclassified(100);unclassified(100);unclassified(100);unclassified(100);                          |  |  |  |

| OTU    | Number of reads |      |     |     | Greengenes taxonomic classification                                                                                                                                                                                                                                                                                                                                                                                                                                                                                                                                                                                                                                                                                                                                                                                                                                                                                                                                                                                                                                                                                                                                                                                                                                                                                                                                                                                                                                                                                                                                                                                                                                                                                                                                                                                                                                                                                                                                                                                                                                                                                                                                                                                                                                                                                                                                                                                                                                                                                                                                                                                                                                                                                                                                                                                                                                                                                                                                                                                                                                                                                                                                                                                                                                                                                                                                                                                                                                                                                                                                                                                                                                                                                                                                                                                                                                                                                                                                                                                                                                                                                                                                                                                                                                                                                                                                                                                                                                                                                                                                                                                                                                                                                                                                                                                                                                                                                                                                                                                                                                                                                                                                                                                                                                                                                                                                                                                                                                                                                                                                                                                                                                                                                                                                                                                                                                                                                                                                                                                                                                                                                                                                                                                                                                                                                                                                                                                                                                                                                                                                                                                                                                           |  |  |  |  |
|--------|-----------------|------|-----|-----|-------------------------------------------------------------------------------------------------------------------------------------------------------------------------------------------------------------------------------------------------------------------------------------------------------------------------------------------------------------------------------------------------------------------------------------------------------------------------------------------------------------------------------------------------------------------------------------------------------------------------------------------------------------------------------------------------------------------------------------------------------------------------------------------------------------------------------------------------------------------------------------------------------------------------------------------------------------------------------------------------------------------------------------------------------------------------------------------------------------------------------------------------------------------------------------------------------------------------------------------------------------------------------------------------------------------------------------------------------------------------------------------------------------------------------------------------------------------------------------------------------------------------------------------------------------------------------------------------------------------------------------------------------------------------------------------------------------------------------------------------------------------------------------------------------------------------------------------------------------------------------------------------------------------------------------------------------------------------------------------------------------------------------------------------------------------------------------------------------------------------------------------------------------------------------------------------------------------------------------------------------------------------------------------------------------------------------------------------------------------------------------------------------------------------------------------------------------------------------------------------------------------------------------------------------------------------------------------------------------------------------------------------------------------------------------------------------------------------------------------------------------------------------------------------------------------------------------------------------------------------------------------------------------------------------------------------------------------------------------------------------------------------------------------------------------------------------------------------------------------------------------------------------------------------------------------------------------------------------------------------------------------------------------------------------------------------------------------------------------------------------------------------------------------------------------------------------------------------------------------------------------------------------------------------------------------------------------------------------------------------------------------------------------------------------------------------------------------------------------------------------------------------------------------------------------------------------------------------------------------------------------------------------------------------------------------------------------------------------------------------------------------------------------------------------------------------------------------------------------------------------------------------------------------------------------------------------------------------------------------------------------------------------------------------------------------------------------------------------------------------------------------------------------------------------------------------------------------------------------------------------------------------------------------------------------------------------------------------------------------------------------------------------------------------------------------------------------------------------------------------------------------------------------------------------------------------------------------------------------------------------------------------------------------------------------------------------------------------------------------------------------------------------------------------------------------------------------------------------------------------------------------------------------------------------------------------------------------------------------------------------------------------------------------------------------------------------------------------------------------------------------------------------------------------------------------------------------------------------------------------------------------------------------------------------------------------------------------------------------------------------------------------------------------------------------------------------------------------------------------------------------------------------------------------------------------------------------------------------------------------------------------------------------------------------------------------------------------------------------------------------------------------------------------------------------------------------------------------------------------------------------------------------------------------------------------------------------------------------------------------------------------------------------------------------------------------------------------------------------------------------------------------------------------------------------------------------------------------------------------------------------------------------------------------------------------------------------------------------------------------------------------------------------------------------|--|--|--|--|
|        | Wol-            | Wol+ | DAM | WAL |                                                                                                                                                                                                                                                                                                                                                                                                                                                                                                                                                                                                                                                                                                                                                                                                                                                                                                                                                                                                                                                                                                                                                                                                                                                                                                                                                                                                                                                                                                                                                                                                                                                                                                                                                                                                                                                                                                                                                                                                                                                                                                                                                                                                                                                                                                                                                                                                                                                                                                                                                                                                                                                                                                                                                                                                                                                                                                                                                                                                                                                                                                                                                                                                                                                                                                                                                                                                                                                                                                                                                                                                                                                                                                                                                                                                                                                                                                                                                                                                                                                                                                                                                                                                                                                                                                                                                                                                                                                                                                                                                                                                                                                                                                                                                                                                                                                                                                                                                                                                                                                                                                                                                                                                                                                                                                                                                                                                                                                                                                                                                                                                                                                                                                                                                                                                                                                                                                                                                                                                                                                                                                                                                                                                                                                                                                                                                                                                                                                                                                                                                                                                                                                                               |  |  |  |  |
| Otu133 | 0               | 1    | 2   |     | 1 Bacteria(100);Chlamydiae(100);Parachlamydiaceae(100);unclassified(100);unclassified(100);unclassified(100);unclassified(100);unclassified(100);unclassified(100);unclassified(100);unclassified(100);                                                                                                                                                                                                                                                                                                                                                                                                                                                                                                                                                                                                                                                                                                                                                                                                                                                                                                                                                                                                                                                                                                                                                                                                                                                                                                                                                                                                                                                                                                                                                                                                                                                                                                                                                                                                                                                                                                                                                                                                                                                                                                                                                                                                                                                                                                                                                                                                                                                                                                                                                                                                                                                                                                                                                                                                                                                                                                                                                                                                                                                                                                                                                                                                                                                                                                                                                                                                                                                                                                                                                                                                                                                                                                                                                                                                                                                                                                                                                                                                                                                                                                                                                                                                                                                                                                                                                                                                                                                                                                                                                                                                                                                                                                                                                                                                                                                                                                                                                                                                                                                                                                                                                                                                                                                                                                                                                                                                                                                                                                                                                                                                                                                                                                                                                                                                                                                                                                                                                                                                                                                                                                                                                                                                                                                                                                                                                                                                                                                                       |  |  |  |  |
| Otu134 | 1               | 2    | 0   |     | 2 Bacteria(100);Bacteroidetes(100);Bacteroidales(100);Bacteroidaceae(100);B_ ovatus(100);unclassified(100);unclassified(100);unclassified(100);unclassified(100);unclassified(100);unclassified(100);                                                                                                                                                                                                                                                                                                                                                                                                                                                                                                                                                                                                                                                                                                                                                                                                                                                                                                                                                                                                                                                                                                                                                                                                                                                                                                                                                                                                                                                                                                                                                                                                                                                                                                                                                                                                                                                                                                                                                                                                                                                                                                                                                                                                                                                                                                                                                                                                                                                                                                                                                                                                                                                                                                                                                                                                                                                                                                                                                                                                                                                                                                                                                                                                                                                                                                                                                                                                                                                                                                                                                                                                                                                                                                                                                                                                                                                                                                                                                                                                                                                                                                                                                                                                                                                                                                                                                                                                                                                                                                                                                                                                                                                                                                                                                                                                                                                                                                                                                                                                                                                                                                                                                                                                                                                                                                                                                                                                                                                                                                                                                                                                                                                                                                                                                                                                                                                                                                                                                                                                                                                                                                                                                                                                                                                                                                                                                                                                                                                                         |  |  |  |  |
| Otu135 | 0               | 0    | 3   |     | 0 Bacteria(100);Bacteroidetes(100);Bacteroidales(100);adhufec77-25(100);Barnesiella(100);Barnesiella_viscericola(100);unclassified(100);unclassified(100);unclassified(100);unclassified(100);unclassified(100);                                                                                                                                                                                                                                                                                                                                                                                                                                                                                                                                                                                                                                                                                                                                                                                                                                                                                                                                                                                                                                                                                                                                                                                                                                                                                                                                                                                                                                                                                                                                                                                                                                                                                                                                                                                                                                                                                                                                                                                                                                                                                                                                                                                                                                                                                                                                                                                                                                                                                                                                                                                                                                                                                                                                                                                                                                                                                                                                                                                                                                                                                                                                                                                                                                                                                                                                                                                                                                                                                                                                                                                                                                                                                                                                                                                                                                                                                                                                                                                                                                                                                                                                                                                                                                                                                                                                                                                                                                                                                                                                                                                                                                                                                                                                                                                                                                                                                                                                                                                                                                                                                                                                                                                                                                                                                                                                                                                                                                                                                                                                                                                                                                                                                                                                                                                                                                                                                                                                                                                                                                                                                                                                                                                                                                                                                                                                                                                                                                                              |  |  |  |  |
| Otu136 | 0               | 0    | 0   |     | 2 Bacteria(100);OP10(100);SIA-22(100);unclassified(100);unclassified(100);unclassified(100);unclassified(100);unclassified(100);unclassified(100);unclassified(100);unclassified(100);                                                                                                                                                                                                                                                                                                                                                                                                                                                                                                                                                                                                                                                                                                                                                                                                                                                                                                                                                                                                                                                                                                                                                                                                                                                                                                                                                                                                                                                                                                                                                                                                                                                                                                                                                                                                                                                                                                                                                                                                                                                                                                                                                                                                                                                                                                                                                                                                                                                                                                                                                                                                                                                                                                                                                                                                                                                                                                                                                                                                                                                                                                                                                                                                                                                                                                                                                                                                                                                                                                                                                                                                                                                                                                                                                                                                                                                                                                                                                                                                                                                                                                                                                                                                                                                                                                                                                                                                                                                                                                                                                                                                                                                                                                                                                                                                                                                                                                                                                                                                                                                                                                                                                                                                                                                                                                                                                                                                                                                                                                                                                                                                                                                                                                                                                                                                                                                                                                                                                                                                                                                                                                                                                                                                                                                                                                                                                                                                                                                                                        |  |  |  |  |
| Otu137 | 0               | 0    | 33  |     | 0 Bacteria(100);Proteobacteria(100);Gammaproteobacteria(100);Piscirickettsiaceae(100);Thiobacillus_barengensis(100);M5149BH1062003_5(100);unclassified(100);unclassified(100);unclassified(100);unclassified(100);unclassified(100);                                                                                                                                                                                                                                                                                                                                                                                                                                                                                                                                                                                                                                                                                                                                                                                                                                                                                                                                                                                                                                                                                                                                                                                                                                                                                                                                                                                                                                                                                                                                                                                                                                                                                                                                                                                                                                                                                                                                                                                                                                                                                                                                                                                                                                                                                                                                                                                                                                                                                                                                                                                                                                                                                                                                                                                                                                                                                                                                                                                                                                                                                                                                                                                                                                                                                                                                                                                                                                                                                                                                                                                                                                                                                                                                                                                                                                                                                                                                                                                                                                                                                                                                                                                                                                                                                                                                                                                                                                                                                                                                                                                                                                                                                                                                                                                                                                                                                                                                                                                                                                                                                                                                                                                                                                                                                                                                                                                                                                                                                                                                                                                                                                                                                                                                                                                                                                                                                                                                                                                                                                                                                                                                                                                                                                                                                                                                                                                                                                          |  |  |  |  |
| Otu138 | 0               | 0    | 34  |     | 0 Bacteria(100);Firmicutes(100);Clostridia(100);Peptostreptococcaceae(100);Mogibacterium(100);CK047(100);p-648-a5(100);unclassified(100);unclassified(100);unclassified(100);unclassified(100);unclassified(100);                                                                                                                                                                                                                                                                                                                                                                                                                                                                                                                                                                                                                                                                                                                                                                                                                                                                                                                                                                                                                                                                                                                                                                                                                                                                                                                                                                                                                                                                                                                                                                                                                                                                                                                                                                                                                                                                                                                                                                                                                                                                                                                                                                                                                                                                                                                                                                                                                                                                                                                                                                                                                                                                                                                                                                                                                                                                                                                                                                                                                                                                                                                                                                                                                                                                                                                                                                                                                                                                                                                                                                                                                                                                                                                                                                                                                                                                                                                                                                                                                                                                                                                                                                                                                                                                                                                                                                                                                                                                                                                                                                                                                                                                                                                                                                                                                                                                                                                                                                                                                                                                                                                                                                                                                                                                                                                                                                                                                                                                                                                                                                                                                                                                                                                                                                                                                                                                                                                                                                                                                                                                                                                                                                                                                                                                                                                                                                                                                                                             |  |  |  |  |
| Otu139 | 0               | 0    | 1   |     | 1 Bacteria(100);Firmicutes(100);Clostridia(100);Clostridiales(100);Clostridiaceae(100);pDH-A(100);unclassified(100);unclassified(100);unclassified(100);unclassified(100);unclassified(100);unclassified(100);                                                                                                                                                                                                                                                                                                                                                                                                                                                                                                                                                                                                                                                                                                                                                                                                                                                                                                                                                                                                                                                                                                                                                                                                                                                                                                                                                                                                                                                                                                                                                                                                                                                                                                                                                                                                                                                                                                                                                                                                                                                                                                                                                                                                                                                                                                                                                                                                                                                                                                                                                                                                                                                                                                                                                                                                                                                                                                                                                                                                                                                                                                                                                                                                                                                                                                                                                                                                                                                                                                                                                                                                                                                                                                                                                                                                                                                                                                                                                                                                                                                                                                                                                                                                                                                                                                                                                                                                                                                                                                                                                                                                                                                                                                                                                                                                                                                                                                                                                                                                                                                                                                                                                                                                                                                                                                                                                                                                                                                                                                                                                                                                                                                                                                                                                                                                                                                                                                                                                                                                                                                                                                                                                                                                                                                                                                                                                                                                                                                                |  |  |  |  |
| Otu140 | 0               | 0    | 5   |     | 0 Bacteria(100);Proteobacteria(100);Gammaproteobacteria(100);Enterobacteriales_Enterobacteriaceae(100);Yersinia(100);unclassified(100);unclassified(100);unclassified(100);unclassified(100);unclassified(100);unclassified(100);                                                                                                                                                                                                                                                                                                                                                                                                                                                                                                                                                                                                                                                                                                                                                                                                                                                                                                                                                                                                                                                                                                                                                                                                                                                                                                                                                                                                                                                                                                                                                                                                                                                                                                                                                                                                                                                                                                                                                                                                                                                                                                                                                                                                                                                                                                                                                                                                                                                                                                                                                                                                                                                                                                                                                                                                                                                                                                                                                                                                                                                                                                                                                                                                                                                                                                                                                                                                                                                                                                                                                                                                                                                                                                                                                                                                                                                                                                                                                                                                                                                                                                                                                                                                                                                                                                                                                                                                                                                                                                                                                                                                                                                                                                                                                                                                                                                                                                                                                                                                                                                                                                                                                                                                                                                                                                                                                                                                                                                                                                                                                                                                                                                                                                                                                                                                                                                                                                                                                                                                                                                                                                                                                                                                                                                                                                                                                                                                                                             |  |  |  |  |
| Otu141 | 14              | 33   | 0   |     | 21 Bacteria(100);Firmicutes(100);Bacilli(100);Lactobacillales(100);Leuconostoc(100);Oenococcus(100);unclassified(100);unclassified(100);unclassified(100);unclassified(100);unclassified(100);unclassified(100);                                                                                                                                                                                                                                                                                                                                                                                                                                                                                                                                                                                                                                                                                                                                                                                                                                                                                                                                                                                                                                                                                                                                                                                                                                                                                                                                                                                                                                                                                                                                                                                                                                                                                                                                                                                                                                                                                                                                                                                                                                                                                                                                                                                                                                                                                                                                                                                                                                                                                                                                                                                                                                                                                                                                                                                                                                                                                                                                                                                                                                                                                                                                                                                                                                                                                                                                                                                                                                                                                                                                                                                                                                                                                                                                                                                                                                                                                                                                                                                                                                                                                                                                                                                                                                                                                                                                                                                                                                                                                                                                                                                                                                                                                                                                                                                                                                                                                                                                                                                                                                                                                                                                                                                                                                                                                                                                                                                                                                                                                                                                                                                                                                                                                                                                                                                                                                                                                                                                                                                                                                                                                                                                                                                                                                                                                                                                                                                                                                                              |  |  |  |  |
| Otu142 | 0               | 1    | 0   |     | 3 Bacteria(100);Firmicutes(100);Clostridia(100);Clostridiales(100);Z623(100);unclassified(100);unclassified(100);unclassified(100);unclassified(100);unclassified(100);unclassified(100);                                                                                                                                                                                                                                                                                                                                                                                                                                                                                                                                                                                                                                                                                                                                                                                                                                                                                                                                                                                                                                                                                                                                                                                                                                                                                                                                                                                                                                                                                                                                                                                                                                                                                                                                                                                                                                                                                                                                                                                                                                                                                                                                                                                                                                                                                                                                                                                                                                                                                                                                                                                                                                                                                                                                                                                                                                                                                                                                                                                                                                                                                                                                                                                                                                                                                                                                                                                                                                                                                                                                                                                                                                                                                                                                                                                                                                                                                                                                                                                                                                                                                                                                                                                                                                                                                                                                                                                                                                                                                                                                                                                                                                                                                                                                                                                                                                                                                                                                                                                                                                                                                                                                                                                                                                                                                                                                                                                                                                                                                                                                                                                                                                                                                                                                                                                                                                                                                                                                                                                                                                                                                                                                                                                                                                                                                                                                                                                                                                                                                     |  |  |  |  |
| Otu143 | 2               | 1    | 0   |     | 2 Bacteria(100);Firmicutes(100);Clostridia(100);Eubacteriaceae(100);Unclassified(100);unclassified(100);unclassified(100);unclassified(100);unclassified(100);unclassified(100);unclassified(100);                                                                                                                                                                                                                                                                                                                                                                                                                                                                                                                                                                                                                                                                                                                                                                                                                                                                                                                                                                                                                                                                                                                                                                                                                                                                                                                                                                                                                                                                                                                                                                                                                                                                                                                                                                                                                                                                                                                                                                                                                                                                                                                                                                                                                                                                                                                                                                                                                                                                                                                                                                                                                                                                                                                                                                                                                                                                                                                                                                                                                                                                                                                                                                                                                                                                                                                                                                                                                                                                                                                                                                                                                                                                                                                                                                                                                                                                                                                                                                                                                                                                                                                                                                                                                                                                                                                                                                                                                                                                                                                                                                                                                                                                                                                                                                                                                                                                                                                                                                                                                                                                                                                                                                                                                                                                                                                                                                                                                                                                                                                                                                                                                                                                                                                                                                                                                                                                                                                                                                                                                                                                                                                                                                                                                                                                                                                                                                                                                                                                            |  |  |  |  |
| Otu144 | 1               | 1    | 0   |     | 0 Bacteria(100);Chloroflexi(100);Chloroflexales(100);Chloroflexaceae(100);Chloroflexaceae(100);unclassified(100);unclassified(100);unclassified(100);unclassified(100);unclassified(100);unclassified(100);                                                                                                                                                                                                                                                                                                                                                                                                                                                                                                                                                                                                                                                                                                                                                                                                                                                                                                                                                                                                                                                                                                                                                                                                                                                                                                                                                                                                                                                                                                                                                                                                                                                                                                                                                                                                                                                                                                                                                                                                                                                                                                                                                                                                                                                                                                                                                                                                                                                                                                                                                                                                                                                                                                                                                                                                                                                                                                                                                                                                                                                                                                                                                                                                                                                                                                                                                                                                                                                                                                                                                                                                                                                                                                                                                                                                                                                                                                                                                                                                                                                                                                                                                                                                                                                                                                                                                                                                                                                                                                                                                                                                                                                                                                                                                                                                                                                                                                                                                                                                                                                                                                                                                                                                                                                                                                                                                                                                                                                                                                                                                                                                                                                                                                                                                                                                                                                                                                                                                                                                                                                                                                                                                                                                                                                                                                                                                                                                                                                                   |  |  |  |  |
| Otu145 | 0               | 0    | 1   |     | 0 Bacteria(100);Firmicutes(100);Bacilli(100);Lactobacillales(100);Lactobacillaceae(100);Lactobacillus_ruminis(100);unclassified(100);unclassified(100);unclassified(100);unclassified(100);unclassified(100);unclassified(100);                                                                                                                                                                                                                                                                                                                                                                                                                                                                                                                                                                                                                                                                                                                                                                                                                                                                                                                                                                                                                                                                                                                                                                                                                                                                                                                                                                                                                                                                                                                                                                                                                                                                                                                                                                                                                                                                                                                                                                                                                                                                                                                                                                                                                                                                                                                                                                                                                                                                                                                                                                                                                                                                                                                                                                                                                                                                                                                                                                                                                                                                                                                                                                                                                                                                                                                                                                                                                                                                                                                                                                                                                                                                                                                                                                                                                                                                                                                                                                                                                                                                                                                                                                                                                                                                                                                                                                                                                                                                                                                                                                                                                                                                                                                                                                                                                                                                                                                                                                                                                                                                                                                                                                                                                                                                                                                                                                                                                                                                                                                                                                                                                                                                                                                                                                                                                                                                                                                                                                                                                                                                                                                                                                                                                                                                                                                                                                                                                                               |  |  |  |  |
| Otu146 | 0               | 0    | 0   |     | 1 Bacteria(100);Chloroflexi(100);TK17(100);unclassified(100);unclassified(100);unclassified(100);unclassified(100);unclassified(100);unclassified(100);unclassified(100);unclassified(100);                                                                                                                                                                                                                                                                                                                                                                                                                                                                                                                                                                                                                                                                                                                                                                                                                                                                                                                                                                                                                                                                                                                                                                                                                                                                                                                                                                                                                                                                                                                                                                                                                                                                                                                                                                                                                                                                                                                                                                                                                                                                                                                                                                                                                                                                                                                                                                                                                                                                                                                                                                                                                                                                                                                                                                                                                                                                                                                                                                                                                                                                                                                                                                                                                                                                                                                                                                                                                                                                                                                                                                                                                                                                                                                                                                                                                                                                                                                                                                                                                                                                                                                                                                                                                                                                                                                                                                                                                                                                                                                                                                                                                                                                                                                                                                                                                                                                                                                                                                                                                                                                                                                                                                                                                                                                                                                                                                                                                                                                                                                                                                                                                                                                                                                                                                                                                                                                                                                                                                                                                                                                                                                                                                                                                                                                                                                                                                                                                                                                                   |  |  |  |  |
| Otu147 | 4               | 0    | 6   |     | 4 Bacteria(100);Proteobacteria(100);Alphaproteobacteria(100);Consistiales(100);Unclassified(100);unclassified(100);unclassified(100);unclassified(100);unclassified(100);unclassified(100);unclassified(100);                                                                                                                                                                                                                                                                                                                                                                                                                                                                                                                                                                                                                                                                                                                                                                                                                                                                                                                                                                                                                                                                                                                                                                                                                                                                                                                                                                                                                                                                                                                                                                                                                                                                                                                                                                                                                                                                                                                                                                                                                                                                                                                                                                                                                                                                                                                                                                                                                                                                                                                                                                                                                                                                                                                                                                                                                                                                                                                                                                                                                                                                                                                                                                                                                                                                                                                                                                                                                                                                                                                                                                                                                                                                                                                                                                                                                                                                                                                                                                                                                                                                                                                                                                                                                                                                                                                                                                                                                                                                                                                                                                                                                                                                                                                                                                                                                                                                                                                                                                                                                                                                                                                                                                                                                                                                                                                                                                                                                                                                                                                                                                                                                                                                                                                                                                                                                                                                                                                                                                                                                                                                                                                                                                                                                                                                                                                                                                                                                                                                 |  |  |  |  |
| Otu148 | 3               | 0    | 2   |     | 2 Bacteria(100);Firmicutes(100);Clostridia(100);Clostridiales(100);B360(100);unclassified(100);unclassified(100);unclassified(100);unclassified(100);unclassified(100);unclassified(100);unclassified(100);                                                                                                                                                                                                                                                                                                                                                                                                                                                                                                                                                                                                                                                                                                                                                                                                                                                                                                                                                                                                                                                                                                                                                                                                                                                                                                                                                                                                                                                                                                                                                                                                                                                                                                                                                                                                                                                                                                                                                                                                                                                                                                                                                                                                                                                                                                                                                                                                                                                                                                                                                                                                                                                                                                                                                                                                                                                                                                                                                                                                                                                                                                                                                                                                                                                                                                                                                                                                                                                                                                                                                                                                                                                                                                                                                                                                                                                                                                                                                                                                                                                                                                                                                                                                                                                                                                                                                                                                                                                                                                                                                                                                                                                                                                                                                                                                                                                                                                                                                                                                                                                                                                                                                                                                                                                                                                                                                                                                                                                                                                                                                                                                                                                                                                                                                                                                                                                                                                                                                                                                                                                                                                                                                                                                                                                                                                                                                                                                                                                                   |  |  |  |  |
| Otu149 | 0               | 0    | 4   |     | 0 Bacteria(100);Firmicutes(100);Clostridia(100);Clostridiales(100);C21_k11(100);unclassified(100);unclassified(100);unclassified(100);unclassified(100);unclassified(100);unclassified(100);unclassified(100);                                                                                                                                                                                                                                                                                                                                                                                                                                                                                                                                                                                                                                                                                                                                                                                                                                                                                                                                                                                                                                                                                                                                                                                                                                                                                                                                                                                                                                                                                                                                                                                                                                                                                                                                                                                                                                                                                                                                                                                                                                                                                                                                                                                                                                                                                                                                                                                                                                                                                                                                                                                                                                                                                                                                                                                                                                                                                                                                                                                                                                                                                                                                                                                                                                                                                                                                                                                                                                                                                                                                                                                                                                                                                                                                                                                                                                                                                                                                                                                                                                                                                                                                                                                                                                                                                                                                                                                                                                                                                                                                                                                                                                                                                                                                                                                                                                                                                                                                                                                                                                                                                                                                                                                                                                                                                                                                                                                                                                                                                                                                                                                                                                                                                                                                                                                                                                                                                                                                                                                                                                                                                                                                                                                                                                                                                                                                                                                                                                                                |  |  |  |  |
| Otu150 | 0               | 0    | 1   |     | 0 Bacteria(100);Proteobacteria(100);Alphaproteobacteria(100);NAC1-6(100);unclassified(100);unclassified(100);unclassified(100);unclassified(100);unclassified(100);unclassified(100);unclassified(100);unclassified(100);                                                                                                                                                                                                                                                                                                                                                                                                                                                                                                                                                                                                                                                                                                                                                                                                                                                                                                                                                                                                                                                                                                                                                                                                                                                                                                                                                                                                                                                                                                                                                                                                                                                                                                                                                                                                                                                                                                                                                                                                                                                                                                                                                                                                                                                                                                                                                                                                                                                                                                                                                                                                                                                                                                                                                                                                                                                                                                                                                                                                                                                                                                                                                                                                                                                                                                                                                                                                                                                                                                                                                                                                                                                                                                                                                                                                                                                                                                                                                                                                                                                                                                                                                                                                                                                                                                                                                                                                                                                                                                                                                                                                                                                                                                                                                                                                                                                                                                                                                                                                                                                                                                                                                                                                                                                                                                                                                                                                                                                                                                                                                                                                                                                                                                                                                                                                                                                                                                                                                                                                                                                                                                                                                                                                                                                                                                                                                                                                                                                     |  |  |  |  |
| Otu151 | 4               | 0    | 6   |     | 6 Bacteria(100);Acidobacteria(100);Solibacteres(100);Solibacteraceae(100);WD205(100);unclassified(100);unclassified(100);unclassified(100);unclassified(100);unclassified(100);unclassified(100);unclassified(100);                                                                                                                                                                                                                                                                                                                                                                                                                                                                                                                                                                                                                                                                                                                                                                                                                                                                                                                                                                                                                                                                                                                                                                                                                                                                                                                                                                                                                                                                                                                                                                                                                                                                                                                                                                                                                                                                                                                                                                                                                                                                                                                                                                                                                                                                                                                                                                                                                                                                                                                                                                                                                                                                                                                                                                                                                                                                                                                                                                                                                                                                                                                                                                                                                                                                                                                                                                                                                                                                                                                                                                                                                                                                                                                                                                                                                                                                                                                                                                                                                                                                                                                                                                                                                                                                                                                                                                                                                                                                                                                                                                                                                                                                                                                                                                                                                                                                                                                                                                                                                                                                                                                                                                                                                                                                                                                                                                                                                                                                                                                                                                                                                                                                                                                                                                                                                                                                                                                                                                                                                                                                                                                                                                                                                                                                                                                                                                                                                                                           |  |  |  |  |
| Otu152 | 3               | 6    | 0   |     | 2 Bacteria(100);Firmicutes(100);Symbiobacteria(100);OPB54(100);BSV81(100);unclassified(100);unclassified(100);unclassified(100);unclassified(100);unclassified(100);unclassified(100);unclassified(100);                                                                                                                                                                                                                                                                                                                                                                                                                                                                                                                                                                                                                                                                                                                                                                                                                                                                                                                                                                                                                                                                                                                                                                                                                                                                                                                                                                                                                                                                                                                                                                                                                                                                                                                                                                                                                                                                                                                                                                                                                                                                                                                                                                                                                                                                                                                                                                                                                                                                                                                                                                                                                                                                                                                                                                                                                                                                                                                                                                                                                                                                                                                                                                                                                                                                                                                                                                                                                                                                                                                                                                                                                                                                                                                                                                                                                                                                                                                                                                                                                                                                                                                                                                                                                                                                                                                                                                                                                                                                                                                                                                                                                                                                                                                                                                                                                                                                                                                                                                                                                                                                                                                                                                                                                                                                                                                                                                                                                                                                                                                                                                                                                                                                                                                                                                                                                                                                                                                                                                                                                                                                                                                                                                                                                                                                                                                                                                                                                                                                      |  |  |  |  |
| Otu153 | 0               | 1    | 0   |     | 0 Bacteria(100);Firmicutes(100);Clostridia(100);Clostridiales(100);Johnsonella(100);Eubacterium_cf_saburreum_oral_strain_C27KA(100);Unclassified(100);unclassified(100);unclassified(100);unclassified(100);unclassified(100);unclassified(100);                                                                                                                                                                                                                                                                                                                                                                                                                                                                                                                                                                                                                                                                                                                                                                                                                                                                                                                                                                                                                                                                                                                                                                                                                                                                                                                                                                                                                                                                                                                                                                                                                                                                                                                                                                                                                                                                                                                                                                                                                                                                                                                                                                                                                                                                                                                                                                                                                                                                                                                                                                                                                                                                                                                                                                                                                                                                                                                                                                                                                                                                                                                                                                                                                                                                                                                                                                                                                                                                                                                                                                                                                                                                                                                                                                                                                                                                                                                                                                                                                                                                                                                                                                                                                                                                                                                                                                                                                                                                                                                                                                                                                                                                                                                                                                                                                                                                                                                                                                                                                                                                                                                                                                                                                                                                                                                                                                                                                                                                                                                                                                                                                                                                                                                                                                                                                                                                                                                                                                                                                                                                                                                                                                                                                                                                                                                                                                                                                              |  |  |  |  |
| Otu154 | 1               | 5    | 0   |     | 3 Bacteria(100);Chloroflexi(100);Dehalococcoidetes(100);GIF9(100);MB-A2-101(100);unclassified(100);unclassified(100);unclassified(100);unclassified(100);unclassified(100);unclassified(100);unclassified(100);                                                                                                                                                                                                                                                                                                                                                                                                                                                                                                                                                                                                                                                                                                                                                                                                                                                                                                                                                                                                                                                                                                                                                                                                                                                                                                                                                                                                                                                                                                                                                                                                                                                                                                                                                                                                                                                                                                                                                                                                                                                                                                                                                                                                                                                                                                                                                                                                                                                                                                                                                                                                                                                                                                                                                                                                                                                                                                                                                                                                                                                                                                                                                                                                                                                                                                                                                                                                                                                                                                                                                                                                                                                                                                                                                                                                                                                                                                                                                                                                                                                                                                                                                                                                                                                                                                                                                                                                                                                                                                                                                                                                                                                                                                                                                                                                                                                                                                                                                                                                                                                                                                                                                                                                                                                                                                                                                                                                                                                                                                                                                                                                                                                                                                                                                                                                                                                                                                                                                                                                                                                                                                                                                                                                                                                                                                                                                                                                                                                               |  |  |  |  |
| Otu155 | 0               | 0    | 7   |     | 0 Bacteria(100);WS3(100);Sediment_1(100);Unclassified(100);unclassified(100);unclassified(100);unclassified(100);unclassified(100);unclassified(100);unclassified(100);unclassified(100);unclassified(100);                                                                                                                                                                                                                                                                                                                                                                                                                                                                                                                                                                                                                                                                                                                                                                                                                                                                                                                                                                                                                                                                                                                                                                                                                                                                                                                                                                                                                                                                                                                                                                                                                                                                                                                                                                                                                                                                                                                                                                                                                                                                                                                                                                                                                                                                                                                                                                                                                                                                                                                                                                                                                                                                                                                                                                                                                                                                                                                                                                                                                                                                                                                                                                                                                                                                                                                                                                                                                                                                                                                                                                                                                                                                                                                                                                                                                                                                                                                                                                                                                                                                                                                                                                                                                                                                                                                                                                                                                                                                                                                                                                                                                                                                                                                                                                                                                                                                                                                                                                                                                                                                                                                                                                                                                                                                                                                                                                                                                                                                                                                                                                                                                                                                                                                                                                                                                                                                                                                                                                                                                                                                                                                                                                                                                                                                                                                                                                                                                                                                   |  |  |  |  |
| Otu156 | 0               | 0    | 3   |     | 0 Bacteria(100);Firmicutes(100);Clostridia(100);Clostridiales(100);RF30(100);RF6(100);M366(100);unclassified(100);unclassified(100);unclassified(100);unclassified(100);unclassified(100);unclassified(100);unclassified(100);                                                                                                                                                                                                                                                                                                                                                                                                                                                                                                                                                                                                                                                                                                                                                                                                                                                                                                                                                                                                                                                                                                                                                                                                                                                                                                                                                                                                                                                                                                                                                                                                                                                                                                                                                                                                                                                                                                                                                                                                                                                                                                                                                                                                                                                                                                                                                                                                                                                                                                                                                                                                                                                                                                                                                                                                                                                                                                                                                                                                                                                                                                                                                                                                                                                                                                                                                                                                                                                                                                                                                                                                                                                                                                                                                                                                                                                                                                                                                                                                                                                                                                                                                                                                                                                                                                                                                                                                                                                                                                                                                                                                                                                                                                                                                                                                                                                                                                                                                                                                                                                                                                                                                                                                                                                                                                                                                                                                                                                                                                                                                                                                                                                                                                                                                                                                                                                                                                                                                                                                                                                                                                                                                                                                                                                                                                                                                                                                                                                |  |  |  |  |
| Otu157 | 2               | 0    | 0   |     | 0 Bacteria(100);Spirochaetes(100);Treponemaceae(100);Treponema(100);Rs-D01(100);unclassified(100);unclassified(100);unclassified(100);unclassified(100);unclassified(100);unclassified(100);unclassified(100);                                                                                                                                                                                                                                                                                                                                                                                                                                                                                                                                                                                                                                                                                                                                                                                                                                                                                                                                                                                                                                                                                                                                                                                                                                                                                                                                                                                                                                                                                                                                                                                                                                                                                                                                                                                                                                                                                                                                                                                                                                                                                                                                                                                                                                                                                                                                                                                                                                                                                                                                                                                                                                                                                                                                                                                                                                                                                                                                                                                                                                                                                                                                                                                                                                                                                                                                                                                                                                                                                                                                                                                                                                                                                                                                                                                                                                                                                                                                                                                                                                                                                                                                                                                                                                                                                                                                                                                                                                                                                                                                                                                                                                                                                                                                                                                                                                                                                                                                                                                                                                                                                                                                                                                                                                                                                                                                                                                                                                                                                                                                                                                                                                                                                                                                                                                                                                                                                                                                                                                                                                                                                                                                                                                                                                                                                                                                                                                                                                                                |  |  |  |  |
| Otu158 | 0               | 1    | 1   |     | 1 Bacteria(100);Firmicutes(100);Clostridia(100);Unclassified(100);unclassified(100);unclassified(100);unclassified(100);unclassified(100);unclassified(100);unclassified(100);unclassified(100);unclassified(100);                                                                                                                                                                                                                                                                                                                                                                                                                                                                                                                                                                                                                                                                                                                                                                                                                                                                                                                                                                                                                                                                                                                                                                                                                                                                                                                                                                                                                                                                                                                                                                                                                                                                                                                                                                                                                                                                                                                                                                                                                                                                                                                                                                                                                                                                                                                                                                                                                                                                                                                                                                                                                                                                                                                                                                                                                                                                                                                                                                                                                                                                                                                                                                                                                                                                                                                                                                                                                                                                                                                                                                                                                                                                                                                                                                                                                                                                                                                                                                                                                                                                                                                                                                                                                                                                                                                                                                                                                                                                                                                                                                                                                                                                                                                                                                                                                                                                                                                                                                                                                                                                                                                                                                                                                                                                                                                                                                                                                                                                                                                                                                                                                                                                                                                                                                                                                                                                                                                                                                                                                                                                                                                                                                                                                                                                                                                                                                                                                                                            |  |  |  |  |
| Otu159 | 0               | 1    | 0   |     | 0 Bacteria(100);OP8(100);OP8_2(100);unclassified(100);unclassified(100);unclassified(100);unclassified(100);unclassified(100);unclassified(100);unclassified(100);unclassified(100);unclassified(100);                                                                                                                                                                                                                                                                                                                                                                                                                                                                                                                                                                                                                                                                                                                                                                                                                                                                                                                                                                                                                                                                                                                                                                                                                                                                                                                                                                                                                                                                                                                                                                                                                                                                                                                                                                                                                                                                                                                                                                                                                                                                                                                                                                                                                                                                                                                                                                                                                                                                                                                                                                                                                                                                                                                                                                                                                                                                                                                                                                                                                                                                                                                                                                                                                                                                                                                                                                                                                                                                                                                                                                                                                                                                                                                                                                                                                                                                                                                                                                                                                                                                                                                                                                                                                                                                                                                                                                                                                                                                                                                                                                                                                                                                                                                                                                                                                                                                                                                                                                                                                                                                                                                                                                                                                                                                                                                                                                                                                                                                                                                                                                                                                                                                                                                                                                                                                                                                                                                                                                                                                                                                                                                                                                                                                                                                                                                                                                                                                                                                        |  |  |  |  |
| Otu160 | 0               | 1    | 1   |     | 0 Bacteria(100);Planctomycetes(100);Kueneniaceae(100);Unclassified(100);unclassified(100);unclassified(100);unclassified(100);unclassified(100);unclassified(100);unclassified(100);unclassified(100);unclassified(100);                                                                                                                                                                                                                                                                                                                                                                                                                                                                                                                                                                                                                                                                                                                                                                                                                                                                                                                                                                                                                                                                                                                                                                                                                                                                                                                                                                                                                                                                                                                                                                                                                                                                                                                                                                                                                                                                                                                                                                                                                                                                                                                                                                                                                                                                                                                                                                                                                                                                                                                                                                                                                                                                                                                                                                                                                                                                                                                                                                                                                                                                                                                                                                                                                                                                                                                                                                                                                                                                                                                                                                                                                                                                                                                                                                                                                                                                                                                                                                                                                                                                                                                                                                                                                                                                                                                                                                                                                                                                                                                                                                                                                                                                                                                                                                                                                                                                                                                                                                                                                                                                                                                                                                                                                                                                                                                                                                                                                                                                                                                                                                                                                                                                                                                                                                                                                                                                                                                                                                                                                                                                                                                                                                                                                                                                                                                                                                                                                                                      |  |  |  |  |
| Otu161 | 0               | 0    | 6   |     | 1 Bacteria(100);Proteobacteria(100);Gammaproteobacteria(100);Thiomicrospira(100);Thiomicrospiraceae(100);unclassified(100);unclassified(100);unclassified(100);unclassified(100);unclassified(100);unclassified(100);unclassified(100);unclassified(100);                                                                                                                                                                                                                                                                                                                                                                                                                                                                                                                                                                                                                                                                                                                                                                                                                                                                                                                                                                                                                                                                                                                                                                                                                                                                                                                                                                                                                                                                                                                                                                                                                                                                                                                                                                                                                                                                                                                                                                                                                                                                                                                                                                                                                                                                                                                                                                                                                                                                                                                                                                                                                                                                                                                                                                                                                                                                                                                                                                                                                                                                                                                                                                                                                                                                                                                                                                                                                                                                                                                                                                                                                                                                                                                                                                                                                                                                                                                                                                                                                                                                                                                                                                                                                                                                                                                                                                                                                                                                                                                                                                                                                                                                                                                                                                                                                                                                                                                                                                                                                                                                                                                                                                                                                                                                                                                                                                                                                                                                                                                                                                                                                                                                                                                                                                                                                                                                                                                                                                                                                                                                                                                                                                                                                                                                                                                                                                                                                     |  |  |  |  |
| Otu162 | 2               | 3    | 5   |     | 5 Bacteria(100);Bacteroidetes(100);Saprospirales(100);Saprospiraceae(100);Saprospira(100);Unclassified(100);unclassified(100);unclassified(100);unclassified(100);unclassified(100);unclassified(100);unclassified(100);unclassified(100);                                                                                                                                                                                                                                                                                                                                                                                                                                                                                                                                                                                                                                                                                                                                                                                                                                                                                                                                                                                                                                                                                                                                                                                                                                                                                                                                                                                                                                                                                                                                                                                                                                                                                                                                                                                                                                                                                                                                                                                                                                                                                                                                                                                                                                                                                                                                                                                                                                                                                                                                                                                                                                                                                                                                                                                                                                                                                                                                                                                                                                                                                                                                                                                                                                                                                                                                                                                                                                                                                                                                                                                                                                                                                                                                                                                                                                                                                                                                                                                                                                                                                                                                                                                                                                                                                                                                                                                                                                                                                                                                                                                                                                                                                                                                                                                                                                                                                                                                                                                                                                                                                                                                                                                                                                                                                                                                                                                                                                                                                                                                                                                                                                                                                                                                                                                                                                                                                                                                                                                                                                                                                                                                                                                                                                                                                                                                                                                                                                    |  |  |  |  |
| Otu163 | 0               | 0    | 19  |     | 1 Bacteria(100);Proteobacteria(100);Gammaproteobacteria(100);Thiomicrospira(100);Thiomicrospira_frisia(100);Thiomicrospira_chilensis(100);unclassified(100);unclassified(100);unclassified(100);unclassified(100);unclassified(100);unclassified(100);unclassified(100);unclassified(100);                                                                                                                                                                                                                                                                                                                                                                                                                                                                                                                                                                                                                                                                                                                                                                                                                                                                                                                                                                                                                                                                                                                                                                                                                                                                                                                                                                                                                                                                                                                                                                                                                                                                                                                                                                                                                                                                                                                                                                                                                                                                                                                                                                                                                                                                                                                                                                                                                                                                                                                                                                                                                                                                                                                                                                                                                                                                                                                                                                                                                                                                                                                                                                                                                                                                                                                                                                                                                                                                                                                                                                                                                                                                                                                                                                                                                                                                                                                                                                                                                                                                                                                                                                                                                                                                                                                                                                                                                                                                                                                                                                                                                                                                                                                                                                                                                                                                                                                                                                                                                                                                                                                                                                                                                                                                                                                                                                                                                                                                                                                                                                                                                                                                                                                                                                                                                                                                                                                                                                                                                                                                                                                                                                                                                                                                                                                                                                                    |  |  |  |  |
| Otu164 | 0               | 0    | 1   |     | 0 Bacteria(100);Proteobacteria(100);Alphaproteobacteria(100);Rhodobacterales(100);Rhodobacter(100);OM42(100);unclassified(100);unclassified(100);unclassified(100);unclassified(100);unclassified(100);unclassified(100);unclassified(100);                                                                                                                                                                                                                                                                                                                                                                                                                                                                                                                                                                                                                                                                                                                                                                                                                                                                                                                                                                                                                                                                                                                                                                                                                                                                                                                                                                                                                                                                                                                                                                                                                                                                                                                                                                                                                                                                                                                                                                                                                                                                                                                                                                                                                                                                                                                                                                                                                                                                                                                                                                                                                                                                                                                                                                                                                                                                                                                                                                                                                                                                                                                                                                                                                                                                                                                                                                                                                                                                                                                                                                                                                                                                                                                                                                                                                                                                                                                                                                                                                                                                                                                                                                                                                                                                                                                                                                                                                                                                                                                                                                                                                                                                                                                                                                                                                                                                                                                                                                                                                                                                                                                                                                                                                                                                                                                                                                                                                                                                                                                                                                                                                                                                                                                                                                                                                                                                                                                                                                                                                                                                                                                                                                                                                                                                                                                                                                                                                                   |  |  |  |  |
| Otu165 | 0               | 0    | 8   |     | 1 Bacteria(100);Bacteroidetes(100);SM1A07(100);unclassified(100);unclassified(100);unclassified(100);unclassified(100);unclassified(100);unclassified(100);unclassified(100);unclassified(100);unclassified(100);                                                                                                                                                                                                                                                                                                                                                                                                                                                                                                                                                                                                                                                                                                                                                                                                                                                                                                                                                                                                                                                                                                                                                                                                                                                                                                                                                                                                                                                                                                                                                                                                                                                                                                                                                                                                                                                                                                                                                                                                                                                                                                                                                                                                                                                                                                                                                                                                                                                                                                                                                                                                                                                                                                                                                                                                                                                                                                                                                                                                                                                                                                                                                                                                                                                                                                                                                                                                                                                                                                                                                                                                                                                                                                                                                                                                                                                                                                                                                                                                                                                                                                                                                                                                                                                                                                                                                                                                                                                                                                                                                                                                                                                                                                                                                                                                                                                                                                                                                                                                                                                                                                                                                                                                                                                                                                                                                                                                                                                                                                                                                                                                                                                                                                                                                                                                                                                                                                                                                                                                                                                                                                                                                                                                                                                                                                                                                                                                                                                             |  |  |  |  |
| Otu166 | 0               | 0    | 3   |     | 53 Bacteria(100);Acidobacteria(100);Chloracidobacteria(100);Ellin6075(100);unclassified(100);unclassified(100);unclassified(100);unclassified(100);unclassified(100);unclassified(100);unclassified(100);unclassified(100);unclassified(100);unclassified(100);unclassified(100);unclassified(100);unclassified(100);unclassified(100);unclassified(100);unclassified(100);unclassified(100);unclassified(100);unclassified(100);unclassified(100);unclassified(100);unclassified(100);unclassified(100);unclassified(100);unclassified(100);unclassified(100);unclassified(100);unclassified(100);unclassified(100);unclassified(100);unclassified(100);unclassified(100);unclassified(100);unclassified(100);unclassified(100);unclassified(100);unclassified(100);unclassified(100);unclassified(100);unclassified(100);unclassified(100);unclassified(100);unclassified(100);unclassified(100);unclassified(100);unclassified(100);unclassified(100);unclassified(100);unclassified(100);unclassified(100);unclassified(100);unclassified(100);unclassified(100);unclassified(100);unclassified(100);unclassified(100);unclassified(100);unclassified(100);unclassified(100);unclassified(100);unclassified(100);unclassified(100);unclassified(100);unclassified(100);unclassified(100);unclassified(100);unclassified(100);unclassified(100);unclassified(100);unclassified(100);unclassified(100);unclassified(100);unclassified(100);unclassified(100);unclassified(100);unclassified(100);unclassified(100);unclassified(100);unclassified(100);unclassified(100);unclassified(100);unclassified(100);unclassified(100);unclassified(100);unclassified(100);unclassified(100);unclassified(100);unclassified(100);unclassified(100);unclassified(100);unclassified(100);unclassified(100);unclassified(100);unclassified(100);unclassified(100);unclassified(100);unclassified(100);unclassified(100);unclassified(100);unclassified(100);unclassified(100);unclassified(100);unclassified(100);unclassified(100);unclassified(100);unclassified(100);unclassified(100);unclassified(100);unclassified(100);unclassified(100);unclassified(100);unclassified(100);unclassified(100);unclassified(100);unclassified(100);unclassified(100);unclassified(100);unclassified(100);unclassified(100);unclassified(100);unclassified(100);unclassified(100);unclassified(100);unclassified(100);unclassified(100);unclassified(100);unclassified(100);unclassified(100);unclassified(100);unclassified(100);unclassified(100);unclassified(100);unclassified(100);unclassified(100);unclassified(100);unclassified(100);unclassified(100);unclassified(100);unclassified(100);unclassified(100);unclassified(100);unclassified(100);unclassified(100);unclassified(100);unclassified(100);unclassified(100);unclassified(100);unclassified(100);unclassified(100);unclassified(100);unclassified(100);unclassified(100);unclassified(100);unclassified(100);unclassified(100);unclassified(100);unclassified(100);unclassified(100);unclassified(100);unclassified(100);unclassified(100);unclassified(100);unclassified(100);unclassified(100);unclassified(100);unclassified(100);unclassified(100);unclassified(100);unclassified(100);unclassified(100);unclassified(100);unclassified(100);unclassified(100);unclassified(100);unclassified(100);unclassified(100);unclassified(100);unclassified(100);unclassified(100);unclassified(100);unclassified(100);unclassified(100);unclassified(100);unclassified(100);unclassified(100);unclassified(100);unclassified(100);unclassified(100);unclassified(100);unclassified(100);unclassified(100);unclassified(100);unclassified(100);unclassified(100);unclassified(100);unclassified(100);unclassified(100);unclassified(100);unclassified(100);unclassified(100);unclassified(100);unclassified(100);unclassified(100);unclassified(100);unclassified(100);unclassified(100);unclassified(100);unclassified(100);unclassified(100);unclassified(100);unclassified(100);unclassified(100);unclassified(100);unclassified(100);unclassified(100);unclassified(100);unclassified(100);unclassified(100);unclassified(100);unclassified(100);unclassified(100);unclassified(100);unclassified(100);unclassified(100);unclassified(100);unclassified(100);unclassified(100);unclassified(100);unclassified(100);unclassified(100);unclassified(100);unclassified(100);unclassified(100);unclassified(100);unclassified(100);unclassified(100);unclassified(100);unclassified(100);unclassified(100);unclassified(100);unclassified(100);unclassified(100);unclassified(100);unclassified(100);unclassified(100);unclassified(100);unclassified(100);unclassified(100);unclassified(100);unclassified(100);unclassified(100);unclassified(100);unclassified(100);unclassified(100);unclassified(100);unclassified(100);unclassified(100);unclassified(100);unclassified(100);unclassified(100);unclassified(100);unclassified(100);unclassified(100);unclassified(100);unclassified(100);unclassified(100);unclassified(100);unclassified(100);unclassified(100);unclassified(100);unclassified(100);unclassified(100);unclassified(100);unclassified(100);unclassified(100);unclassified(100);unclassified(100);unclassified(100);unclassified(100);unclassified(100);unclassified(100);unclassified(100);unclassified(100);unclassified(100);unclassified(100);unclassified(100);unclassified(100);unclassified(100);unclassified(100);unclassified(100);unclassified(100);unclassified(100);unclassified(100);unclassified(100);unclassified(100);unclassified(100);unclassified(100);unclassified(100);unclassified(100);unclassified(100);unclassified(100);unclassified(100);unclassified(100);unclassified(100);unclassified(100);unclassified(100);unclassified(100);unclassified(100);unclassified(100);unclassified(100);unclassified(100);unclassified(100);unclassified(100);unclassified(100);unclassified(100);unclassified(100);unclassified(100);unclassified(100);unclassified(100);unclassified(100);unclassified(100);unclassified(100);unclassified(100);unclassified(100);unclassified(100);unclassified(100);unclassified(100);unclassified(100);unclassified(100);unclassified(100);unclassified(100);unclassified(100);unclassified(100);unclassified(100);unclassified(100);unclassified(100);unclassified(100);unclassified(100);unclassified(100);unclassified(100);unclassified(100);unclassified(100);unclassified(100);unclassified(100);unclassified(100);unclassified(100);unclassified(100);unclassified(100);unclassified(100);unclassified(100);unclassified(100);unclassified(100);un |  |  |  |  |

| OTU    | Number of reads |      |     |     | Greengenes taxonomic classification                                                                                                                                                                                                                                                                                                                  |  |  |  |  |
|--------|-----------------|------|-----|-----|------------------------------------------------------------------------------------------------------------------------------------------------------------------------------------------------------------------------------------------------------------------------------------------------------------------------------------------------------|--|--|--|--|
|        | Wol-            | Wol+ | DAM | WAL |                                                                                                                                                                                                                                                                                                                                                      |  |  |  |  |
| Otu199 | 0               | 0    | 0   | 0   | 1 Bacteria(100);Proteobacteria(100);Gammaproteobacteria(100);Betaproteobacteria(100);Comamonadaceae(100);Variovorax_paradoxus(100);unclassified(100);unclassified(100);unclassified(100);unclassified(100);                                                                                                                                          |  |  |  |  |
| Otu200 | 1               | 0    | 0   | 0   | 0 Bacteria(100);Firmicutes(100);Bacilli(100);Lactobacillales(100);Carnobacteriaceae(100);unclassified(100);unclassified(100);unclassified(100);unclassified(100);unclassified(100);unclassified(100);                                                                                                                                                |  |  |  |  |
| Otu201 | 0               | 1    | 7   | 0   | 0 Bacteria(100);Firmicutes(100);Peptococcaceae(100);unclassified(100);unclassified(100);unclassified(100);unclassified(100);unclassified(100);unclassified(100);unclassified(100);unclassified(100);                                                                                                                                                 |  |  |  |  |
| Otu202 | 0               | 0    | 0   | 4   | 1 Bacteria(100);Bacteroidetes(100);vadinBC27(100);unclassified(100);unclassified(100);unclassified(100);unclassified(100);unclassified(100);unclassified(100);unclassified(100);unclassified(100);                                                                                                                                                   |  |  |  |  |
| Otu203 | 0               | 0    | 0   | 0   | 1 Bacteria(100);Planctomycetes(100);Planctomycetacia(100);Pirellaceae(100);unclassified(100);unclassified(100);unclassified(100);unclassified(100);unclassified(100);unclassified(100);unclassified(100);unclassified(100);                                                                                                                          |  |  |  |  |
| Otu204 | 0               | 0    | 4   | 1   | 1 Bacteria(100);Verrucomicrobia(100);Verruco-5(100);RFP12(100);Unclassified(100);unclassified(100);unclassified(100);unclassified(100);unclassified(100);unclassified(100);unclassified(100);unclassified(100);                                                                                                                                      |  |  |  |  |
| Otu205 | 1               | 0    | 0   | 0   | 0 Bacteria(100);Proteobacteria(100);Alphaproteobacteria(100);JP57(100);unclassified(100);unclassified(100);unclassified(100);unclassified(100);unclassified(100);unclassified(100);unclassified(100);unclassified(100);                                                                                                                              |  |  |  |  |
| Otu206 | 0               | 0    | 0   | 0   | 1 Bacteria(100);Proteobacteria(100);Alphaproteobacteria(100);Bradyrhizobiales(100);Methylocystis_echinoides(100);unclassified(100);unclassified(100);unclassified(100);unclassified(100);unclassified(100);unclassified(100);                                                                                                                        |  |  |  |  |
| Otu207 | 0               | 0    | 0   | 1   | 1 Bacteria(100);Alphaproteobacteria(100);Andersenella(100);unclassified(100);unclassified(100);unclassified(100);unclassified(100);unclassified(100);unclassified(100);unclassified(100);unclassified(100);                                                                                                                                          |  |  |  |  |
| Otu208 | 0               | 0    | 0   | 0   | 1 Bacteria(100);Proteobacteria(100);Alphaproteobacteria(100);Bradyrhizobiales(100);UNNAMEABLE_1185325876(100);unclassified(100);unclassified(100);unclassified(100);unclassified(100);unclassified(100);unclassified(100);                                                                                                                           |  |  |  |  |
| Otu209 | 0               | 0    | 0   | 1   | 1 Bacteria(100);Proteobacteria(100);Gammaproteobacteria(100);Aeromonadaceae(100);Unclassified(100);unclassified(100);unclassified(100);unclassified(100);unclassified(100);unclassified(100);unclassified(100);unclassified(100);                                                                                                                    |  |  |  |  |
| Otu210 | 0               | 0    | 0   | 2   | 0 Bacteria(100);Proteobacteria(100);Desulfurellales(100);Unclassified(100);unclassified(100);unclassified(100);unclassified(100);unclassified(100);unclassified(100);unclassified(100);unclassified(100);unclassified(100);                                                                                                                          |  |  |  |  |
| Otu211 | 0               | 0    | 0   | 7   | 0 Bacteria(100);Proteobacteria(100);Gammaproteobacteria(100);Enterobacteriales_Enterobacteriaceae(100);Morganella(100);unclassified(100);unclassified(100);unclassified(100);unclassified(100);unclassified(100);unclassified(100);unclassified(100);unclassified(100);                                                                              |  |  |  |  |
| Otu212 | 0               | 0    | 0   | 7   | 0 Bacteria(100);Firmicutes(100);Clostridia(100);LQ86(100);unclassified(100);unclassified(100);unclassified(100);unclassified(100);unclassified(100);unclassified(100);unclassified(100);unclassified(100);unclassified(100);                                                                                                                         |  |  |  |  |
| Otu213 | 0               | 1    | 1   | 1   | 0 Bacteria(100);Firmicutes(100);Desulfotomaculum(100);Desulfotomaculum_thermocisternum(100);Desulfotomaculum_thermoacetoxidans(100);unclassified(100);unclassified(100);unclassified(100);unclassified(100);unclassified(100);unclassified(100);unclassified(100);unclassified(100);                                                                 |  |  |  |  |
| Otu214 | 0               | 0    | 1   | 0   | 0 Bacteria(100);Proteobacteria(100);Alphaproteobacteria(100);Phyllobacteriaceae(100);Phyllobacterium(100);unclassified(100);unclassified(100);unclassified(100);unclassified(100);unclassified(100);unclassified(100);unclassified(100);unclassified(100);                                                                                           |  |  |  |  |
| Otu215 | 0               | 0    | 3   | 1   | 1 Bacteria(100);Spirochaetes(100);unclassified(100);unclassified(100);unclassified(100);unclassified(100);unclassified(100);unclassified(100);unclassified(100);unclassified(100);unclassified(100);unclassified(100);unclassified(100);unclassified(100);                                                                                           |  |  |  |  |
| Otu216 | 1               | 1    | 1   | 2   | 1 Bacteria(100);Firmicutes(100);Molluscites(100);Mycoplasmatales(100);Mycoplasma_haemomuris(100);BCF7-05(100);unclassified(100);unclassified(100);unclassified(100);unclassified(100);unclassified(100);unclassified(100);unclassified(100);unclassified(100);                                                                                       |  |  |  |  |
| Otu217 | 0               | 1    | 1   | 0   | 0 Bacteria(100);Firmicutes(100);Anaerobranchaceae(100);Dethiobacter(100);unclassified(100);unclassified(100);unclassified(100);unclassified(100);unclassified(100);unclassified(100);unclassified(100);unclassified(100);unclassified(100);                                                                                                          |  |  |  |  |
| Otu218 | 0               | 0    | 1   | 0   | 0 Bacteria(100);Thermil(100);Thermales(100);Meiothermaceae(100);Meiothermus(100);unclassified(100);unclassified(100);unclassified(100);unclassified(100);unclassified(100);unclassified(100);unclassified(100);unclassified(100);                                                                                                                    |  |  |  |  |
| Otu219 | 0               | 0    | 0   | 2   | 2 Bacteria(100);ABY1_OD1(100);FW129(100);KNA6-NB29(100);unclassified(100);unclassified(100);unclassified(100);unclassified(100);unclassified(100);unclassified(100);unclassified(100);unclassified(100);unclassified(100);                                                                                                                           |  |  |  |  |
| Otu220 | 0               | 0    | 0   | 6   | 6 Bacteria(100);Bacteroidetes(100);Flexibacteriales(100);Dyadobacter(100);unclassified(100);unclassified(100);unclassified(100);unclassified(100);unclassified(100);unclassified(100);unclassified(100);unclassified(100);unclassified(100);                                                                                                         |  |  |  |  |
| Otu221 | 0               | 0    | 2   | 1   | 1 Bacteria(100);Firmicutes(100);Molluscites(100);Clostridium_aff_innocuum_CM970(100);Erysipelothrix(100);p-75-a5(100);unclassified(100);unclassified(100);unclassified(100);unclassified(100);unclassified(100);unclassified(100);unclassified(100);unclassified(100);unclassified(100);                                                             |  |  |  |  |
| Otu222 | 0               | 1    | 1   | 0   | 0 Bacteria(100);Planctomycetes(100);Planctomycetacia(100);Isosphaerales(100);Isosphaeraceae(100);Nostocoida_limicola_III(100);aaa36b05(100);unclassified(100);unclassified(100);unclassified(100);unclassified(100);unclassified(100);unclassified(100);unclassified(100);unclassified(100);unclassified(100);                                       |  |  |  |  |
| Otu223 | 0               | 0    | 0   | 0   | 1 Bacteria(100);Proteobacteria(100);Alphaproteobacteria(100);H4(100);Unclassified(100);unclassified(100);unclassified(100);unclassified(100);unclassified(100);unclassified(100);unclassified(100);unclassified(100);unclassified(100);unclassified(100);                                                                                            |  |  |  |  |
| Otu224 | 0               | 0    | 5   | 1   | 1 Bacteria(100);Firmicutes(100);Clostridia(100);Clostridiaceae(100);Clostridium_perfringens(100);unclassified(100);unclassified(100);unclassified(100);unclassified(100);unclassified(100);unclassified(100);unclassified(100);unclassified(100);unclassified(100);unclassified(100);                                                                |  |  |  |  |
| Otu225 | 0               | 0    | 0   | 1   | 1 Bacteria(100);Firmicutes(100);Bacilli(100);Lactobacillales(100);Lactobacillaceae(100);Lactobacillus(100);Lactobacillus_delbrueckii(100);p-2370-55G5(100);unclassified(100);unclassified(100);unclassified(100);unclassified(100);unclassified(100);unclassified(100);unclassified(100);unclassified(100);unclassified(100);unclassified(100);      |  |  |  |  |
| Otu226 | 0               | 0    | 3   | 0   | 0 Bacteria(100);Proteobacteria(100);Alphaproteobacteria(100);Bradyrhizobiales(100);Unclassified(100);unclassified(100);unclassified(100);unclassified(100);unclassified(100);unclassified(100);unclassified(100);unclassified(100);unclassified(100);unclassified(100);unclassified(100);unclassified(100);                                          |  |  |  |  |
| Otu227 | 0               | 0    | 1   | 4   | 1 Bacteria(100);Actinobacteria(100);Actinobacteridae(100);Arthrobacter(100);Unclassified(100);unclassified(100);unclassified(100);unclassified(100);unclassified(100);unclassified(100);unclassified(100);unclassified(100);unclassified(100);unclassified(100);unclassified(100);unclassified(100);                                                 |  |  |  |  |
| Otu228 | 0               | 0    | 0   | 2   | 2 Bacteria(100);Firmicutes(100);Clostridia(100);Eubacteriaceae(100);Acetobacterium(100);Acetobacterium_woodii(100);unclassified(100);unclassified(100);unclassified(100);unclassified(100);unclassified(100);unclassified(100);unclassified(100);unclassified(100);unclassified(100);unclassified(100);                                              |  |  |  |  |
| Otu229 | 0               | 0    | 6   | 1   | 1 Bacteria(100);Proteobacteria(100);Desulfurellales(100);Desulfurellaceae(100);Unclassified(100);unclassified(100);unclassified(100);unclassified(100);unclassified(100);unclassified(100);unclassified(100);unclassified(100);unclassified(100);unclassified(100);unclassified(100);unclassified(100);                                              |  |  |  |  |
| Otu230 | 0               | 0    | 0   | 1   | 1 Bacteria(100);Gemmatimonadetes(100);Gemm-5(100);Unclassified(100);unclassified(100);unclassified(100);unclassified(100);unclassified(100);unclassified(100);unclassified(100);unclassified(100);unclassified(100);unclassified(100);unclassified(100);unclassified(100);                                                                           |  |  |  |  |
| Otu231 | 0               | 0    | 1   | 0   | 0 Bacteria(100);Actinobacteria(100);Actinobacteridae(100);Nocardiaceae(100);unclassified(100);unclassified(100);unclassified(100);unclassified(100);unclassified(100);unclassified(100);unclassified(100);unclassified(100);unclassified(100);unclassified(100);unclassified(100);unclassified(100);                                                 |  |  |  |  |
| Otu232 | 2               | 0    | 0   | 0   | 0 Bacteria(100);Chloroflexi(100);RA13CT(100);unclassified(100);unclassified(100);unclassified(100);unclassified(100);unclassified(100);unclassified(100);unclassified(100);unclassified(100);unclassified(100);unclassified(100);unclassified(100);unclassified(100);                                                                                |  |  |  |  |
| Otu233 | 0               | 0    | 2   | 0   | 0 Bacteria(100);Proteobacteria(100);Alphaproteobacteria(100);Liberibacter(100);unclassified(100);unclassified(100);unclassified(100);unclassified(100);unclassified(100);unclassified(100);unclassified(100);unclassified(100);unclassified(100);unclassified(100);unclassified(100);unclassified(100);                                              |  |  |  |  |
| Otu234 | 0               | 0    | 3   | 0   | 0 Bacteria(100);Proteobacteria(100);Gammaproteobacteria(100);Betaproteobacteria(100);Neisseriales(100);Chromobacterium(100);unclassified(100);unclassified(100);unclassified(100);unclassified(100);unclassified(100);unclassified(100);unclassified(100);unclassified(100);unclassified(100);unclassified(100);unclassified(100);unclassified(100); |  |  |  |  |
| Otu235 | 0               | 0    | 4   | 0   | 0 Bacteria(100);Acidobacteria(100);RB25(100);JG37-AG-81(100);unclassified(100);unclassified(100);unclassified(100);unclassified(100);unclassified(100);unclassified(100);unclassified(100);unclassified(100);unclassified(100);unclassified(100);unclassified(100);unclassified(100);                                                                |  |  |  |  |
| Otu236 | 0               | 0    | 2   | 2   | 2 Bacteria(100);Actinobacteria(100);Actinobacteridae(100);Leucobacter(100);unclassified(100);unclassified(100);unclassified(100);unclassified(100);unclassified(100);unclassified(100);unclassified(100);unclassified(100);unclassified(100);unclassified(100);unclassified(100);unclassified(100);                                                  |  |  |  |  |
| Otu237 | 0               | 0    | 0   | 2   | 2 Bacteria(100);SR1(100);BD2-14(100);unclassified(100);unclassified(100);unclassified(100);unclassified(100);unclassified(100);unclassified(100);unclassified(100);unclassified(100);unclassified(100);unclassified(100);unclassified(100);unclassified(100);                                                                                        |  |  |  |  |
| Otu238 | 0               | 0    | 0   | 2   | 2 Bacteria(100);Verrucomicrobia(100);Verrucomicrobiae(100);Unclassified(100);unclassified(100);unclassified(100);unclassified(100);unclassified(100);unclassified(100);unclassified(100);unclassified(100);unclassified(100);unclassified(100);unclassified(100);unclassified(100);                                                                  |  |  |  |  |
| Otu239 | 1               | 0    | 0   | 3   | 3 Bacteria(100);SR1(100);BH1(100);unclassified(100);unclassified(100);unclassified(100);unclassified(100);unclassified(100);unclassified(100);unclassified(100);unclassified(100);unclassified(100);unclassified(100);unclassified(100);unclassified(100);                                                                                           |  |  |  |  |
| Otu240 | 0               | 0    | 5   | 0   | 0 Bacteria(100);Proteobacteria(100);Gammaproteobacteria(100);Vibrionaceae(100);Grimontia(100);unclassified(100);unclassified(100);unclassified(100);unclassified(100);unclassified(100);unclassified(100);unclassified(100);unclassified(100);unclassified(100);unclassified(100);unclassified(100);unclassified(100);                               |  |  |  |  |
| Otu241 | 0               | 0    | 0   | 1   | 1 Bacteria(100);Firmicutes(100);Bacilli(100);Unclassified(100);unclassified(100);unclassified(100);unclassified(100);unclassified(100);unclassified(100);unclassified(100);unclassified(100);unclassified(100);unclassified(100);unclassified(100);unclassified(100);                                                                                |  |  |  |  |
| Otu242 | 1               | 0    | 0   | 0   | 0 Bacteria(100);Cyanobacteria(100);Chloroplasts(100);vectors(100);Unclassified(100);unclassified(100);unclassified(100);unclassified(100);unclassified(100);unclassified(100);unclassified(100);unclassified(100);unclassified(100);unclassified(100);unclassified(100);unclassified(100);                                                           |  |  |  |  |
| Otu243 | 0               | 0    | 1   | 0   | 0 Bacteria(100);Proteobacteria(100);Alphaproteobacteria(100);Consistiales(100);Pelagibacter(100);SAR11(100);Unclassified(100);unclassified(100);unclassified(100);unclassified(100);unclassified(100);unclassified(100);unclassified(100);unclassified(100);unclassified(100);unclassified(100);unclassified(100);unclassified(100);                 |  |  |  |  |
| Otu244 | 0               | 0    | 2   | 1   | 1 Bacteria(100);Bacteroidetes(100);Flavobacteriales(100);LCP-72(100);unclassified(100);unclassified(100);unclassified(100);unclassified(100);unclassified(100);unclassified(100);unclassified(100);unclassified(100);unclassified(100);unclassified(100);unclassified(100);unclassified(100);                                                        |  |  |  |  |
| Otu245 | 1               | 0    | 0   | 0   | 0 Bacteria(100);Proteobacteria(100);Deltaproteobacteria(100);CD15(100);unclassified(100);unclassified(100);unclassified(100);unclassified(100);unclassified(100);unclassified(100);unclassified(100);unclassified(100);unclassified(100);unclassified(100);unclassified(100);unclassified(100);unclassified(100);                                    |  |  |  |  |
| Otu246 | 0               | 1    | 7   | 2   | 2 Bacteria(100);WS5(100);unclassified(100);unclassified(100);unclassified(100);unclassified(100);unclassified(100);unclassified(100);unclassified(100);unclassified(100);unclassified(100);unclassified(100);unclassified(100);unclassified(100);unclassified(100);                                                                                  |  |  |  |  |
| Otu247 | 0               | 0    | 4   | 0   | 0 Bacteria(100);Unclassified(100);unclassified(100);unclassified(100);unclassified(100);unclassified(100);unclassified(100);unclassified(100);unclassified(100);unclassified(100);unclassified(100);unclassified(100);unclassified(100);unclassified(100);unclassified(100);                                                                         |  |  |  |  |
| Otu248 | 0               | 0    | 0   | 1   | 1 Bacteria(100);Proteobacteria(100);Alphaproteobacteria(100);Azospirillales(100);Unclassified(100);unclassified(100);unclassified(100);unclassified(100);unclassified(100);unclassified(100);unclassified(100);unclassified(100);unclassified(100);unclassified(100);unclassified(100);unclassified(100);                                            |  |  |  |  |
| Otu249 | 0               | 0    | 0   | 0   | 1 Bacteria(100);Acidobacteria(100);iii1-8(100);32-20(100);unclassified(100);unclassified(100);unclassified(100);unclassified(100);unclassified(100);unclassified(100);unclassified(100);unclassified(100);unclassified(100);unclassified(100);unclassified(100);unclassified(100);unclassified(100);                                                 |  |  |  |  |
| Otu250 | 1               | 0    | 2   | 0   | 0 Bacteria(100);Spirochaetes(100);Spirochaetiales(100);Borrelliaceae(100);Unclassified(100);unclassified(100);unclassified(100);unclassified(100);unclassified(100);unclassified(100);unclassified(100);unclassified(100);unclassified(100);unclassified(100);unclassified(100);unclassified(100);                                                   |  |  |  |  |
| Otu251 | 1               | 0    | 1   | 0   | 0 Bacteria(100);Proteobacteria(100);Gammaproteobacteria(100);SAR86(100);environmental_sequence(100);CHAB-I-7(100);unclassified(100);unclassified(100);unclassified(100);unclassified(100);unclassified(100);unclassified(100);unclassified(100);unclassified(100);unclassified(100);unclassified(100);unclassified(100);unclassified(100);           |  |  |  |  |
| Otu252 | 0               | 0    | 2   | 0   | 0 Bacteria(100);Bacteroidetes(100);Hymenobacteriales(100);Pontibacteraceae(100);Pontibacter(100);unclassified(100);unclassified(100);unclassified(100);unclassified(100);unclassified(100);unclassified(100);unclassified(100);unclassified(100);unclassified(100);unclassified(100);unclassified(100);unclassified(100);                            |  |  |  |  |
| Otu253 | 0               | 0    | 5   | 1   | 1 Bacteria(100);TM7(100);TM7-1(100);K20-27(100);unclassified(100);unclassified(100);unclassified(100);unclassified(100);unclassified(100);unclassified(100);unclassified(100);unclassified(100);unclassified(100);unclassified(100);unclassified(100);unclassified(100);unclassified(100);                                                           |  |  |  |  |
| Otu254 | 0               | 0    | 1   | 0   | 0 Bacteria(100);Bacteroidetes(100);Bacteroidales(100);Porphyromonadaceae(100);Porphyromonas_canis(100);Unclassified(100);unclassified(100);unclassified(100);unclassified(100);unclassified(100);unclassified(100);unclassified(100);unclassified(100);unclassified(100);unclassified(100);unclassified(100);unclassified(100);                      |  |  |  |  |
| Otu255 | 0               | 0    | 1   | 16  | 16 Bacteria(100);Bacteroidetes(100);Flavobacteriales(100);Flavobacteriaceae(100);Chryseobacterium(100);unclassified(100);unclassified(100);unclassified(100);unclassified(100);unclassified(100);unclassified(100);unclassified(100);unclassified(100);unclassified(100);unclassified(100);unclassified(100);unclassified(100);unclassified(100);    |  |  |  |  |
| Otu256 | 0               | 0    | 0   | 2   | 2 Bacteria(100);Actinobacteria(100);Actinobacteridae(100);Agromyces(100);unclassified(100);unclassified(100);unclassified(100);unclassified(100);unclassified(100);unclassified(100);unclassified(100);unclassified(100);unclassified(100);unclassified(100);unclassified(100);unclassified(100);                                                    |  |  |  |  |
| Otu257 | 0               | 0    | 2   | 8   | 8 Bacteria(100);Bacteroidetes(100);Flavobacteriales(100);Flavobacteriaceae(100);Wautersiella(100);unclassified(100);unclassified(100);unclassified(100);unclassified(100);unclassified(100);unclassified(100);unclassified(100);unclassified(100);unclassified(100);unclassified(100);unclassified(100);unclassified(100);                           |  |  |  |  |
| Otu258 | 0               | 0    | 1   | 0   | 0 Bacteria(100);Actinobacteria(100);Actinobacteridae(100);Propionibacterineae(100);Propionibacterium(100);Unclassified(100);unclassified(100);unclassified(100);unclassified(100);unclassified(100);unclassified(100);unclassified(100);unclassified(100);unclassified(100);unclassified(100);unclassified(100);unclassified(100);                   |  |  |  |  |
| Otu259 | 0               | 0    | 0   | 1   | 1 Bacteria(100);Thermoacetogenium(100);unclassified(100);unclassified(100);unclassified(100);unclassified(100);unclassified(100);unclassified(100);unclassified(100);unclassified(100);unclassified(100);unclassified(100);unclassified(100);unclassified(100);unclassified(100);                                                                    |  |  |  |  |
| Otu260 | 0               | 1    | 1   | 1   | 1 Bacteria(100);OP8(100);Unclassified(100);unclassified(100);unclassified(100);unclassified(100);unclassified(100);unclassified(100);unclassified(100);unclassified(100);unclassified(100);unclassified(100);unclassified(100);unclassified(100);unclassified(100);                                                                                  |  |  |  |  |
| Otu261 | 1               | 2    | 1   | 0   | 0 Bacteria(100);Thermodesulfobacteria(100);unclassified(100);unclassified(100);unclassified(100);unclassified(100);unclassified(100);unclassified(100);unclassified(100);unclassified(100);unclassified(100);unclassified(100);unclassified(100);unclassified(100);unclassified(100);                                                                |  |  |  |  |
| Otu262 | 0               | 0    | 1   | 0   | 0 Bacteria(100);WS6(100);Unclassified(100);unclassified(100);unclassified(100);unclassified(100);unclassified(100);unclassified(100);unclassified(100);unclassified(100);unclassified(100);unclassified(100);unclassified(100);unclassified(100);unclassified(100);                                                                                  |  |  |  |  |
| Otu263 | 0               | 0    | 1   | 1   | 1 Bacteria(100);Bacteroidetes(100);Saprospirales(100);Terrabacter(100);unclassified(100);unclassified(100);unclassified(100);unclassified(100);unclassified(100);unclassified(100);unclassified(100);unclassified(100);unclassified(100);unclassified(100);unclassified(100);unclassified(100);                                                      |  |  |  |  |
| Otu264 | 1               | 0    | 0   | 0   | 0 Bacteria(100);Bacteroidetes(100);Pocheonbacter(100);unclassified(100);unclassified(100);unclassified(100);unclassified(100);unclassified(100);unclassified(100);unclassified(100);unclassified(100);unclassified(100);unclassified(100);unclassified(100);unclassified(100);unclassified(100);                                                     |  |  |  |  |
